# Supplementary material for: Reciprocity of CO⋯π interactions with the dominant anion–π on fullerene (C60)– amine-based organocatalysts: a mechanistic elucidation for additionvs.decarboxylation reaction
Source: Royal Society of Chemistry journal article supplement (doi:10.1039/d2cp06017e), 2023-01-01
Supplement: d2cp06017e1.pdf [file d2cp06017e1.pdf]

## Supporting Information

# Reciprocity of C=O... $\pi$ Interactions with the Dominant Anion- $\pi$ on Fullerene (C<sub>60</sub>) -Amine- Based Organocatalysts: A Mechanistic Elucidation for Addition vs. Decarboxylation Reaction

Murugesan Panneerselvam<sup>a</sup>, Akash Hiregange<sup>a</sup> and Archita Patnaik<sup>\*a</sup>

<sup>a</sup>Department of Chemistry, Indian Institute of Technology Madras, Chennai - 600 036

Tamil Nadu, India.

E-mail: [archita59@yahoo.com](mailto:archita59@yahoo.com)

**Table. S1** Relative free energies of all the possible intermediates (in kcal/mol) at decarboxylation pathway.

| Catalysts | Functionals/Basis sets                   | <sup>D</sup> F <sub>R</sub> | <sup>D</sup> F <sub>INT1</sub> | <sup>D</sup> F <sub>INT2</sub> | <sup>D</sup> F <sub>p</sub> |
|-----------|------------------------------------------|-----------------------------|--------------------------------|--------------------------------|-----------------------------|
| F1        | B3LYP/6-31G(d)//B3LYP/6-311+G(d,p)       | 0                           | 3.98                           | 10.10                          | -11.99                      |
|           | B3LYP-D3/6-31G(d)//B3LYP-D3/6-311+G(d,p) | 0                           | 3.79                           | 13.49                          | -7.83                       |
| F2        | B3LYP/6-31G(d)//B3LYP/6-311+G(d,p)       | 0                           | -5.74                          | 8.23                           | -15.41                      |
|           | B3LYP-D3/6-31G(d)//B3LYP-D3/6-311+G(d,p) | 0                           | -4.34                          | 9.90                           | -10.23                      |

**Table. S2** Relative free energies of all the possible intermediates (in kcal/mol) at addition pathway.

| Catalysts | Functionals/Basis sets                   | <sup>A</sup> F <sub>R</sub> | <sup>A</sup> F <sub>INT1</sub> | <sup>A</sup> F <sub>INT2</sub> | <sup>A</sup> F <sub>INT3</sub> | <sup>A</sup> F <sub>INT4</sub> | <sup>A</sup> F <sub>p</sub> |
|-----------|------------------------------------------|-----------------------------|--------------------------------|--------------------------------|--------------------------------|--------------------------------|-----------------------------|
| F1        | B3LYP/6-31G(d)//B3LYP/6-311+G(d,p)       | 0                           | -1.46                          | 15.56                          | 4.94                           | 11.33                          | -11.82                      |
|           | B3LYP-D3/6-31G(d)//B3LYP-D3/6-311+G(d,p) | 0                           | -2.84                          | 1.01                           | -12.36                         | 0.47                           | -18.04                      |
| F2        | B3LYP/6-31G(d)//B3LYP/6-311+G(d,p)       | 0                           | -6.31                          | 12.72                          | 7.94                           | 5.43                           | -16.28                      |
|           | B3LYP-D3/6-31G(d)//B3LYP-D3/6-311+G(d,p) | 0                           | -5.45                          | 1.65                           | -11.59                         | -1.00                          | -20.00                      |

**Table S3.** Relative free energy differences between ‘without’ and ‘with’ diffuse basis sets involving anionic intermediates (in kcal/mol) for both the pathways.

| Anionic Species                 | Basis Sets |           | Diffuse Basis Set (along with Dispersion-D3) |              |
|---------------------------------|------------|-----------|----------------------------------------------|--------------|
|                                 | 6-31G(d)   | 6-31+G(d) | 6-31G(d)-D3                                  | 6-31+G(d)-D3 |
| <sup>D</sup> F1 <sub>INT1</sub> | 0          | -4.91     | 0                                            | -2.82        |
| <sup>D</sup> F2 <sub>INT1</sub> | 0          | -2.73     | 0                                            | -3.15        |
| <sup>A</sup> F1 <sub>INT1</sub> | 0          | -3.66     | 0                                            | -2.82        |
| <sup>A</sup> F1 <sub>INT1</sub> | 0          | -4.02     | 0                                            | -2.59        |

**All possible conformers (Con) of the reactant species**

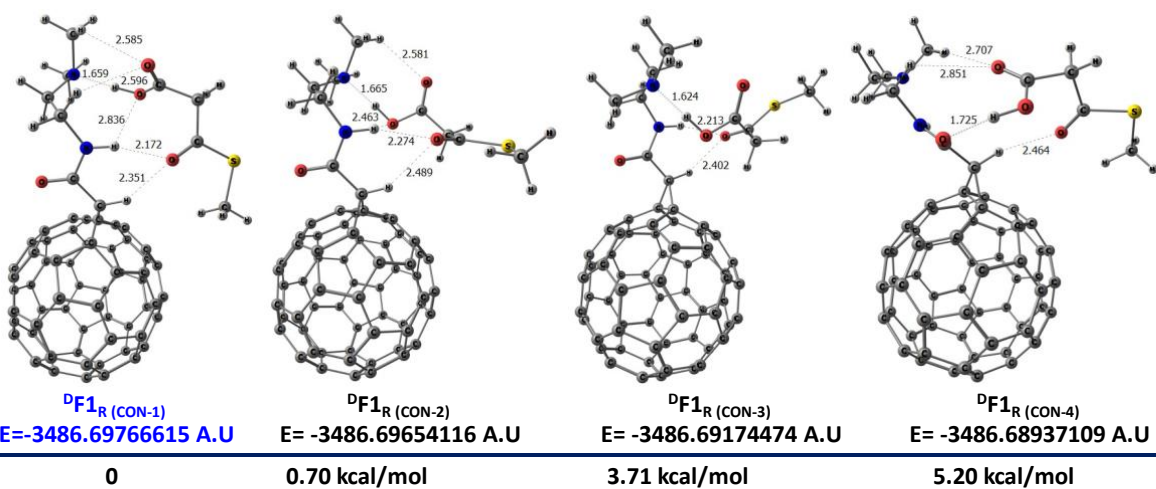

**All possible conformers (Con) of the anionic intermediate (Int1) species**

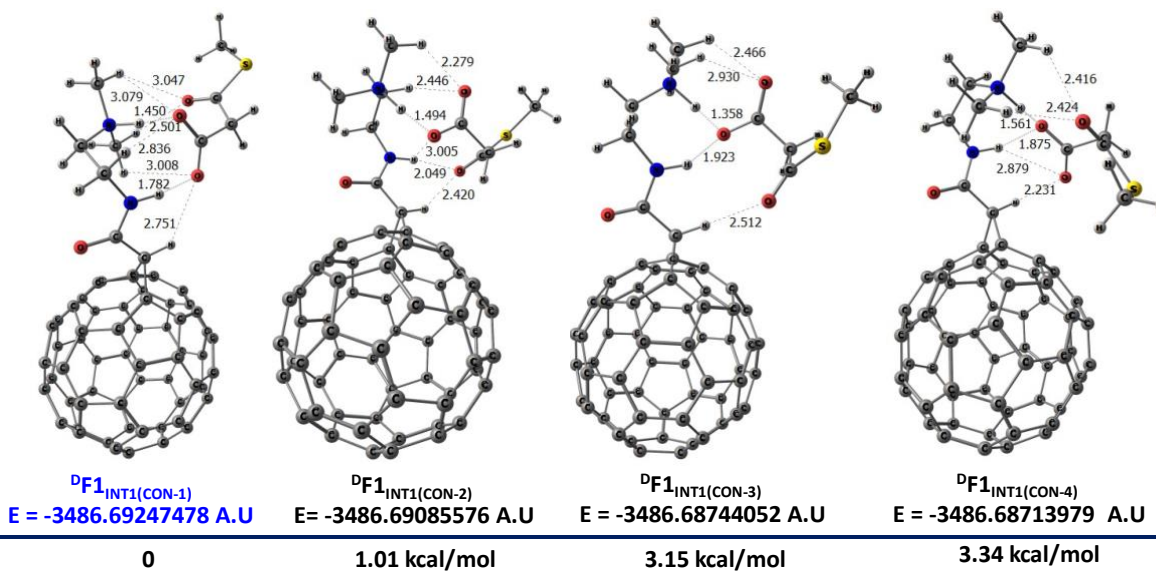

**Figure S1.** All possible conformers of the reactant and intermediates (anionic) species along with their energies in Hartree and relative energies in kcal/mol.

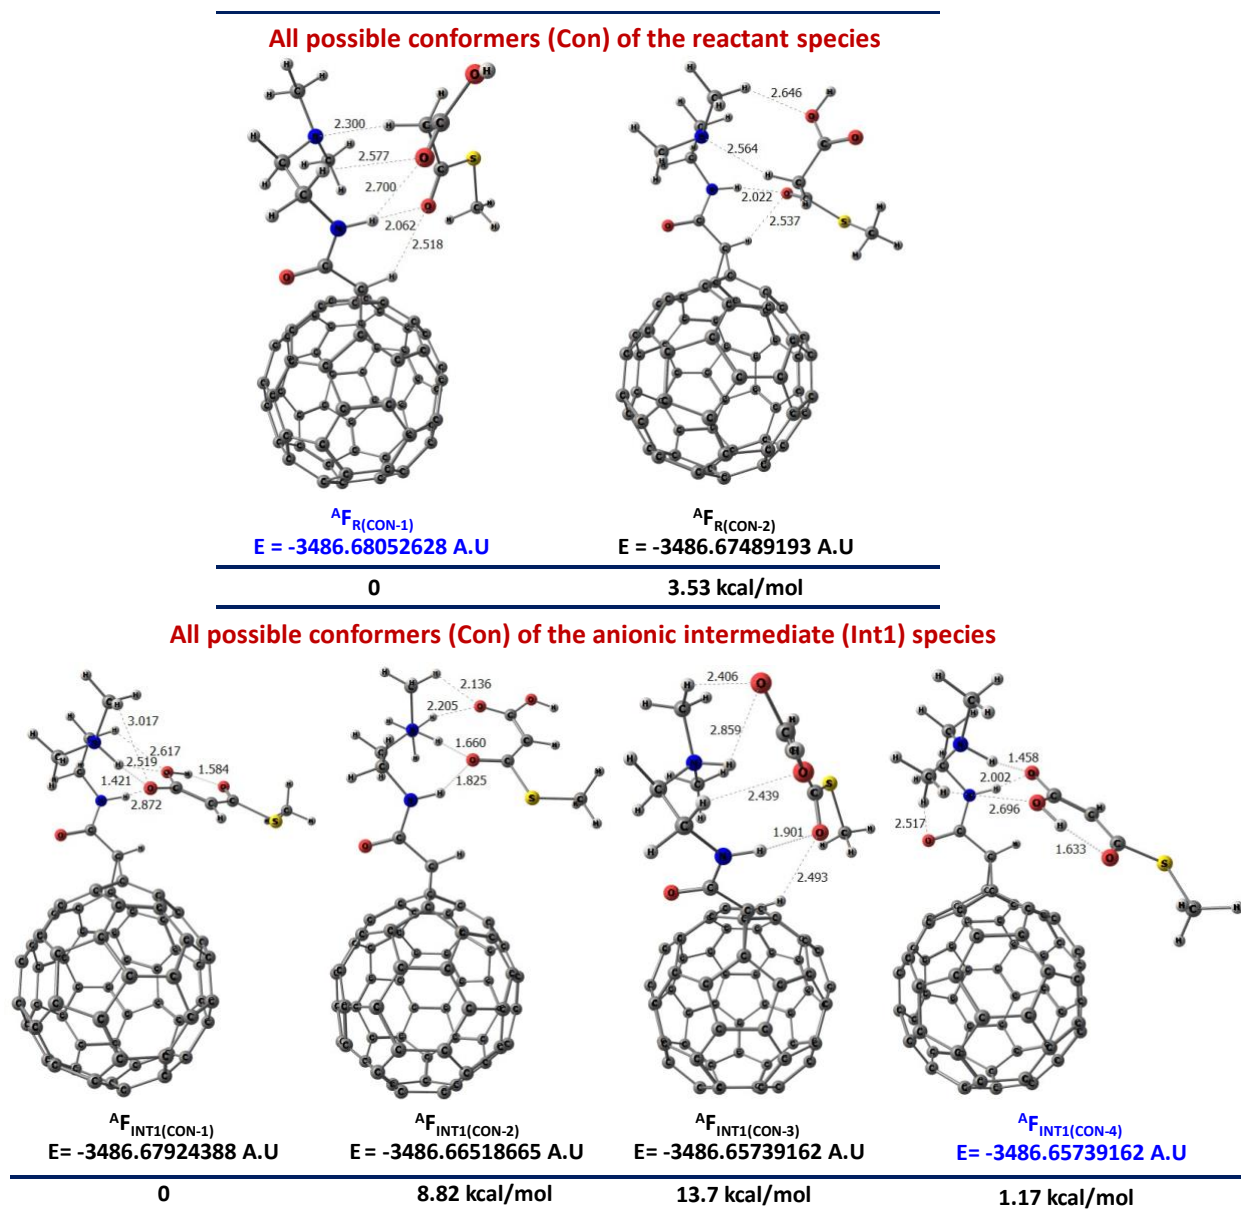

**Figure S2.** All possible conformers of the reactant and intermediates (anionic) species along with their energies in Hartree and relative energies in kcal/mol.

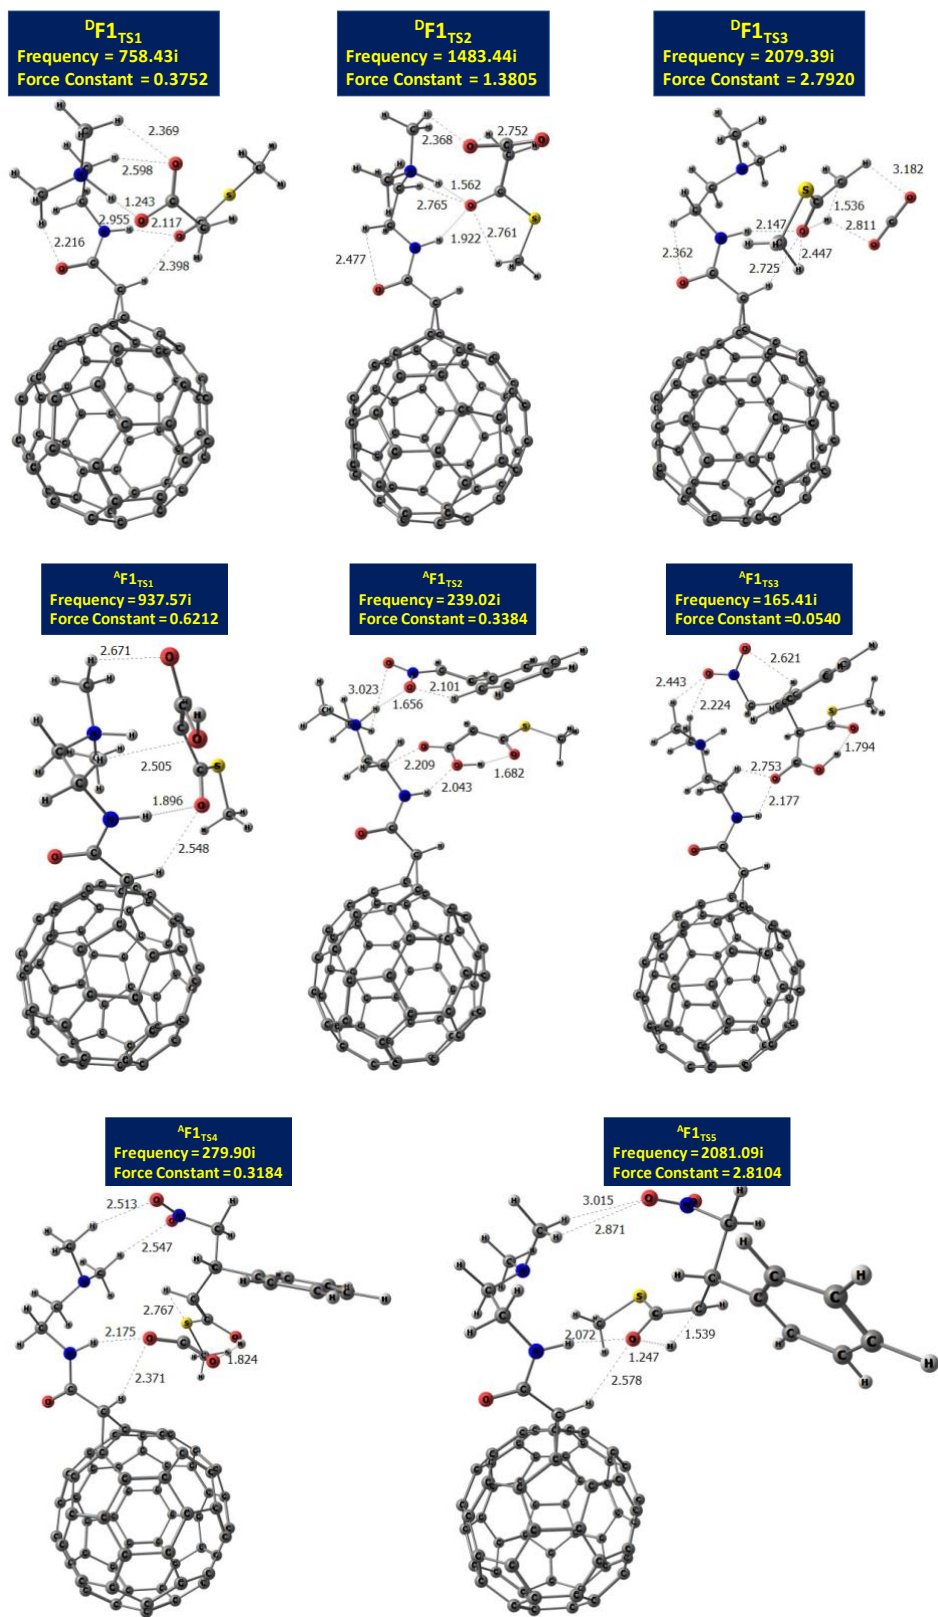

**Figure S3.** All possible inter and intramolecular hydrogen bond interactions of the eight transition states in decarboxylation and addition pathways for catalyst F1.

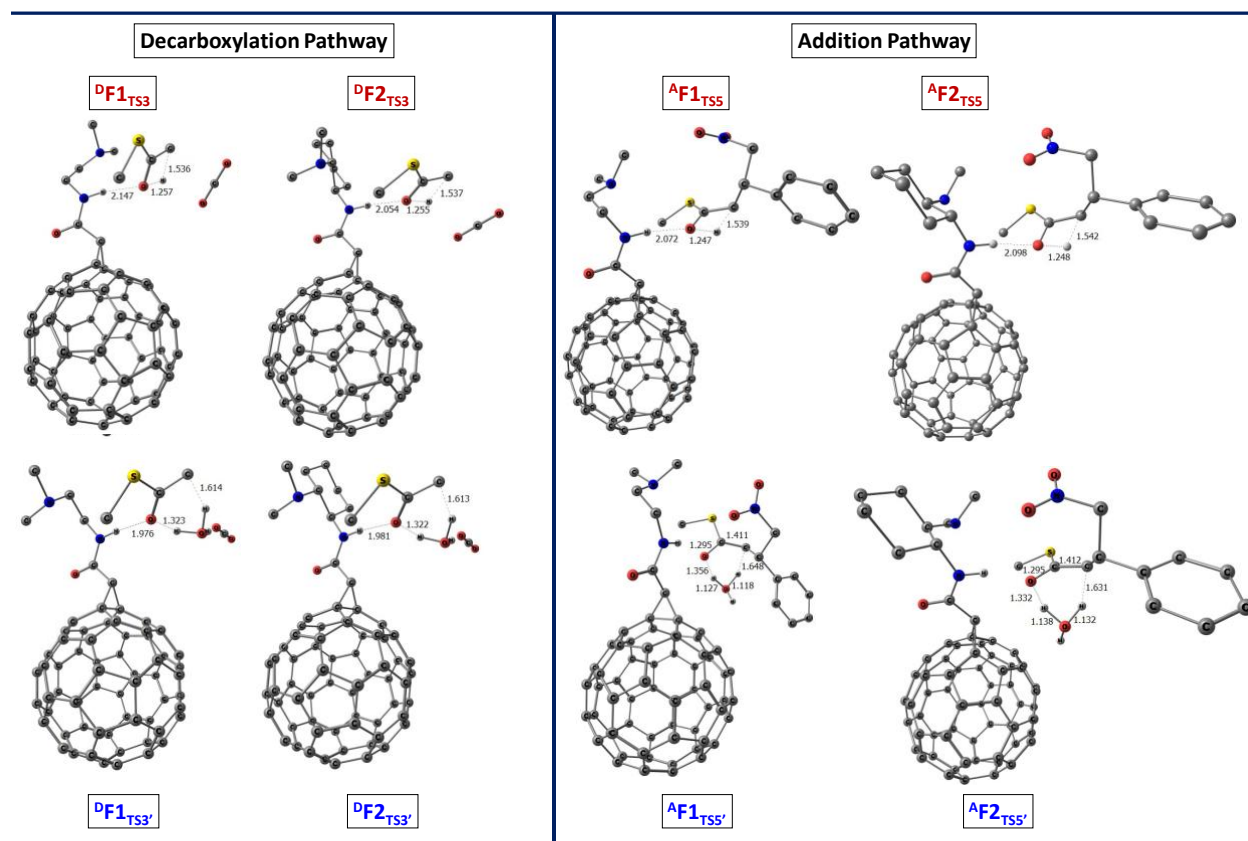

**Figure S4.** The transition state geometries along with the distances and their H-bonding interactions of the keto–enol tautomerization processes.

### 1.1 The Nature of Transition States via Bond Order Analysis

The bond order analysis is based on changes in the degree of bonding and computing the percentages of bond forming (BF<sub>*i*</sub>) and bond cleaving (BC<sub>*j*</sub>) at a particular transition state of the reaction path (addition or decarboxylation). More specifically, the bond order analysis exposes the transition state's bond making and breaking processes in the chemical reactions. This could be mainly identified by calculating the average percentage of bond formation cleavage (BFC<sub>ave</sub>) in the TS geometries and their percentages are summarized in Table S4. Importantly, the computed BFC<sub>ave</sub> value indicates an early - “reactant-like” transition state if it ranges between 40-43%. On the other hand, BFC<sub>ave</sub> values > 60% denote the TS as a late - “product-like” transition state. In the case of the decarboxylation pathway, the rupturing of O–H bond length in <sup>D</sup>F1<sub>TS1</sub> was calculated to be around 1.243 Å, which is quite larger compared to the O–H bond length in <sup>D</sup>F1<sub>R</sub> (1.032 Å). At the same time, the N–H bond length was estimated to be shorter (1.113 Å) than the same in

${}^D F_{1TS1}$  transition state (1.272 Å for N–H). Also, the percentage of bond forming ( $B F_i$ ) (N–H) and bond cleaving ( $B C_j$ ) (O–H) indices were calculated to be 69.76% and 63.68% respectively. Therefore, the transition state  ${}^D F_{1TS1}$  is more of “product-like” which is endorsed by a  $B F C_{Ave}$  value (Table S4). The percentages of  $B F_i$ ,  $B C_j$  and  $B F C_{Ave}$  of the pertinent bonds in the transition state  ${}^D F_{TS2}$  are estimated and listed in Table S4. Again, this transition state for decarboxylation step was highly “product-like” and was endogenic (21.78 kcal/mol) with respect to the reactant  ${}^D F_R$ .

**Table S4.** Computed Wiberg Bond Formation ( $B F_i$ ), Bond Cleavage ( $B C_j$ ) Indices and Bond Formation Cleavage Average ( $B F C_{Ave}$ ) (in %) of all chosen transition states (TS) across both addition and decarboxylation pathways for both the catalysts F1 and F2.

| Pathways                            | Transition States | $B F_i$ (%) | $B C_j$ (%)              | $B F C_{Ave}$ (%) |
|-------------------------------------|-------------------|-------------|--------------------------|-------------------|
| <b>Catalyst (C<sub>60</sub>)-F1</b> |                   |             |                          |                   |
| Decarboxylation                     | ${}^D F_{1TS1}$   | 69.76 (N-H) | 63.68 (O-H)              | 66.72             |
|                                     | ${}^D F_{1TS2}$   | 53.25 (O-H) | 78.55 (N-H); 72.61 (C-C) | 68.14             |
|                                     | ${}^D F_{1TS3}$   | 33.53 (C-H) | 59.05 (O-H)              | 46.29             |
| Addition                            | ${}^F F_{1TS1}$   | 62.15 (N-H) | 40.94 (O-H)              | 51.54             |
|                                     | ${}^F F_{1TS2}$   | 41.51 (C-C) | -                        | 41.51             |
|                                     | ${}^F F_{1TS3}$   | 29.88 (C-H) | 95.35 (N-H)              | 62.62             |
|                                     | ${}^F F_{1TS4}$   | 86.30 (O-H) | 12.81 (O-H); 39.79 (C-C) | 46.30             |
|                                     | ${}^F F_{1TS5}$   | 35.74 (C-H) | 50.08 (O-H)              | 42.92             |
| <b>Catalyst(C<sub>60</sub>)-F2</b>  |                   |             |                          |                   |
| Decarboxylation                     | ${}^D F_{2TS1}$   | 58.69 (N-H) | 72.23 (O-H)              | 65.46             |
|                                     | ${}^D F_{2TS2}$   | 11.61 (O-H) | 90.66 (N-H); 23.06 (C-C) | 41.77             |
|                                     | ${}^D F_{2TS3}$   | 39.63 (C-H) | 57.65 (O-H)              | 48.64             |
| Addition                            | ${}^F F_{2TS1}$   | 75.37 (N-H) | 43.65 (O-H)              | 59.51             |
|                                     | ${}^F F_{2TS2}$   | 42.93 (C-C) | -                        | 42.93             |
|                                     | ${}^F F_{2TS3}$   | 39.62 (C-H) | 83.21 (N-H)              | 61.42             |
|                                     | ${}^F F_{2TS4}$   | 78.07 (O-H) | 22.73 (O-H); 47.64 (C-C) | 49.48             |
|                                     | ${}^F F_{2TS5}$   | 35.32 (C-H) | 50.21 (O-H)              | 42.76             |

Furthermore, a highly exoergic pathway was noticed for the final step of enol-to-keto formation/ the product ( ${}^D F_{1P}$ ). The bond forming (C–H; 1.536 Å) and breaking (O–H; 1.256 Å) were matured by 33.53% and 59.05% respectively, while the total  $B F C_{Ave}$  was computed to be

46.29%. This specifies the transition state  ${}^D\text{F1}_{\text{TS3}}$  (enol-to-keto) was “early” in category. From the estimated  $\text{BC}_j$ ,  $\text{BF}_i$  and  $\text{BFC}_{\text{Ave}}$  components in Table S1, the initial step was associated with the breaking of  $\alpha$ -hydrogen (C–H; 1.522 Å) and making of the N–H bond (N–H; 1.237 Å) in the transition state  ${}^A\text{F1}_{\text{TS1}}$  ( $\text{BFC}_{\text{Ave}}$ : 51.54%). This implied the “middle” nature of the transition state, falling neither into ‘product-like’ nor “reactant-like” categories. Besides, the other  $\text{BFC}_{\text{Ave}}$  values matured in the range between ~41 to 46% for  ${}^A\text{F1}_{\text{TS2}}$ ,  ${}^A\text{F1}_{\text{TS4}}$  and  ${}^A\text{F1}_{\text{TS5}}$ . Among the two pathways, the transition state  ${}^A\text{F}_{\text{TS3}}$  for the addition pathway could be described as “product-like” ( $\text{BFC}_{\text{Ave}}$  = 62.62%). Overall, except  ${}^A\text{F1}_{\text{TS3}}$ , all the transition states were “reactant-like” (early TSs), bringing out bond cleavage and bond forming percentages in the addition path. For catalyst F2,  ${}^D\text{F2}_{\text{TS2}}$  witnessed the C–C bond cleavage (23.06 %) to be faster ( $\text{BFC}_{\text{Ave}}$ : 41.77%) than  ${}^D\text{F1}_{\text{TS2}}$  ( $\text{BFC}_{\text{Ave}}$ : 68.14%), as collected in Table S1. In addition, for catalyst F2,  $\text{BFC}_{\text{Ave}}$  were estimated to be matured in the range 42–62% in all the five transition states which undoubtedly ascertains the fact that the key transition states are “early TS” in nature. This detailed analysis distinctly brought out the reaction coordinates and the feasibility of the reaction path, rendering it favourable for addition rather than the decarboxylation pathway.

## 1.2 Non-covalent Interaction (NCI) Analysis:

The NCI-RDG analysis was carried out on the optimized geometries of all intermediates and the corresponding transition states showing the stabilizing attractive (blue), destabilizing repulsive (red), and weak van der Waals (green) interactions. The RDG and their corresponding isosurfaces were calculated to identify the regions of non-covalent interactions and to analyze the strength of interactions between the substrates and the fullerene ( $\text{C}_{60}$ ) catalyst. Figure 7 displays the RDG scatter plots and their corresponding sign of  $(\lambda_2)\rho$  values. In Figure 7, anionic intermediates showed two interactions, the C=O--- $\pi$  surface and the anion- $\pi$  interactions with the corresponding interaction lengths computed to be 2.691 Å and 3.790 Å for  ${}^A\text{F1}_{\text{INT1}}$  and 2.710 Å and 3.761 Å for  ${}^A\text{F2}_{\text{INT1}}$ . At the same time,  ${}^D\text{F1}_{\text{INT1}}$  and  ${}^D\text{F2}_{\text{INT1}}$  showed only the C=O--- $\pi$  surface interaction with a distance of 2.715 Å and 2.641 Å, while the anion- $\pi$  interaction was absent. This finding agrees with the experimental report where López-Andarias and co-workers mentioned the  ${}^A\text{F}_{\text{INT1}}$  intermediates to exhibit anion- $\pi$  surface interactions in the addition pathway, whereas, the  ${}^D\text{F}_{\text{INT1}}$  intermediates do not show the same across the decarboxylation pathway. If this were not the case, then  ${}^A\text{F}_{\text{INT1}}$  intermediates would not be exoergic with respect to  ${}^D\text{F}_{\text{INT1}}$  (Figures 1 and 2),

and, would have contradicted the experimental observations. Figure 7 also shows the RDG isosurface maps of  ${}^D F_{INT1}$  and  ${}^A F_{INT1}$  with selected weak interactions such as the intramolecular hydrogen bond (attractive and shown in blue), destabilizing repulsive and weak van der Waals interactions. In NCI analysis, the non-covalent interactions have  $\lambda_2$  values ranging from large negative magnitudes to zero. On the other side, the positive  $\lambda_2$  values indicate the destabilizing repulsive interactions. In  ${}^A F_{INT1}$ , a strong attractive region exists between the anionic substrate and the fullerene catalyst, attributed to anion- $\pi$  interaction and is depicted as vdW interactions. More importantly, the existence of characteristic C=O--- $\pi$  interaction is seen to be prevalent on the catalyst surfaces.

Comparatively, the non-covalent interaction plots of intermediates  ${}^A F_{1INT1}$  and  ${}^A F_{2INT1}$  describe the presence of strong attractive interactions of intermolecular hydrogen bonding and vdW interactions. This attractive region is missing between anionic substrate and fullerene catalyst in  ${}^D F_{1INT1}$  and  ${}^D F_{2INT1}$  as shown in Figure 7. The above computational analysis thus estimated various non-covalent interactions of the type, N-H---O, O-H---O, C=O--- $\pi$  and C-O--- $\pi$  that stabilized the anionic intermediates. This investigation therefore concretely proves the significant role played by anion- $\pi$  interactions in stabilizing  ${}^A F_{INT1}$  intermediates, but not  ${}^D F_{INT1}$  intermediates, further supported by the earlier experimental observations.<sup>1</sup>

### 1.3 QTAIM Analysis:

Quantum theory of atoms in molecules (QTAIM) analysis was widely used to study the nature of chemical bonds, hydrogen bonds and various weak interactions present in the reactive species. It is well established that QTAIM analysis is predictable to understanding weak interactions in an anionic intermediate in addition reactions. In the present study, bonding and non-bonding interactions were analysed by assessing the topological properties that indicates the strength of the bond critical points (BCP's) and represents the nature of the bond. Various topological properties such as electron density ( $\rho(r)$ ), Laplacian of electron density ( $\nabla^2 \rho(r)$ ), Hessian values ( $\lambda_1, \lambda_2$ ), the potential energy density  $V(r)$  and kinetic energy density  $G(r)$  values have been calculated and listed in Table 1. As estimated, the molecular graph shows various types of interactions involving in both the anionic intermediates. The computed electron density at the BCPs for these interactions is well located within the hydrogen bond limits (0.002-0.035 a.u) and negative  $\nabla^2 \rho(r)$  values show these interactions are closed shell in nature.<sup>2,3</sup> It could be noted that



N-H<sub>3</sub>---O<sub>3</sub> (1.458 Å) has the higher electron density with 0.091 a.u (for <sup>A</sup>F1<sub>INT1</sub>) while others range from 0.002 to 0.02 a.u. A similar situation was detected for the <sup>A</sup>F2<sub>INT1</sub> intermediate (Figure 8) Furthermore, the calculated electron densities at BCPs of anion-π surface interactions were higher (0.0022 for H1---C1 and 0.0023 for S---C2) in <sup>A</sup>F2<sub>INT1</sub> and in <sup>A</sup>F1<sub>INT1</sub>, they were 0.0022 for H1---C1 and 0.0022 for S---C2, respectively. Furthermore, other important topological properties like |V|/G ratio values were calculated for both the <sup>A</sup>F1<sub>INT1</sub> and <sup>A</sup>F2<sub>INT1</sub> intermediates. It is profound to compute the covalency of all the discussed interactions. |V|/G ratio ~1 indicates the shared interactions are of closed shell type. The computed |V|/G ratio of strong intermolecular hydrogen bonding interactions of <sup>A</sup>F1<sub>INT1</sub> and <sup>A</sup>F2<sub>INT1</sub> were 1.514 and 1.422, implying stronger N-H---O interactions, vide Table 1. On other hand, for the anion-π stacking interactions in <sup>A</sup>F1<sub>INT1</sub> and <sup>A</sup>F2<sub>INT1</sub> the |V|/G ratio were estimated to be in the range 0.67 to 0.79. Additionally, the C=O---C<sub>60</sub> surface (intra-molecular) interactions involved in <sup>A</sup>F2<sub>INT1</sub> showed |V|/G ratio closer to ~0.80 when compared to <sup>A</sup>F2<sub>INT1</sub> intermediate (~0.80 a.u), revealing the importance and the strength of these interactions. Moreover, the <sup>A</sup>F1<sub>INT1</sub> shows two C=O---C<sub>60</sub> surface interactions (C=O<sub>4</sub>---C<sub>6</sub> and C=O<sub>4</sub>---C<sub>7</sub>), that are strong with electron densities ~0.008 a.u and |V|/G ratio ~0.8, which are quite comparable with other inter-molecular hydrogen bonding interactions. Overall, this study not only emphasized the importance of the intermolecular hydrogen bonding interactions, but also established two C=O---C<sub>60</sub> surface (C=O---C<sub>5(C60)}</sub> and C=O---C<sub>6(C60)}</sub>) and four anion---C<sub>60</sub> interactions (C-H---C<sub>1(C60)}</sub>, S---C<sub>2(C60)}</sub>, O<sub>1</sub>---C<sub>3(C60)}</sub> and C<sub>1</sub>---C<sub>4(C60)}</sub>) respectively, that helps in the stabilization of the anionic intermediates.

#### 1.4 Synergistic Frontier Molecular Orbital (FMO) Energy Levels:

Anion-π interactions relate to the LUMO level of the catalyst. Studies have shown the origin of intrinsic anion-π interactions associated with intrinsic pi-acidity to be synonymous with low LUMO levels. Accordingly, frontier molecular orbital (FMO) analysis for the ground state geometries of reactants, anionic intermediates and products was undertaken and the results are presented in Figure S5(a) and S5(b). For the selected reactive species across both the pathways, HOMO-LUMO energy gaps ranged between 2.27 to 2.57 eV. More specifically, <sup>A</sup>F1<sub>INT1</sub> and <sup>A</sup>F2<sub>INT1</sub> anionic intermediates possessed the smallest energy gaps of 2.31 eV and 2.27 eV respectively, suggesting them to be consistent with increasing electron sharing through anion-π interactions. Hence, stabilization of anionic intermediates could be facilitated by anion-π

interactions on  $\pi$ - acidic surfaces and via electronic communication within this anion- $\pi$  stack, as reflected in the energy gaps. The small energy gap was caused by favorable electronic communication between the fullerene surfaces and anionic substrates in the stacks. On analyzing the corresponding FMOs, the HOMOs were associated with  $\pi$ -characters and LUMOs with  $\pi^*$  characters in fullerene catalysts.

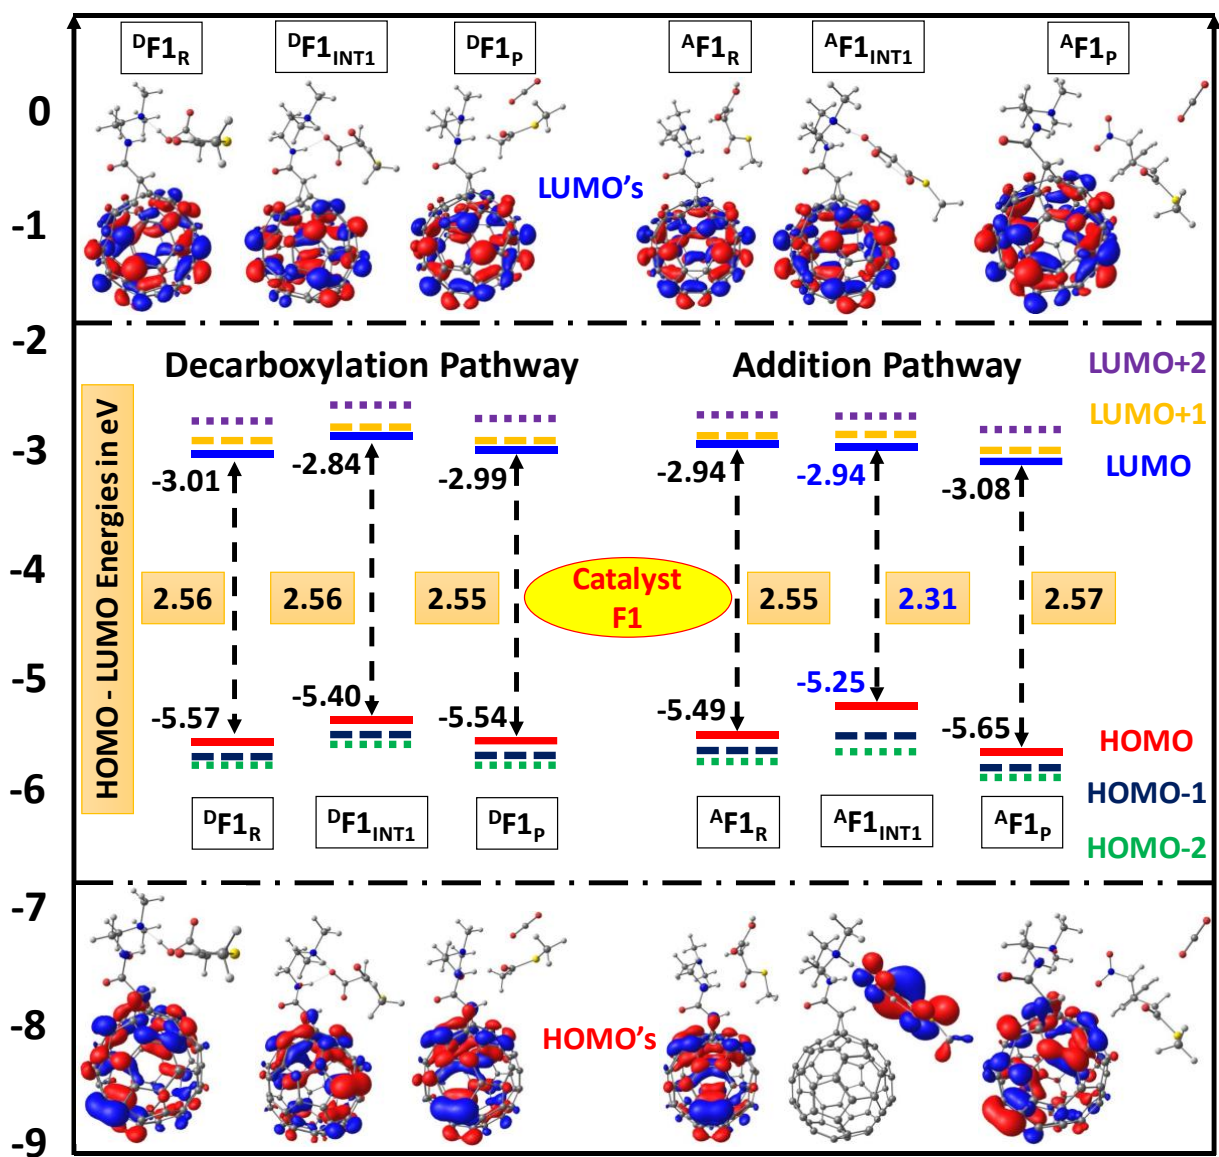

**Figure S5(a).** The energy level diagram of frontier molecular orbitals of fullerene catalyst-F1 in the gas phase obtained at the B3LYP/6-31G(d) level of theory.

Especially, the HOMO's distribution of  ${}^A\text{F1}_{\text{INT1}}$  and  ${}^A\text{F2}_{\text{INT2}}$  intermediates are mainly localized within the anionic substrate species and LUMO's distributions only with fullerene systems. Moreover, the HOMO orbitals of  ${}^A\text{F1}_{\text{INT1}}$  and  ${}^A\text{F2}_{\text{INT1}}$  were computed to be highly stabilized with energies -5.25 eV and -5.17 eV while the other species were relatively less stabilized with energies ranging from -5.65 eV to -5.36 eV.

Analyzing the distribution pattern of HOMOs of reactants, intermediates and products (Figure S5(a) and S5(b)) it is revealed that the molecular orbitals were populated over the entire fullerene molecule with strong  $\pi$  character, while the LUMOs were also delocalized over the entire fullerene molecular skeleton with  $\pi^*$  character, except  ${}^A\text{F1}_{\text{INT1}}$  and  ${}^A\text{F2}_{\text{INT1}}$ . This also confirms the HOMO to LUMO electronic transitions to be of  $\pi \rightarrow \pi^*$  nature. On the other hand, the HOMOs of  ${}^A\text{F1}_{\text{INT1}}$  and  ${}^A\text{F2}_{\text{INT1}}$  were computed to be distributed mainly over the anionic substrates, resembling lone pairs of non-bonding orbitals of C=O and C-O<sup>-</sup> parts and the LUMOs were populated over the entire fullerene molecular geometry with  $\pi^*$  orbital nature, thus originating intramolecular charge transfer (ICT) type of interactions. Therefore, a considerable amount of electron density had been delocalized from anionic substrates to fullerene part indicating the prevalence of strong intramolecular charge transfer (ICT). As discussed in the FMO analysis, the HOMO to LUMO transition for the first set of two molecules ( ${}^A\text{F1}_{\text{INT1}}$  and  ${}^A\text{F2}_{\text{INT1}}$ ) were computed to be purely of ICT nature while all other species exhibited with  $\pi \rightarrow \pi^*$  transitions.

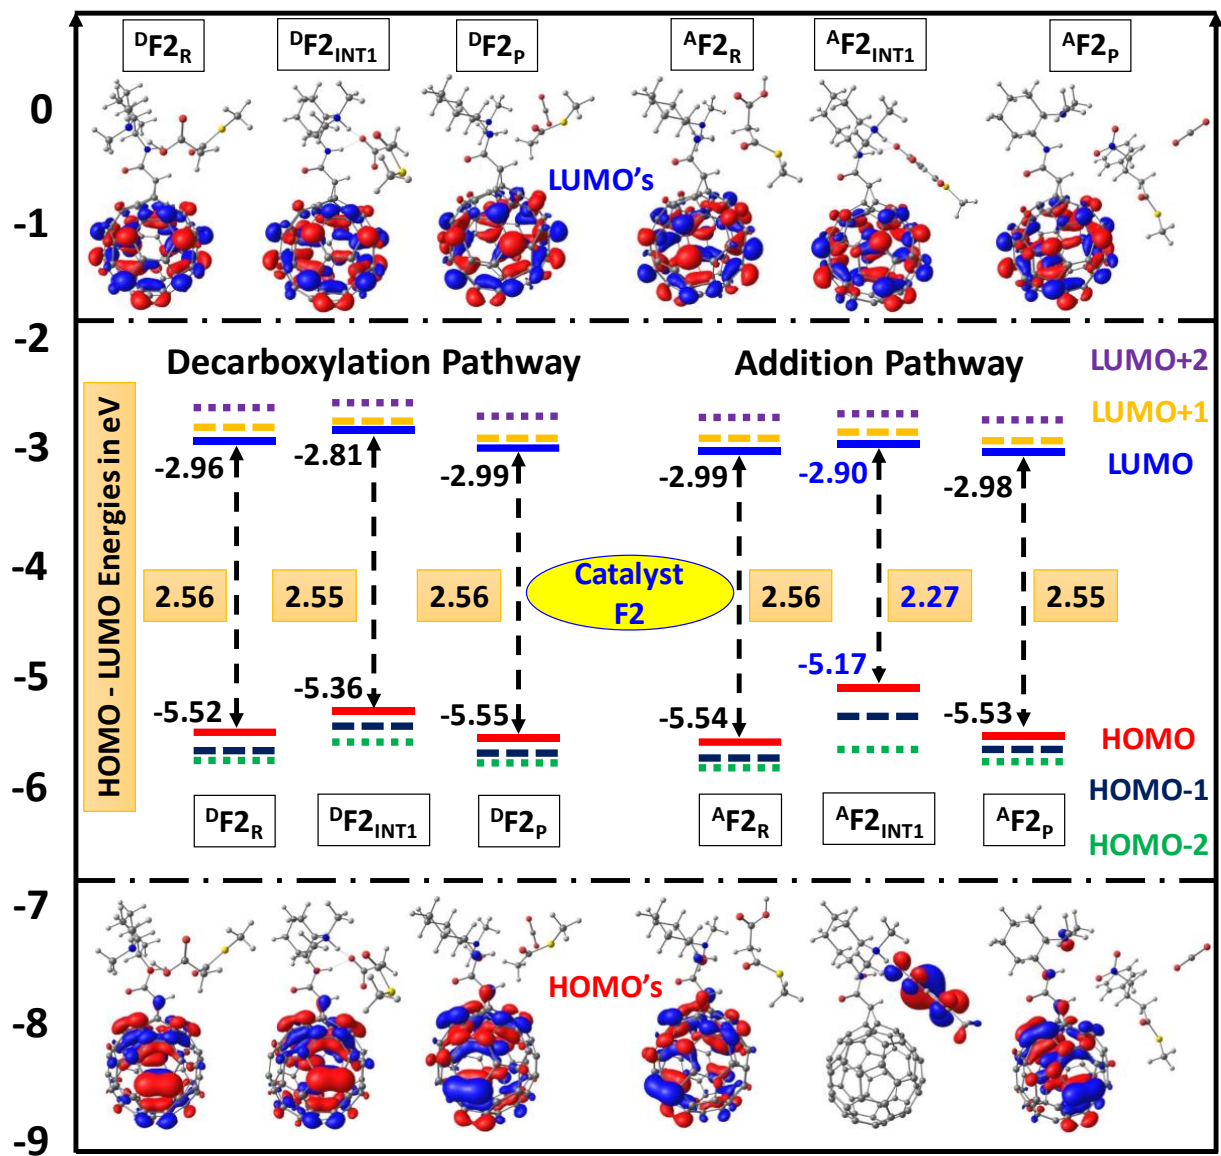

**Figure S5(b).** The energy level diagram of frontier molecular orbitals of fullerene catalyst-F2 in the gas phase obtained at the B3LYP/6-31G(d) level of theory.

## 1.5. Molecular Electrostatic Potential Mapping (MESP)

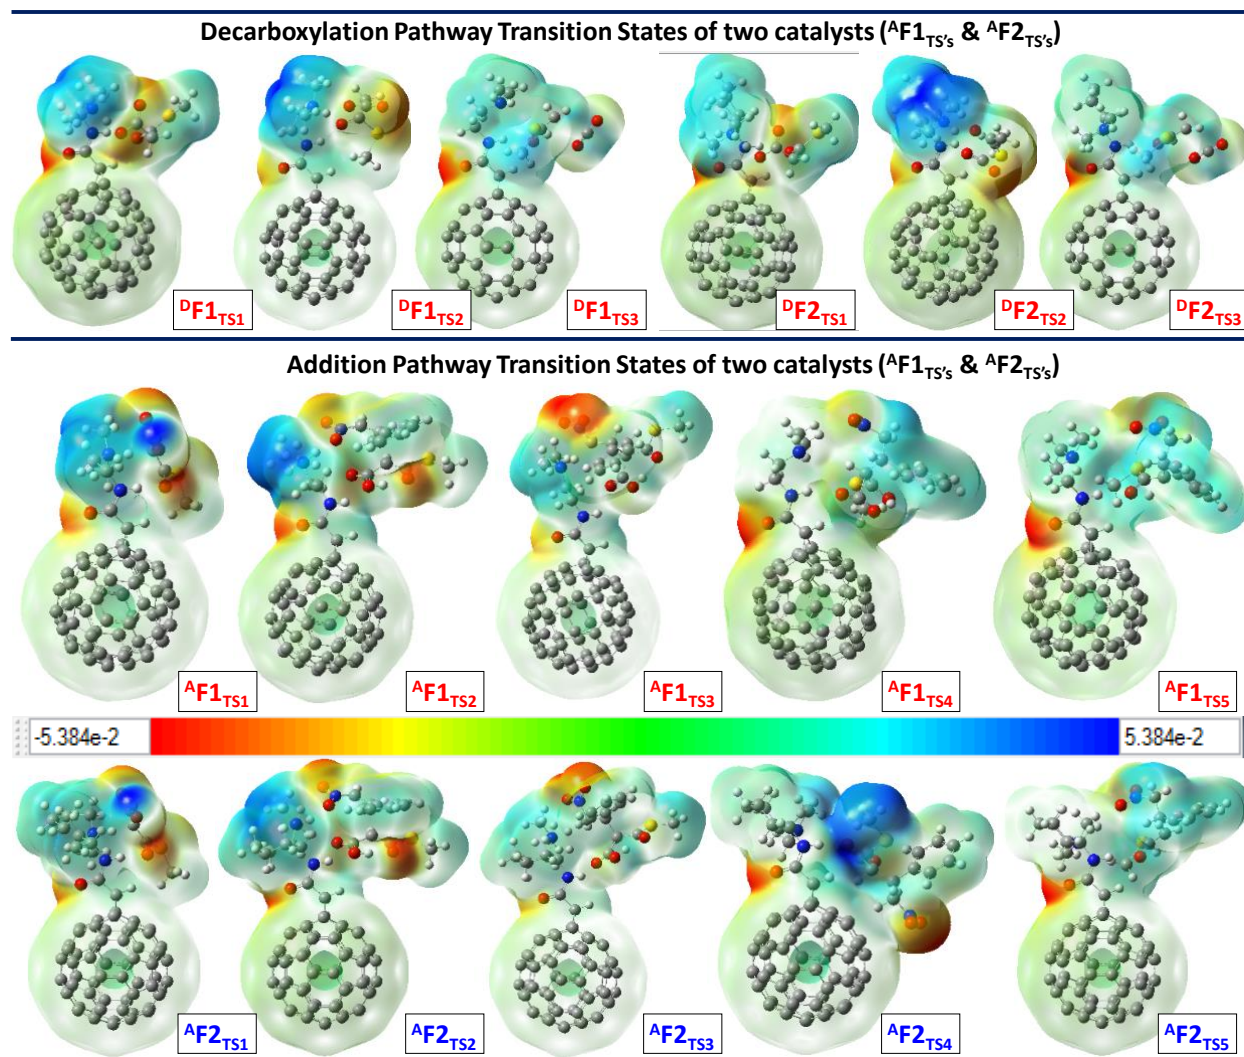

**Figure S6.** All transition states of MESP maps are depicted in decarboxylation and addition pathways.

## 1.6 Natural Bond Orbital (NBO) Analysis

The possible interactions associated with the transition states for both the pathways were estimated following NBO analysis, employed at the B3LYP/6-31G(d) level of theory, using the optimized geometries. Especially, the second-order perturbation interaction energies between the substituted fullerene C<sub>60</sub> catalyst and the substrate orbitals could play an extensive role in recognizing their reactivity. In view of this, the calculated second-order perturbation stabilization energy ( $E^2$ ) for the most prominent interactions in these transition states are collected in Table S5 & S3 and Figure S7(a) & S7(b). In Pathway-I (decarboxylation),  ${}^D F1_{TS1}$  is highly stabilized in the lone pairs of nitrogen (N<sub>71</sub> in fullerene) and oxygen (O<sub>95</sub>) atoms of substrate (MAHT) species. The orbital interactions arise due to highly stabilized by inter and intramolecular hydrogen bond interactions. The second-order stabilization energies, 207.25 kcal/mol for N<sub>71</sub> → H<sub>91</sub>-O<sub>95</sub> and 136.49 kcal/mol for O<sub>95</sub> → N<sub>71</sub>-H<sub>91</sub> in Figure S7(a) & S7(b) clearly indicate the prevailing  $n \rightarrow \sigma^*$  interactions as well as proton abstraction to take place from the substrate (MAHT) species to fullerene (C<sub>60</sub>) catalyst via the intermolecular hydrogen bonding interactions.

In  ${}^D F1_{TS2}$ , three orbital interactions were observed, where nitrogen atom of fullerene (C<sub>60</sub>) catalyst acted as donor NBO and the  $\sigma^*(O-H)$  of substrate acted as an acceptor NBO of which, only one interaction had a very strong stabilization energy of 173.62 kcal/mol. Two other interactions showed 108.68 kcal/mol for O<sub>89</sub> → N<sub>71</sub>-H<sub>95</sub> and 44.94 kcal/mol for O<sub>82</sub> → C<sub>83</sub>-O<sub>84</sub> respectively (Table S5 & S6). However, the transition state  ${}^D F1_{TS3}$  was associated with 95.21 kcal/mol stabilization energy from O<sub>84</sub> → C<sub>92</sub>-H<sub>94</sub> interaction and was the lowest perturbed stabilization energy. Consequently,  ${}^D F1_{TS1}$  and  ${}^D F1_{TS2}$  showed slight significant changes in the second-order stabilization energy, due to the influence of cyclic ring functionalized in catalyst F2. In the addition pathway, intermediates and transition states showed  $n \rightarrow \sigma^*$  interactions and their energy ranges were estimated as 50 to 217 kcal/mol, resulting from intermolecular hydrogen bonding interactions (See supporting information Table S5 and S6). On the other hand,  ${}^D F2_{TS1}$ ,  ${}^D F2_{TS2}$  and  ${}^D F2_{TS3}$  were associated with only  $n \rightarrow \sigma^*$  interactions stabilized by 186.95 kcal/mol (N<sub>69</sub> → H<sub>89</sub>-O<sub>93</sub>), 15.91 kcal/mol (O<sub>83</sub> → H<sub>89</sub>-N<sub>69</sub>) and 50.24 kcal/mol (O<sub>82</sub> → H<sub>92</sub>-C<sub>90</sub>), respectively, which could be the major reason for the higher reactivity of the transition states. Overall,  ${}^A F1_{TS4}$  showed relatively higher stabilization energy (by 372.86 kcal/mol) compared to all the other  $n \rightarrow \sigma^*$  interactions. The overall orbital interactions are shown in Figure S7(a) & S7(b). Overall, a good

correlation between the NBO stabilization energies ( $n-\sigma^*$ ) were visualized for all the transition states. It is interesting to observe the NBO analysis to help explain the higher reactivity of  ${}^A\text{F2}_R$ , stabilized by lower energies (2.36 kcal/mol and 4.68 kcal/mol) than all other reactant species of both the pathways (Table S6). To gain more insight into this stabilization, various interactions existing between fullerene ( $\text{C}_{60}$ ) and substrates need to be explained and examined. Overall, the presence of strong hydrogen bonding interactions gripped the key to the variance in the reactivity of the species.

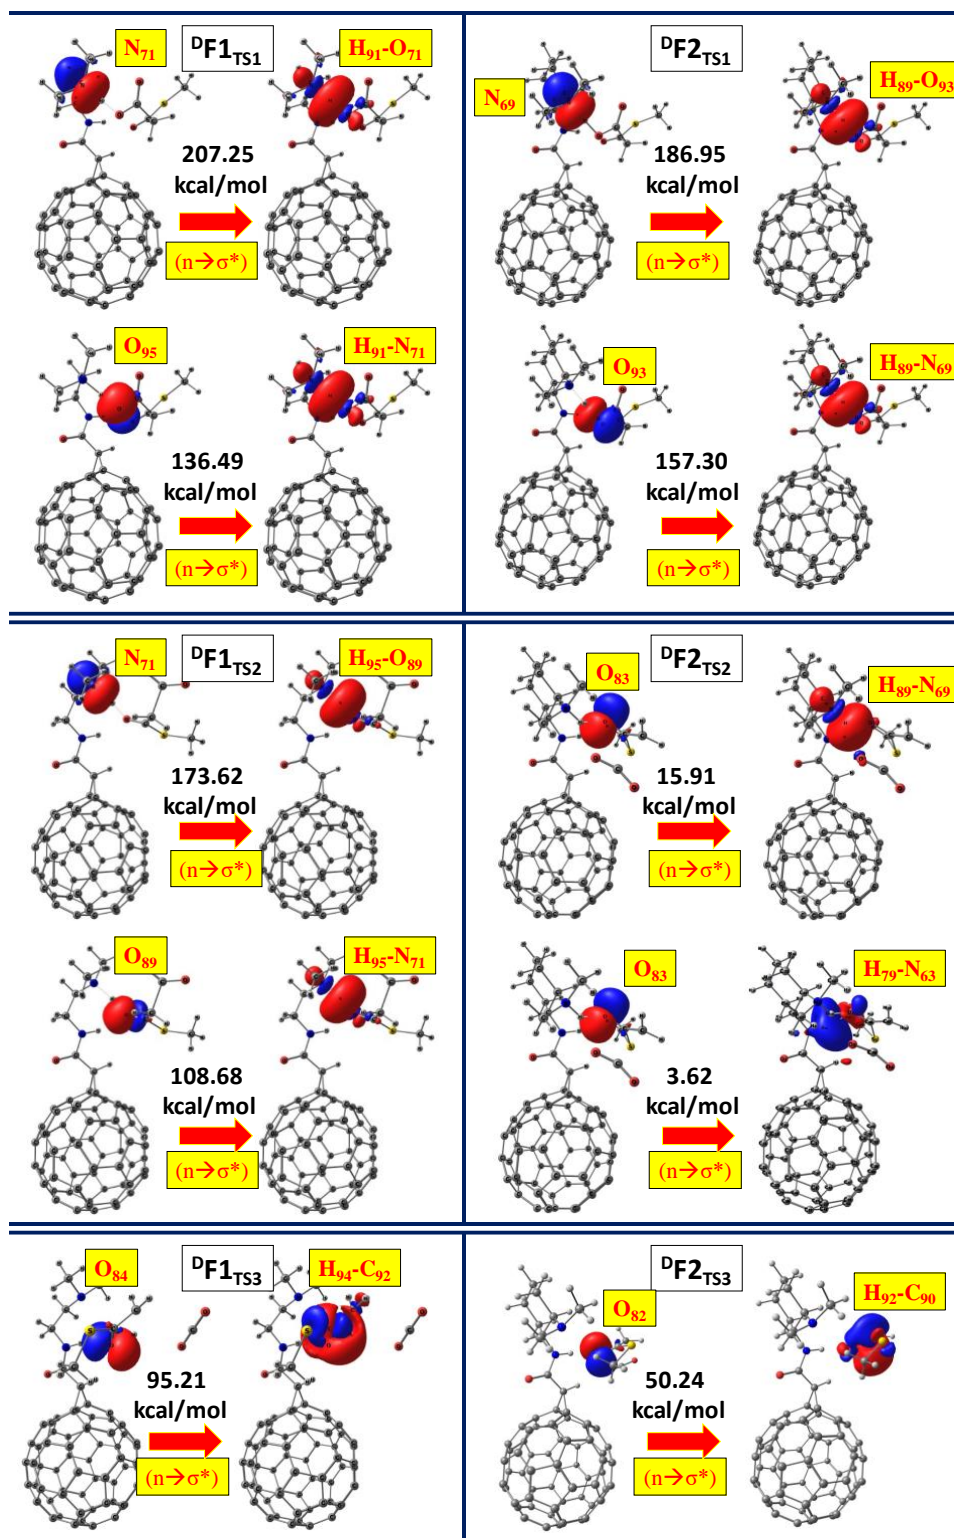

**Figure S7(a).** Natural bond orbitals of strong hydrogen bonding interactions in the respective transition states involved in decarboxylation pathways. Second-order stabilization energies are given in kcal/ mol.



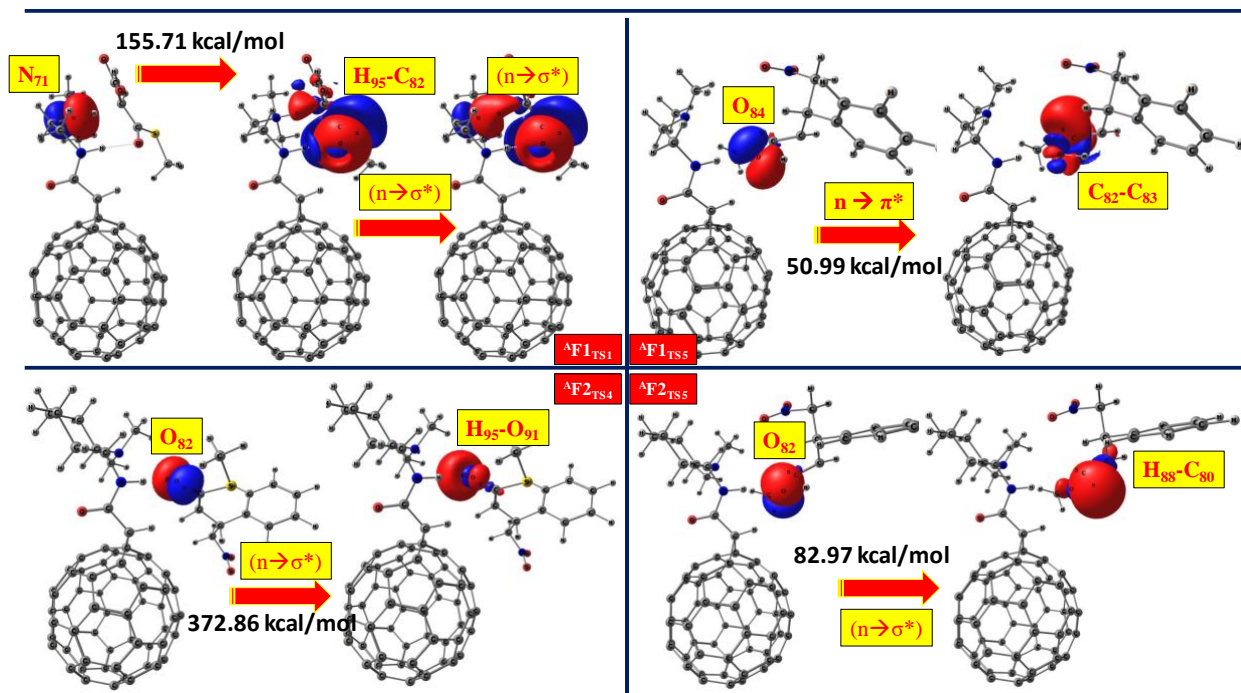

**Figure S7(b).** Natural bond orbitals of showing strong hydrogen bonding interactions in the respective transition states involved in addition pathway. Second-order stabilization energies are given in kcal/mol.

**Table. S5** Computed natural bond analysis (NBO) of all chosen for the transition states (TS's) at both addition and decarboxylation pathways in both the catalysts F1 and F2.

| Pathways                       | Transition States (TS's)          | Possible Interactions                                               | Second-Order Stabilization Energy (E <sub>2</sub> ) in kcal/mol |
|--------------------------------|-----------------------------------|---------------------------------------------------------------------|-----------------------------------------------------------------|
| <b>Catalyst-F1</b>             |                                   |                                                                     |                                                                 |
| Decarboxylation                | <sup>D</sup> F1 <sub>TS1</sub>    | N <sub>71</sub> → H <sub>91</sub>                                   | 207.25                                                          |
|                                |                                   | O <sub>95</sub> → N <sub>71</sub> -H <sub>91</sub>                  | 136.49                                                          |
|                                | <sup>D</sup> F1 <sub>TS2</sub>    | N <sub>71</sub> → H <sub>95</sub>                                   | 173.62                                                          |
|                                |                                   | O <sub>89</sub> → N <sub>71</sub> -H <sub>95</sub>                  | 108.68                                                          |
|                                |                                   | O <sub>82</sub> → C <sub>83</sub> -O <sub>84</sub>                  | 44.94                                                           |
|                                | <sup>D</sup> F1 <sub>TS3</sub>    | O <sub>84</sub> → C <sub>92</sub> -H <sub>94</sub>                  | 95.21                                                           |
| Addition                       | <sup>A</sup> F1 <sub>TS1</sub>    | N <sub>71</sub> → C <sub>82</sub> -H <sub>95</sub>                  | 155.71                                                          |
|                                |                                   | C <sub>82</sub> -H <sub>95</sub> → C <sub>83</sub> -O <sub>84</sub> | 29.51                                                           |
|                                | <sup>A</sup> F1 <sub>TS2</sub>    | C <sub>82</sub> -C <sub>95</sub> → C <sub>83</sub> -O <sub>84</sub> | 34.08                                                           |
|                                | <sup>A</sup> F1 <sub>TS3</sub>    | N <sub>71</sub> → C <sub>97</sub> -H <sub>109</sub>                 | 216.34                                                          |
|                                | <sup>A</sup> F1 <sub>TS4</sub>    | O <sub>91</sub> → C <sub>82</sub> -C <sub>90</sub>                  | 61.25                                                           |
|                                | <sup>A</sup> F1 <sub>TS5</sub>    | O <sub>84</sub> → C <sub>82</sub> -C <sub>83</sub>                  | 50.99                                                           |
|                                |                                   | O <sub>84</sub> → H <sub>90</sub>                                   | 122.79                                                          |
|                                |                                   | C <sub>82</sub> -C <sub>83</sub> → H <sub>90</sub>                  | 114.52                                                          |
| <b>Catalyst-F2</b>             |                                   |                                                                     |                                                                 |
| Decarboxylation                | <sup>D</sup> F2 <sub>TS1</sub>    | N <sub>69</sub> → H <sub>89</sub>                                   | 186.95                                                          |
|                                |                                   | O <sub>93</sub> → H <sub>89</sub>                                   | 157.30                                                          |
|                                | <sup>D</sup> F2 <sub>TS2</sub>    | O <sub>83</sub> → H <sub>89</sub>                                   | 15.91                                                           |
|                                |                                   | O <sub>83</sub> → N <sub>63</sub> -H <sub>79</sub>                  | 3.62                                                            |
|                                | <sup>D</sup> F2 <sub>TS3</sub>    | O <sub>82</sub> → C <sub>90</sub> -H <sub>92</sub>                  | 50.24                                                           |
| Addition                       | <sup>A</sup> F2 <sub>TS1</sub>    | N <sub>69</sub> → C <sub>80</sub> -H <sub>93</sub>                  | 137.56                                                          |
|                                | <sup>A</sup> F2 <sub>TS2</sub>    | O <sub>109</sub> → N <sub>69</sub> -H <sub>107</sub>                | 12.61                                                           |
|                                |                                   | O <sub>89</sub> → N <sub>63</sub> -H <sub>79</sub>                  | 11.61                                                           |
|                                |                                   | O <sub>82</sub> → O <sub>89</sub> -H <sub>91</sub>                  | 24.42                                                           |
|                                | <sup>A</sup> F2 <sub>TS3</sub>    | N <sub>69</sub> → C <sub>95</sub> -H <sub>107</sub>                 | 162.88                                                          |
|                                |                                   | O <sub>90</sub> → C <sub>63</sub> -H <sub>79</sub>                  | 6.55                                                            |
|                                | <sup>A</sup> F2 <sub>TS4</sub>    | O <sub>82</sub> → H <sub>91</sub>                                   | 372.86                                                          |
| <sup>A</sup> F2 <sub>TS5</sub> | O <sub>82</sub> → H <sub>88</sub> | 82.97                                                               |                                                                 |

**Table. S6** Computed natural bond analysis (NBO) of all chosen for the reactive species at both addition and decarboxylation pathways in both the catalysts F1 and F2.

| Pathways                                                | Intermediates                             | Possible Interactions                                    | Second-Order Stabilization Energy ( $E_2$ ) in kcal/mol |
|---------------------------------------------------------|-------------------------------------------|----------------------------------------------------------|---------------------------------------------------------|
| <b>Catalyst-F1</b>                                      |                                           |                                                          |                                                         |
| Decarboxylation                                         | ${}^D\text{F1}_R$                         | $\text{N}_{71} \rightarrow \text{H}_{95}$                | 64.49                                                   |
|                                                         |                                           | $\text{O}_{82} \rightarrow \text{H}_{95}$                | 377.28                                                  |
|                                                         | ${}^D\text{F1}_{\text{INT1}}$             | $\text{N}_{71} \rightarrow \text{H}_{91}$                | 322.28                                                  |
|                                                         | ${}^D\text{F1}_{\text{INT2}}$             | $\text{N}_{71} \rightarrow \text{O}_{84}-\text{H}_{95}$  | 31.46                                                   |
|                                                         | ${}^D\text{F1}_P$                         | $\text{N}_{71} \rightarrow \text{O}_{92}-\text{H}_{95}$  | 3.52                                                    |
|                                                         |                                           | $\text{O}_{84} \rightarrow \text{N}_{63}-\text{H}_{81}$  | 7.16                                                    |
| Addition                                                | ${}^A\text{F1}_R$                         | $\text{N}_{71} \rightarrow \text{C}_{82}-\text{H}_{95}$  | 5.80                                                    |
|                                                         | ${}^A\text{F1}_{\text{INT1}}$             | $\text{N}_{71} \rightarrow \text{H}_{90}$                | 296.46                                                  |
|                                                         |                                           | $\text{O}_{93} \rightarrow \text{H}_{90}$                | 121.38                                                  |
|                                                         | ${}^A\text{F1}_{\text{INT2}}$             | $\text{O}_{102} \rightarrow \text{H}_{91}$               | 87.49                                                   |
|                                                         |                                           | $\text{O}_{101} \rightarrow \text{N}_{63}-\text{H}_{81}$ | 14.61                                                   |
|                                                         | ${}^D\text{F1}_{\text{INT3}}$             | $\text{N}_{71} \rightarrow \text{H}_{93}$                | 93.47                                                   |
| <b>Catalyst-F2</b>                                      |                                           |                                                          |                                                         |
| Decarboxylation                                         | ${}^D\text{F2}_R$                         | $\text{N}_{69} \rightarrow \text{H}_{89}$                | 79.72                                                   |
|                                                         |                                           | $\text{O}_{93} \rightarrow \text{H}_{89}$                | 348.08                                                  |
|                                                         | ${}^D\text{F2}_{\text{INT1}}$             | $\text{N}_{69} \rightarrow \text{H}_{84}$                | 357.31                                                  |
|                                                         |                                           | $\text{O}_{83} \rightarrow \text{H}_{84}$                | 50.19                                                   |
|                                                         | ${}^D\text{F2}_{\text{INT2}}$             | $\text{N}_{69} \rightarrow \text{O}_{82}-\text{H}_{93}$  | 24.41                                                   |
|                                                         | ${}^D\text{F2}_P$                         | $\text{N}_{69} \rightarrow \text{C}_{90}-\text{H}_{93}$  | 2.31                                                    |
| $\text{O}_{82} \rightarrow \text{N}_{63}-\text{H}_{79}$ |                                           | 6.79                                                     |                                                         |
| Addition                                                | ${}^A\text{F2}_R$                         | $\text{N}_{69} \rightarrow \text{C}_{80}-\text{H}_{93}$  | 2.36                                                    |
|                                                         |                                           | $\text{O}_{69} \rightarrow \text{N}_{63}-\text{H}_{79}$  | 4.68                                                    |
|                                                         | ${}^A\text{F2}_{\text{INT1}}$             | $\text{O}_{91} \rightarrow \text{N}_{63}-\text{H}_{79}$  | 5.03                                                    |
|                                                         |                                           | $\text{O}_{91} \rightarrow \text{H}_{88}$                | 91.44                                                   |
|                                                         |                                           | $\text{O}_{82} \rightarrow \text{O}_{90}-\text{H}_{88}$  | 30.51                                                   |
|                                                         | ${}^A\text{F2}_{\text{INT2}}$             | $\text{O}_{100} \rightarrow \text{H}_{89}$               | 44.87                                                   |
| $\text{O}_{99} \rightarrow \text{N}_{63}-\text{H}_{79}$ |                                           | 13.13                                                    |                                                         |
| ${}^A\text{F2}_{\text{INT3}}$                           | $\text{N}_{69} \rightarrow \text{H}_{91}$ | 81.00                                                    |                                                         |

## 1.7 IRC Analysis

### Catalyst-F1

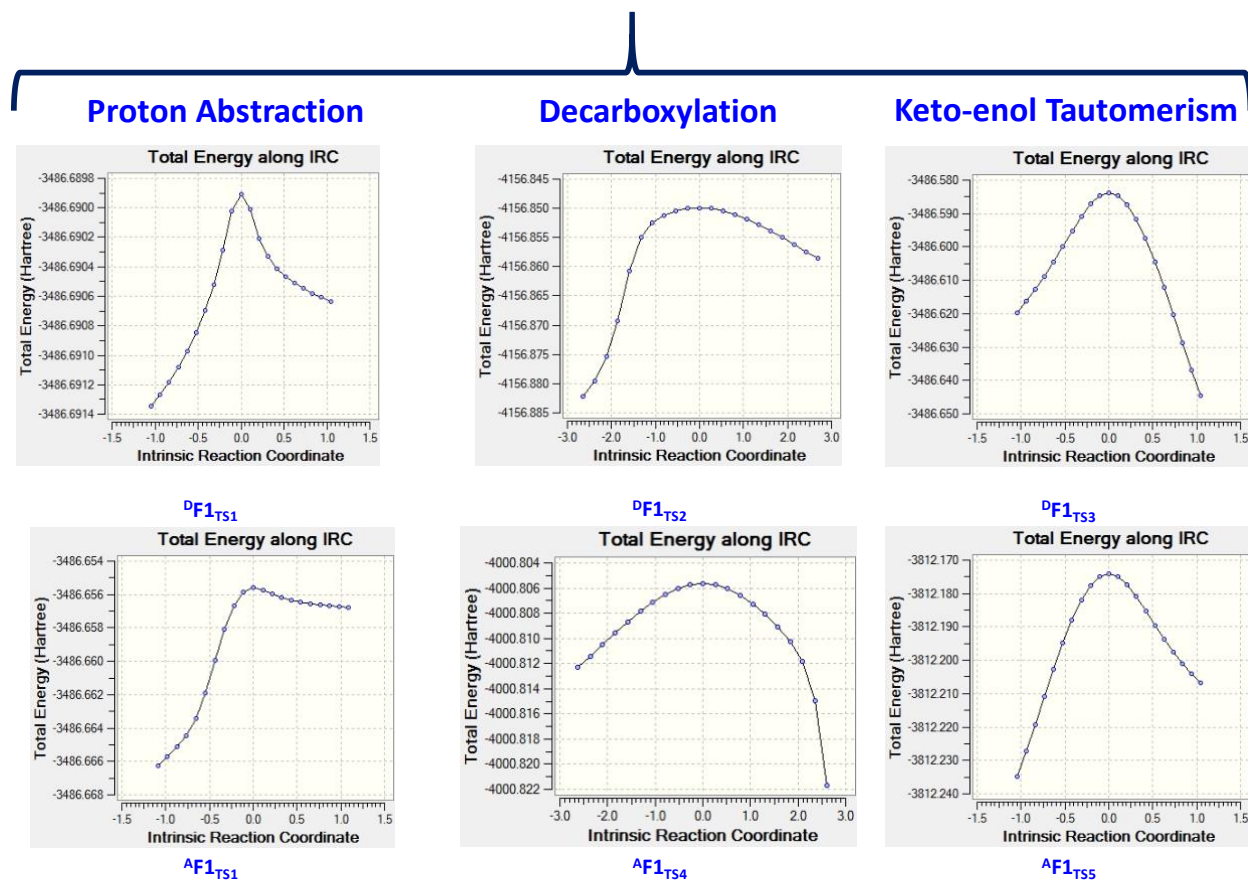

**Figure S8.** Selected Intrinsic reaction coordinate (IRC) analysis involved at catalyst F1 in decarboxylation and addition pathways.

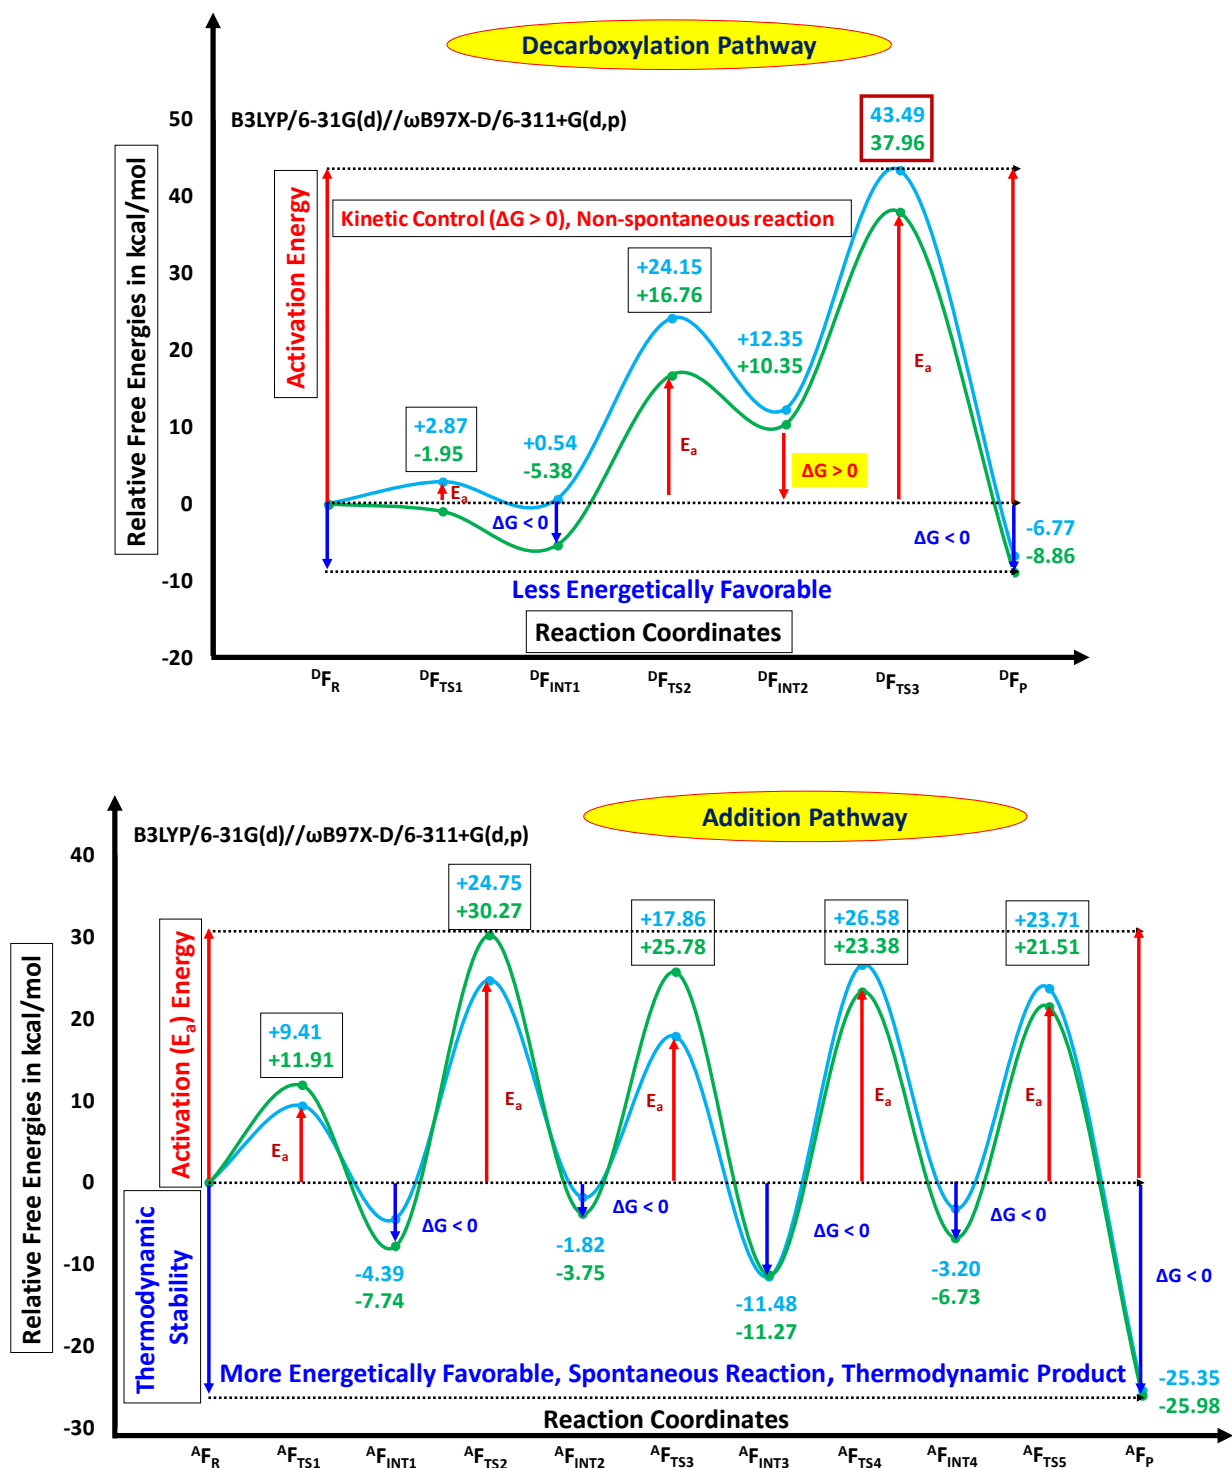

**Figure S9.** Energetic favorability (under thermodynamic vs kinetic controls) for the decarboxylation and addition pathways at B3LYP/6-31G(d)//ωB97X-D/6-311+G(d,p). The horizontal axis is a reaction coordinate, and the vertical axis represents Gibbs energy in kcal/mol.

## References

- 1 López-Andarias, J.; Frontera, A.; and Matile, S.; *J. Am. Chem. Soc.* **2017**, *139*, 13296–13299.
- 2 Panneerselvam, M.; Deepankumar, Madhu.; Jaccob, Madhavan.; Solomon, R. V. *ChemistrySelect* **2018**, *3*, 1321–1334.
- 3 Deepankumar, Madhu.; Jaccob, Madhavan., *Phys. Chem. Chem. Phys.*, **2021**, *23*, 7386-7397.

### Cartesian Coordinates of Ground State Optimized Structures

| $DF_{1R}$ |              |              |              | $DF_{1INT1}$ |              |              |              |
|-----------|--------------|--------------|--------------|--------------|--------------|--------------|--------------|
| 6         | -1.943777000 | -1.092882000 | -3.321891000 | 6            | -5.554116000 | -0.723772000 | -0.656038000 |
| 6         | -3.102852000 | -0.216103000 | -3.367823000 | 6            | -3.461489000 | 3.258973000  | -0.368552000 |
| 6         | -2.945290000 | 1.160532000  | -3.213934000 | 6            | -4.934971000 | 1.257370000  | -1.760857000 |
| 6         | -1.619878000 | 1.718281000  | -3.003502000 | 6            | -2.365444000 | 1.078384000  | 3.429776000  |
| 6         | -0.507572000 | 0.873982000  | -2.947726000 | 6            | 2.636815000  | -0.334438000 | -1.241392000 |
| 6         | -0.668822000 | -0.559128000 | -3.109453000 | 6            | 3.468794000  | -4.542336000 | -1.594458000 |
| 6         | -2.322650000 | -2.309730000 | -2.645907000 | 7            | 4.805677000  | -1.283328000 | -1.652272000 |
| 6         | -3.720160000 | -2.196399000 | -2.264917000 | 8            | 2.990200000  | -2.653199000 | -1.805807000 |
| 6         | -4.203833000 | -0.900374000 | -2.712587000 | 6            | 5.760955000  | -2.362916000 | -1.850425000 |
| 6         | -5.101462000 | -0.178136000 | -1.923574000 | 1            | 5.390375000  | -2.995651000 | -2.662526000 |
| 6         | -3.877948000 | 1.913623000  | -2.394335000 | 1            | 6.704354000  | -1.920474000 | -2.183038000 |
| 6         | -1.728441000 | 2.810289000  | -2.065200000 | 6            | 5.957125000  | -3.270347000 | -0.624853000 |
| 6         | -0.718713000 | 3.006724000  | -1.116467000 | 1            | 6.575257000  | -4.135531000 | -0.924041000 |
| 6         | 0.443941000  | 2.141419000  | -1.086428000 | 1            | 4.974080000  | -3.654840000 | -0.339465000 |
| 6         | 0.556512000  | 1.108882000  | -2.004829000 | 7            | 6.548576000  | -2.606383000 | 0.555226000  |
| 6         | 1.203695000  | -0.198052000 | -1.687877000 | 1            | 3.183810000  | 0.604881000  | -1.237626000 |
| 6         | 0.297878000  | -1.233045000 | -2.274806000 | 6            | 7.967960000  | -2.269434000 | 0.359861000  |
| 6         | -0.081740000 | -2.381184000 | -1.597877000 | 1            | 8.584953000  | -3.174264000 | 0.233281000  |
| 6         | -1.407977000 | -2.929337000 | -1.788132000 | 1            | 8.088599000  | -1.639289000 | -0.524713000 |
| 6         | -4.155247000 | -2.718050000 | -1.046064000 | 1            | 8.319857000  | -1.698116000 | 1.221185000  |
| 6         | -3.208736000 | -3.375605000 | -0.158763000 | 6            | 6.391236000  | -3.443351000 | 1.754809000  |
| 6         | -1.865583000 | -3.473567000 | -0.521756000 | 1            | 6.794270000  | -2.909450000 | 2.620521000  |
| 6         | -0.822260000 | -3.253529000 | 0.464356000  | 1            | 5.329280000  | -3.640732000 | 1.927896000  |
| 6         | 0.286536000  | -2.584122000 | -0.185718000 | 1            | 6.917897000  | -4.406918000 | 1.658966000  |
| 6         | 1.018814000  | -1.629879000 | 0.504219000  | 1            | 5.134642000  | -0.383487000 | -1.318802000 |
| 6         | 1.598862000  | -0.416375000 | -0.146171000 | 8            | 5.213504000  | -0.340927000 | 1.142354000  |
| 6         | 1.278450000  | 0.711313000  | 0.774806000  | 6            | 6.008098000  | 0.622567000  | 1.594146000  |
| 6         | 0.811779000  | 1.939381000  | 0.330181000  | 8            | 7.151095000  | 0.474120000  | 1.982301000  |
| 6         | -3.124545000 | 2.934619000  | -1.683378000 | 6            | 5.327806000  | 1.986250000  | 1.515090000  |
| 6         | -1.975066000 | 2.299661000  | 2.743316000  | 1            | 4.262306000  | 1.883031000  | 1.754234000  |
| 6         | -2.875434000 | 2.934929000  | 1.887194000  | 1            | 5.791892000  | 2.674545000  | 2.224332000  |
| 6         | -4.200459000 | 2.379524000  | 1.683270000  | 6            | 5.410265000  | 2.535467000  | 0.092294000  |
| 6         | -4.574540000 | 1.205269000  | 2.339754000  | 8            | 5.315808000  | 1.845612000  | -0.906576000 |
| 6         | -3.638534000 | 0.541336000  | 3.230003000  | 16           | 5.636103000  | 4.309567000  | 0.051534000  |
| 6         | -1.208646000 | 0.201480000  | 3.473074000  | 6            | 5.583609000  | 4.626004000  | -1.747313000 |
| 6         | -0.109864000 | 0.884591000  | 2.811355000  | 1            | 6.490516000  | 5.157189000  | -2.041712000 |
| 6         | -0.578275000 | 2.175322000  | 2.364166000  | 1            | 5.532590000  | 3.657827000  | -2.251061000 |
| 6         | -0.133308000 | 2.684201000  | 1.138788000  | 1            | 4.703042000  | 5.223843000  | -1.989606000 |
| 6         | -1.073684000 | 3.344687000  | 0.250742000  | 1            | 5.747481000  | -1.209109000 | 0.976657000  |
| 6         | -2.414061000 | 3.472764000  | 0.617276000  |              |              |              |              |
| 6         | -4.562857000 | 2.579861000  | 0.288526000  |              |              |              |              |
| 6         | -5.284315000 | 1.597397000  | -0.392736000 |              |              |              |              |
| 6         | -5.668756000 | 0.373449000  | 0.290432000  |              |              |              |              |
| 6         | -5.321585000 | 0.181557000  | 1.628150000  |              |              |              |              |
| 6         | -4.843921000 | -1.115848000 | 2.076972000  |              |              |              |              |
| 6         | -3.804689000 | -0.894146000 | 3.066981000  |              |              |              |              |
| 6         | -2.691196000 | -1.735740000 | 3.109487000  |              |              |              |              |
| 6         | -1.367229000 | -1.174502000 | 3.313816000  |              |              |              |              |
| 6         | 0.780546000  | 0.163207000  | 2.011402000  |              |              |              |              |
| 6         | 0.617895000  | -1.269057000 | 1.844644000  |              |              |              |              |
| 6         | -0.433727000 | -1.926171000 | 2.490314000  |              |              |              |              |
| 6         | -1.171649000 | -2.945062000 | 1.783107000  |              |              |              |              |
| 6         | -2.569960000 | -2.831412000 | 2.161492000  |              |              |              |              |
| 6         | -3.568807000 | -3.041418000 | 1.210074000  |              |              |              |              |
| 6         | -4.727828000 | -2.169242000 | 1.167780000  |              |              |              |              |
| 6         | -5.090257000 | -1.969174000 | -0.227229000 |              |              |              |              |









|   |              |              |              |
|---|--------------|--------------|--------------|
| 6 | -8.458749000 | -2.743693000 | -0.976066000 |
| 1 | -9.225655000 | -3.527787000 | -0.966902000 |
| 1 | -8.993067000 | -1.784159000 | -1.030912000 |
| 6 | -7.550959000 | -2.892794000 | -2.201297000 |
| 1 | -8.130215000 | -2.787370000 | -3.126591000 |
| 1 | -7.119081000 | -3.903748000 | -2.215077000 |

DF2<sub>INT1</sub>

|   |              |              |              |
|---|--------------|--------------|--------------|
| 6 | 0.699053000  | 0.853495000  | 2.896833000  |
| 6 | 1.763763000  | 1.843892000  | 2.879318000  |
| 6 | 1.798365000  | 2.814774000  | 1.879116000  |
| 6 | 0.768916000  | 2.836877000  | 0.852947000  |
| 6 | -0.248284000 | 1.876868000  | 0.862841000  |
| 6 | -0.284912000 | 0.864518000  | 1.902966000  |
| 6 | 1.258571000  | -0.406146000 | 3.324332000  |
| 6 | 2.676316000  | -0.207223000 | 3.572789000  |
| 6 | 2.989232000  | 1.185727000  | 3.297558000  |
| 6 | 4.202052000  | 1.523703000  | 2.693354000  |
| 6 | 3.058810000  | 3.168550000  | 1.250221000  |
| 6 | 1.383608000  | 3.202554000  | -0.401212000 |
| 6 | 0.951774000  | 2.589988000  | -1.583061000 |
| 6 | -0.122268000 | 1.618282000  | -1.563289000 |
| 6 | -0.728264000 | 1.288703000  | -0.362225000 |
| 6 | -1.241411000 | -0.079053000 | -0.060431000 |
| 6 | -0.795515000 | -0.363198000 | 1.337798000  |
| 6 | -0.231836000 | -1.569199000 | 1.725869000  |
| 6 | 0.807142000  | -1.591508000 | 2.734741000  |
| 6 | 3.590162000  | -1.205692000 | 3.233070000  |
| 6 | 3.121912000  | -2.445030000 | 2.632691000  |
| 6 | 1.761610000  | -2.629124000 | 2.385633000  |
| 6 | 1.318886000  | -3.248185000 | 1.148522000  |
| 6 | 0.088590000  | -2.608124000 | 0.731924000  |
| 6 | -0.166033000 | -2.404934000 | -0.615493000 |
| 6 | -0.896721000 | -1.210984000 | -1.141518000 |
| 6 | -0.097163000 | -1.754881000 | -2.317356000 |
| 6 | 0.199171000  | 0.577245000  | -2.558872000 |
| 6 | 2.801651000  | 3.407493000  | -0.161147000 |
| 6 | 3.807493000  | 0.152251000  | -3.277646000 |
| 6 | 4.249000000  | 1.345508000  | -2.704371000 |
| 6 | 5.280178000  | 1.323833000  | -1.683751000 |
| 6 | 5.830206000  | 0.108451000  | -1.270903000 |
| 6 | 5.371710000  | -1.134825000 | -1.865349000 |
| 6 | 3.317218000  | -2.101347000 | -2.828348000 |
| 6 | 2.090484000  | -1.440644000 | -3.241609000 |
| 6 | 2.390356000  | -0.056232000 | -3.520246000 |
| 6 | 1.463958000  | 0.932379000  | -3.170606000 |
| 6 | 1.927822000  | 2.172997000  | -2.574487000 |
| 6 | 3.289365000  | 2.379312000  | -2.350546000 |
| 6 | 4.963067000  | 2.349437000  | -0.701490000 |
| 6 | 5.209341000  | 2.117960000  | 0.653430000  |
| 6 | 5.776760000  | 0.850381000  | 1.082251000  |
| 6 | 6.080586000  | -0.133275000 | 0.140314000  |
| 6 | 5.773447000  | -1.526782000 | 0.418014000  |
| 6 | 5.336395000  | -2.146116000 | -0.820891000 |
| 6 | 4.312138000  | -3.095200000 | -0.802416000 |
| 6 | 3.281969000  | -3.069853000 | -1.826111000 |
| 6 | 0.878925000  | -1.768762000 | -2.626483000 |
| 6 | 0.839744000  | -2.776850000 | -1.583274000 |
| 6 | 2.019453000  | -3.420024000 | -1.195344000 |
| 6 | 2.264994000  | -3.663040000 | 0.205679000  |
| 6 | 3.682096000  | -3.461899000 | 0.455525000  |
| 6 | 4.103029000  | -2.864807000 | 1.644482000  |

|    |              |              |              |
|----|--------------|--------------|--------------|
| 6  | 5.169039000  | -1.880583000 | 1.626149000  |
| 6  | 4.851870000  | -0.854688000 | 2.608270000  |
| 6  | 5.152308000  | 0.482886000  | 2.342435000  |
| 6  | 3.736320000  | 3.004468000  | -1.115910000 |
| 6  | 4.237502000  | 2.534925000  | 1.648872000  |
| 6  | 4.381747000  | -1.113483000 | -2.849772000 |
| 6  | -2.315702000 | -0.769031000 | -0.875319000 |
| 6  | -3.305575000 | -1.676451000 | -0.194152000 |
| 7  | -4.591990000 | -1.497517000 | -0.616419000 |
| 8  | -2.999457000 | -2.484418000 | 0.681848000  |
| 6  | -5.674684000 | -2.231034000 | 0.019500000  |
| 1  | -5.330856000 | -2.490137000 | 1.027903000  |
| 6  | -6.965676000 | -1.389406000 | -0.116372000 |
| 1  | -7.321173000 | -1.178747000 | -0.899375000 |
| 7  | -6.702066000 | 0.007838000  | 0.675003000  |
| 1  | -2.732710000 | -0.126947000 | -1.652300000 |
| 6  | -5.945350000 | 0.060548000  | 1.960634000  |
| 1  | -6.542239000 | -0.386794000 | 2.758598000  |
| 1  | -5.002367000 | -0.473786000 | 1.853364000  |
| 1  | -5.745143000 | 1.110076000  | 2.177755000  |
| 6  | -7.933501000 | 0.852199000  | 0.746721000  |
| 1  | -7.603599000 | 1.883521000  | 0.875427000  |
| 1  | -8.476331000 | 0.755943000  | -0.195044000 |
| 1  | -8.561782000 | 0.539715000  | 1.582087000  |
| 1  | -4.828452000 | -0.733156000 | -1.265100000 |
| 6  | -5.299228000 | 3.251223000  | -1.599078000 |
| 1  | -4.789885000 | 3.937146000  | -2.278450000 |
| 6  | -4.851500000 | 1.786448000  | -1.923998000 |
| 8  | -5.680303000 | 0.872818000  | -1.555227000 |
| 1  | -6.131104000 | 0.490135000  | -0.097074000 |
| 1  | -6.383684000 | 3.332911000  | -1.716608000 |
| 6  | -4.957388000 | 3.552155000  | -0.158573000 |
| 8  | -5.571173000 | 3.088812000  | 0.792609000  |
| 16 | -3.520119000 | 4.604839000  | 0.015031000  |
| 6  | -3.317251000 | 4.632268000  | 1.829213000  |
| 1  | -2.426978000 | 4.064127000  | 2.107355000  |
| 1  | -3.217744000 | 5.667563000  | 2.160948000  |
| 1  | -4.208104000 | 4.178266000  | 2.269785000  |
| 8  | -3.761073000 | 1.623478000  | -2.470789000 |
| 6  | -8.049357000 | -2.159591000 | 0.884456000  |
| 1  | -8.970649000 | -1.571016000 | 0.947491000  |
| 1  | -7.713068000 | -2.347844000 | -1.913174000 |
| 6  | -5.986284000 | -3.558811000 | -0.703730000 |
| 1  | -6.285929000 | -3.342464000 | -1.738578000 |
| 1  | -5.057159000 | -4.135170000 | -0.751004000 |
| 6  | -8.351525000 | -3.501785000 | 0.192225000  |
| 1  | -8.798372000 | -3.302439000 | -0.792112000 |
| 1  | -9.106030000 | -4.044647000 | 0.773290000  |
| 6  | -7.085201000 | -4.349442000 | -0.017472000 |
| 1  | -7.317477000 | -5.266194000 | -0.536899000 |
| 1  | -6.717657000 | -4.665581000 | 1.004061000  |

DF2<sub>INT2</sub>

|   |             |              |              |
|---|-------------|--------------|--------------|
| 6 | 2.012752000 | 2.591409000  | -2.345775000 |
| 6 | 3.261994000 | 2.035846000  | -2.841236000 |
| 6 | 3.286597000 | 0.758891000  | -3.400234000 |
| 6 | 2.061438000 | -0.018181000 | -3.484573000 |
| 6 | 0.863178000 | 0.511978000  | -2.998130000 |
| 6 | 0.834694000 | 1.841407000  | -2.416658000 |
| 6 | 2.296821000 | 3.351616000  | -1.152618000 |
| 6 | 3.725051000 | 3.271833000  | -0.897603000 |
| 6 | 4.322889000 | 2.457568000  | -1.943197000 |

|   |              |              |              |      |              |               |              |
|---|--------------|--------------|--------------|------|--------------|---------------|--------------|
| 6 | 5.364983000  | 1.580168000  | -1.636323000 | 1    | -8.459316000 | 0.923213000   | 1.576099000  |
| 6 | 4.369837000  | -0.154973000 | -3.082971000 | 1    | -7.936834000 | 0.351994000   | -0.026695000 |
| 6 | 2.380860000  | -1.402309000 | -3.225744000 | 1    | -7.761130000 | -0.699976000  | 1.381626000  |
| 6 | 1.486658000  | -2.191185000 | -2.493462000 | 6    | -6.038642000 | 0.872128000   | 2.702353000  |
| 6 | 0.234814000  | -1.637376000 | -2.017170000 | 1    | -6.195555000 | -0.123116000  | 3.130343000  |
| 6 | -0.079677000 | -0.315297000 | -2.289601000 | 1    | -4.994556000 | 1.158140000   | 2.860592000  |
| 6 | -0.847773000 | 0.546714000  | -1.344410000 | 1    | -6.681445000 | 1.580459000   | 3.249725000  |
| 6 | -0.132102000 | 1.859826000  | -1.343529000 | 1    | -4.704931000 | 0.092296000   | -1.288041000 |
| 6 | 0.160513000  | 2.561388000  | -0.184395000 | 8    | -7.617533000 | -3.152623000  | -1.789084000 |
| 6 | 1.389586000  | 3.321398000  | -0.088682000 | 6    | -4.597463000 | -2.399150000  | 0.742998000  |
| 6 | 4.194762000  | 3.175916000  | 0.412815000  | 8    | -5.393210000 | -1.522733000  | 0.066579000  |
| 6 | 3.253972000  | 3.157917000  | 1.521867000  | 16   | -4.526542000 | -4.020903000  | -0.00331400  |
| 6 | 1.883230000  | 3.224394000  | 1.273810000  | 6    | -4.141084000 | -3.611132000  | -1.747145000 |
| 6 | 0.961794000  | 2.391769000  | 2.026800000  | 1    | -4.900581000 | -2.948764000  | -2.165318000 |
| 6 | -0.107614000 | 1.978487000  | 1.141946000  | 1    | -3.144195000 | -3.170560000  | -1.835442000 |
| 6 | -0.660234000 | 0.713389000  | 1.265877000  | 1    | -4.158212000 | -4.558899000  | -2.291352000 |
| 6 | -1.140718000 | -0.086065000 | 0.096633000  | 6    | -7.887290000 | -3.190249000  | -0.651688000 |
| 6 | -0.607865000 | -1.461912000 | 0.320024000  | 8    | -8.204290000 | -3.225697000  | 0.473081000  |
| 6 | -0.035231000 | -2.222274000 | -0.687373000 | 6    | -3.970149000 | -2.155007000  | 1.902717000  |
| 6 | 3.808928000  | -1.492470000 | -2.974952000 | 1    | -3.325115000 | -2.3971745000 | 2.346632000  |
| 6 | 2.967655000  | -3.319408000 | 1.181410000  | 1    | -4.099295000 | -1.216208000  | 2.432512000  |
| 6 | 3.863557000  | -3.304708000 | 0.111518000  | 1    | -5.526723000 | -0.664070000  | 0.579066000  |
| 6 | 5.089117000  | -2.532738000 | 0.199928000  | 6    | -5.414215000 | 3.293480000   | -1.615721000 |
| 6 | 5.371882000  | -1.799925000 | 1.354380000  | 1    | -4.481508000 | 3.722242000   | -1.238026000 |
| 6 | 4.440427000  | -1.812679000 | 2.468733000  | 1    | -5.264442000 | 3.084118000   | -2.681620000 |
| 6 | 2.016253000  | -2.000696000 | 2.877832000  | 6    | -6.555011000 | 4.295569000   | -1.409480000 |
| 6 | 0.956775000  | -2.417728000 | 1.974809000  | 1    | -7.477811000 | 3.924384000   | -1.880378000 |
| 6 | 1.539249000  | -3.230856000 | 0.933160000  | 1    | -6.307746000 | 5.239647000   | -1.909809000 |
| 6 | 1.057973000  | -3.122028000 | -0.376043000 | 6    | -7.145293000 | 3.195531000   | 0.773646000  |
| 6 | 1.993453000  | -3.107082000 | -1.486735000 | 1    | -8.081625000 | 2.817966000   | 0.341856000  |
| 6 | 3.365547000  | -3.201164000 | -1.250659000 | 1    | -7.336414000 | 3.356803000   | 1.841931000  |
| 6 | 5.354231000  | -1.957067000 | -1.109751000 | 6    | -6.805831000 | 4.524132000   | 0.085038000  |
| 6 | 5.890998000  | -0.671980000 | -1.211412000 | 1    | -7.625114000 | 5.237742000   | 0.236186000  |
| 6 | 6.180037000  | 0.091563000  | -0.009021000 | 1    | -5.910991000 | 4.966743000   | 0.544443000  |
| 6 | 5.925932000  | -0.460573000 | 1.246916000  |      |              |               |              |
| 6 | 5.333955000  | 0.355202000  | 2.294252000  |      |              |               |              |
| 6 | 4.416794000  | -0.479757000 | 3.049786000  | DF2p |              |               |              |
| 6 | 3.216866000  | 0.054537000  | 3.523791000  | 6    | -2.338263000 | -2.723827000  | -2.106663000 |
| 6 | 1.992674000  | -0.721908000 | 3.432778000  | 6    | -3.572847000 | -2.134049000  | -2.599065000 |
| 6 | -0.078993000 | -1.534673000 | 1.658024000  | 6    | -3.546947000 | -0.908572000  | -3.263348000 |
| 6 | -0.106408000 | -0.203421000 | 2.235226000  | 6    | -2.283071000 | -0.218454000  | -3.459200000 |
| 6 | 0.908762000  | 0.192645000  | 3.111651000  | 6    | -1.098378000 | -0.779965000  | -2.975097000 |
| 6 | 1.455564000  | 1.523946000  | 3.006149000  | 6    | -1.122441000 | -2.056363000  | -2.285172000 |
| 6 | 2.884212000  | 1.444817000  | 3.259103000  | 6    | -2.614560000 | -3.364556000  | -0.843782000 |
| 6 | 3.766147000  | 2.244601000  | 2.531337000  | 6    | -4.023174000 | -3.175012000  | -0.541770000 |
| 6 | 5.014632000  | 1.690838000  | 2.041452000  | 6    | -4.616992000 | -2.413905000  | -1.628882000 |
| 6 | 5.279684000  | 2.266668000  | 0.731633000  | 6    | -5.591765000 | -1.451406000  | -1.357957000 |
| 6 | 5.853311000  | 1.483317000  | -0.271924000 | 6    | -4.559965000 | 0.093674000   | -2.983315000 |
| 6 | 4.292035000  | -2.373439000 | -2.006497000 | 6    | -2.509339000 | 1.199503000   | -3.306900000 |
| 6 | 5.388793000  | 0.247325000  | -2.217512000 | 6    | -1.539438000 | 1.988717000   | -2.678963000 |
| 6 | 3.263337000  | -2.558708000 | 2.385283000  | 6    | -0.302261000 | 1.399790000   | -2.206030000 |
| 6 | -2.251729000 | 0.230655000  | -0.875404000 | 6    | -0.078420000 | 0.042218000   | -2.375097000 |
| 6 | -3.245571000 | 1.335502000  | -0.608554000 | 6    | 0.681759000  | -0.787189000  | -1.395029000 |
| 7 | -4.501344000 | 1.059411000  | -1.068353000 | 6    | -0.112147000 | -2.046512000  | -1.252827000 |
| 8 | -2.926074000 | 2.385530000  | -0.056790000 | 6    | -0.395409000 | -2.630837000  | -0.028378000 |
| 6 | -5.657759000 | 1.950926000  | -0.891235000 | 6    | -1.661809000 | -3.301961000  | 0.178218000  |
| 1 | -6.491032000 | 1.442442000  | -1.393275000 | 6    | -4.429459000 | -2.942737000  | 0.772777000  |
| 6 | -6.028469000 | 2.142578000  | 0.603658000  | 6    | -3.442059000 | -2.891725000  | 1.839384000  |
| 1 | -5.124446000 | 2.520528000  | 1.091022000  | 6    | -2.089585000 | -3.062781000  | 1.545333000  |
| 7 | -6.327921000 | 0.831827000  | 1.261680000  | 6    | -1.089229000 | -2.229374000  | 2.188909000  |
| 1 | -2.666131000 | -0.656446000 | -1.348655000 | 6    | -0.036367000 | -1.958315000  | 1.232219000  |
| 6 | -7.697824000 | 0.337082000  | 1.040754000  | 6    | 0.594000000  | -0.723543000  | 1.226837000  |
|   |              |              |              | 6    | 1.071740000  | -0.053982000  | -0.022051000 |

|    |              |              |              |                              |              |              |              |              |
|----|--------------|--------------|--------------|------------------------------|--------------|--------------|--------------|--------------|
| 6  | 0.629017000  | 1.365574000  | 0.104191000  | 8                            | 8.925006000  | 3.053392000  | 1.468410000  |              |
| 6  | 0.057165000  | 2.074222000  | -0.942091000 | 6                            | 4.589513000  | 2.023815000  | 0.407559000  |              |
| 6  | -3.917388000 | 1.398173000  | -3.010217000 | 1                            | 4.993313000  | 2.752702000  | 1.114754000  |              |
| 6  | -2.792624000 | 3.505584000  | 0.941596000  | 1                            | 3.497903000  | 2.131075000  | 0.384411000  |              |
| 6  | -3.732711000 | 3.457606000  | -0.088540000 | 1                            | 4.824273000  | 1.001010000  | 0.730706000  |              |
| 6  | -4.996567000 | 2.773317000  | 0.111450000  | 6                            | 5.194132000  | -3.732931000 | -1.530931000 |              |
| 6  | -5.271690000 | 2.156916000  | 1.333837000  | 1                            | 4.259215000  | -4.141985000 | -1.135094000 |              |
| 6  | -4.294085000 | 2.203721000  | 2.406943000  | 1                            | 5.045089000  | -3.571060000 | -2.605482000 |              |
| 6  | -1.847682000 | 2.274516000  | 2.706176000  | 6                            | 6.336920000  | -4.724950000 | -1.283751000 |              |
| 6  | -0.805567000 | 2.549360000  | 1.731314000  | 1                            | 6.094058000  | -5.689702000 | -1.746139000 |              |
| 6  | -1.383820000 | 3.307492000  | 0.647111000  | 1                            | 7.256827000  | -4.367837000 | -1.771313000 |              |
| 6  | -0.966536000 | 3.062387000  | -0.666028000 | 6                            | 6.904724000  | -3.538622000 | 0.865503000  |              |
| 6  | -1.948320000 | 3.014205000  | -1.735222000 | 1                            | 7.839680000  | -3.732931000 | 0.434749000  |              |
| 6  | -3.300934000 | 3.212005000  | -1.455423000 | 1                            | 7.085098000  | -3.661573000 | 1.941024000  |              |
| 6  | -5.351104000 | 2.109561000  | -1.133753000 | 6                            | 6.594950000  | -4.895151000 | 0.218029000  |              |
| 6  | -5.966080000 | 0.856279000  | -1.105666000 | 1                            | 7.426052000  | -5.590663000 | 0.390665000  |              |
| 6  | -6.247329000 | 0.213546000  | 0.167334000  | 1                            | 5.708290000  | -5.338584000 | 0.692962000  |              |
| 6  | -5.907669000 | 0.850248000  | 1.361558000  |                              |              |              |              |              |
| 6  | -5.319650000 | 0.088258000  | 2.450822000  |                              |              |              |              |              |
| 6  | -4.323296000 | 0.924119000  | 3.097352000  | <sup>A</sup> F1 <sub>R</sub> | 6            | -1.814391000 | -1.732233000 | -3.024239000 |
| 6  | -3.137293000 | 0.357307000  | 3.568682000  | 6                            | -2.952194000 | -0.899231000 | -3.379295000 |              |
| 6  | -1.874818000 | 1.046406000  | 3.365478000  | 6                            | -2.797516000 | 0.480777000  | -3.503574000 |              |
| 6  | 0.161912000  | 1.580356000  | 1.450983000  | 6                            | -1.496771000 | 1.086722000  | -3.273616000 |              |
| 6  | 0.136562000  | 0.301473000  | 2.136345000  | 6                            | -0.406432000 | 0.286935000  | -2.920419000 |              |
| 6  | -0.861141000 | 0.043026000  | 3.081607000  | 6                            | -0.564513000 | -1.149794000 | -2.792121000 |              |
| 6  | -1.488719000 | -1.255761000 | 3.110175000  | 6                            | -2.277324000 | -2.783659000 | -2.151455000 |              |
| 6  | -2.898060000 | -1.067882000 | 3.409891000  | 6                            | -3.706541000 | -2.609486000 | -1.956248000 |              |
| 6  | -3.855876000 | -1.868651000 | 2.786834000  | 6                            | -4.124934000 | -1.443308000 | -2.717054000 |              |
| 6  | -5.089900000 | -1.280805000 | 2.299895000  | 6                            | -5.095032000 | -0.582098000 | -2.200141000 |              |
| 6  | -5.444516000 | -1.944867000 | 1.054578000  | 6                            | -3.805284000 | 1.378286000  | -2.966940000 |              |
| 6  | -6.014209000 | -1.212643000 | 0.010923000  | 6                            | -1.694418000 | 2.350756000  | -2.604349000 |              |
| 6  | -4.306171000 | 2.384195000  | -2.102453000 | 6                            | -0.791323000 | 2.755300000  | -1.614871000 |              |
| 6  | -5.562509000 | -0.172002000 | -2.048656000 | 6                            | 0.351641000  | 1.930335000  | -1.277268000 |              |
| 6  | -3.080007000 | 2.866223000  | 2.215868000  | 6                            | 0.551386000  | 0.728697000  | -1.938856000 |              |
| 6  | 2.117248000  | -0.520788000 | -1.009086000 | 6                            | 1.146072000  | -0.472941000 | -1.284432000 |              |
| 6  | 3.061875000  | -1.652087000 | -0.664107000 | 6                            | 0.298951000  | -1.620176000 | -1.734077000 |              |
| 7  | 4.327370000  | -1.447116000 | -1.111093000 | 6                            | -0.163471000 | -2.604934000 | -0.875393000 |              |
| 8  | 2.685036000  | -2.649648000 | -0.050617000 | 6                            | -1.467681000 | -3.196953000 | -1.088524000 |              |
| 6  | 5.445863000  | -2.364291000 | -0.861500000 | 6                            | -4.276765000 | -2.867680000 | -0.709165000 |              |
| 1  | 6.308336000  | -1.900997000 | -1.357999000 | 6                            | -3.439138000 | -3.311615000 | 0.393905000  |              |
| 6  | 5.769561000  | -2.511307000 | 0.650101000  | 6                            | -2.065799000 | -3.466906000 | 0.207066000  |              |
| 1  | 4.859947000  | -2.906743000 | 1.113401000  | 6                            | -1.133150000 | -3.030430000 | 1.231339000  |              |
| 7  | 6.004643000  | -1.193899000 | 1.283621000  | 6                            | 0.046305000  | -2.500326000 | 0.579084000  |              |
| 1  | 2.565366000  | 0.293697000  | -1.573988000 | 6                            | 0.711387000  | -1.414265000 | 1.126674000  |              |
| 6  | 7.317472000  | -0.607913000 | 1.031385000  | 6                            | 1.373445000  | -0.358518000 | 0.300725000  |              |
| 1  | 8.145700000  | -1.114806000 | 1.557834000  | 6                            | 0.964504000  | 0.934584000  | 0.921879000  |              |
| 1  | 7.542895000  | -0.616056000 | -0.039605000 | 6                            | 0.562037000  | 2.035512000  | 0.181065000  |              |
| 1  | 7.317458000  | 0.438535000  | 1.358640000  | 6                            | -3.122167000 | 2.535372000  | -2.410222000 |              |
| 6  | 5.696557000  | -1.190162000 | 2.710234000  | 6                            | -2.465316000 | 2.863171000  | 2.148633000  |              |
| 1  | 5.751065000  | -0.163240000 | 3.091328000  | 6                            | -3.260912000 | 3.292166000  | 1.085399000  |              |
| 1  | 4.677535000  | -1.556471000 | 2.868955000  | 6                            | -4.562026000 | 2.690008000  | 0.861337000  |              |
| 1  | 6.385174000  | -1.805172000 | 3.319574000  | 6                            | -5.017637000 | 1.676201000  | 1.706568000  |              |
| 1  | 4.555225000  | -0.524268000 | -1.470712000 | 6                            | -4.190688000 | 1.226676000  | 2.812717000  |              |
| 8  | 7.070762000  | 4.257993000  | 2.229628000  | 6                            | -1.805019000 | 0.975639000  | 3.383136000  |              |
| 6  | 5.119987000  | 2.217367000  | -0.992850000 | 6                            | -0.633762000 | 1.517088000  | 2.714469000  |              |
| 8  | 4.973651000  | 1.401848000  | -1.890315000 | 6                            | -1.037110000 | 2.678567000  | 1.957361000  |              |
| 16 | 5.981558000  | 3.761153000  | -1.263457000 | 6                            | -0.456709000 | 2.922539000  | 0.707441000  |              |
| 6  | 6.410152000  | 3.570552000  | -3.028005000 | 6                            | -1.288433000 | 3.369504000  | -0.396239000 |              |
| 1  | 7.037253000  | 2.689064000  | -3.170998000 | 6                            | -2.659128000 | 3.555518000  | -0.211987000 |              |
| 1  | 5.502681000  | 3.474906000  | -3.626385000 | 6                            | -4.769185000 | 2.586923000  | -0.575103000 |              |
| 1  | 6.956545000  | 4.470735000  | -3.317076000 | 6                            | -5.423342000 | 1.474063000  | -1.107542000 |              |
| 6  | 7.999149000  | 3.659335000  | 1.844804000  | 6                            | -5.892792000 | 0.417206000  | -0.226995000 |              |

|                    |              |              |              |   |              |              |              |
|--------------------|--------------|--------------|--------------|---|--------------|--------------|--------------|
| 6                  | -5.694292000 | 0.516225000  | 1.150600000  | 6 | 2.096689000  | 0.300079000  | 3.564571000  |
| 6                  | -5.282272000 | -0.651198000 | 1.912284000  | 6 | 3.241681000  | 0.985905000  | 3.153872000  |
| 6                  | -4.353928000 | -0.212761000 | 2.939554000  | 6 | 1.852357000  | 2.756321000  | 2.139561000  |
| 6                  | -3.260717000 | -1.012651000 | 3.278759000  | 6 | 0.224455000  | 2.974414000  | 0.455589000  |
| 6                  | -1.960426000 | -0.404846000 | 3.501669000  | 6 | -0.073806000 | 2.654699000  | -0.873891000 |
| 6                  | 0.329753000  | 0.653977000  | 2.184973000  | 6 | -0.959712000 | 1.552052000  | -1.185260000 |
| 6                  | 0.170919000  | -0.783266000 | 2.308463000  | 6 | -1.518343000 | 0.807992000  | -0.159536000 |
| 6                  | -0.951601000 | -1.302123000 | 2.961485000  | 6 | -1.783547000 | -0.656386000 | -0.274677000 |
| 6                  | -1.619786000 | -2.455937000 | 2.410111000  | 6 | -1.325069000 | -1.240856000 | 1.023053000  |
| 6                  | -3.049545000 | -2.282219000 | 2.602353000  | 6 | -0.565398000 | -2.397617000 | 1.103357000  |
| 6                  | -3.941655000 | -2.700500000 | 1.614353000  | 6 | 0.444338000  | -2.530479000 | 2.133460000  |
| 6                  | -5.079528000 | -1.871100000 | 1.263766000  | 6 | 3.107933000  | -1.847689000 | 2.893641000  |
| 6                  | -5.286802000 | -1.974533000 | -0.172806000 | 6 | 2.873756000  | -2.930930000 | 1.951670000  |
| 6                  | -5.688217000 | -0.853556000 | -0.902487000 | 6 | 1.570947000  | -3.259338000 | 1.577809000  |
| 6                  | -3.595953000 | 3.125617000  | -1.237768000 | 6 | 1.264082000  | -3.573414000 | 0.193249000  |
| 6                  | -4.931731000 | 0.857425000  | -2.327201000 | 6 | -0.051364000 | -3.051840000 | -0.112754000 |
| 6                  | -2.940852000 | 1.809403000  | 3.031071000  | 6 | -0.315935000 | -2.529270000 | -1.368824000 |
| 6                  | 2.524375000  | -0.496427000 | -0.670117000 | 6 | -1.231635000 | -1.367001000 | -1.592096000 |
| 6                  | 3.373075000  | -1.747336000 | -0.689716000 | 6 | -0.508591000 | -0.480557000 | -2.552993000 |
| 7                  | 4.698937000  | -1.499563000 | -0.852465000 | 6 | -0.444604000 | 0.895604000  | -2.403002000 |
| 8                  | 2.903055000  | -2.874766000 | -0.559996000 | 6 | 1.581166000  | 3.332719000  | 0.832349000  |
| 6                  | 5.680159000  | -2.572805000 | -0.903388000 | 6 | 3.192302000  | 1.282468000  | -2.978452000 |
| 1                  | 5.233650000  | -3.417781000 | -1.438286000 | 6 | 3.408145000  | 2.324368000  | -2.075588000 |
| 1                  | 6.529401000  | -2.201125000 | -1.481988000 | 6 | 4.410420000  | 2.189038000  | -1.035052000 |
| 6                  | 6.163005000  | -3.078497000 | 0.464556000  | 6 | 5.157409000  | 1.013699000  | -0.932583000 |
| 1                  | 6.880257000  | -3.883781000 | 0.266064000  | 6 | 4.933134000  | -0.072904000 | -1.869755000 |
| 1                  | 5.318465000  | -3.532320000 | 1.005536000  | 6 | 3.095670000  | -1.055921000 | -3.188251000 |
| 7                  | 6.830879000  | -2.051483000 | 1.292729000  | 6 | 1.779159000  | -0.516274000 | -3.484834000 |
| 1                  | 3.074335000  | 0.431286000  | -0.808608000 | 6 | 1.837338000  | 0.920872000  | -3.357898000 |
| 6                  | 7.986075000  | -2.597191000 | 2.006196000  | 6 | 0.747463000  | 1.609701000  | -2.814716000 |
| 1                  | 7.717900000  | -3.401720000 | 2.716080000  | 6 | 0.976414000  | 2.694309000  | -1.876290000 |
| 1                  | 8.711108000  | -2.998950000 | 1.291020000  | 6 | 2.277188000  | 3.048552000  | -1.517507000 |
| 1                  | 8.476195000  | -1.798742000 | 2.574588000  | 6 | 3.902854000  | 2.835288000  | 0.165678000  |
| 6                  | 5.902449000  | -1.428367000 | 2.240031000  | 6 | 4.163118000  | 2.279857000  | 1.420087000  |
| 1                  | 6.415438000  | -0.627507000 | 2.785244000  | 6 | 4.935832000  | 1.053382000  | 1.524828000  |
| 1                  | 5.058674000  | -0.992914000 | 1.702096000  | 6 | 5.422935000  | 0.433692000  | 0.373391000  |
| 1                  | 5.507943000  | -2.147865000 | 2.981246000  | 6 | 5.359487000  | -1.012660000 | 0.243009000  |
| 1                  | 5.027692000  | -0.544273000 | -0.954594000 | 6 | 5.057754000  | -1.326078000 | -1.142711000 |
| 6                  | 7.710228000  | 0.929702000  | -0.085531000 | 6 | 4.215680000  | -2.397402000 | -1.447935000 |
| 6                  | 6.435804000  | 1.748517000  | 0.086818000  | 6 | 3.213677000  | -2.256917000 | -2.490207000 |
| 8                  | 5.351639000  | 1.396221000  | -0.337471000 | 6 | 0.633426000  | -1.196515000 | -3.062119000 |
| 16                 | 6.667114000  | 3.269634000  | 0.987117000  | 6 | 0.753792000  | -2.447221000 | -2.335462000 |
| 6                  | 4.947465000  | 3.886434000  | 0.986070000  | 6 | 2.021536000  | -2.969833000 | -2.060217000 |
| 1                  | 4.639130000  | 4.144310000  | -0.028483000 | 6 | 2.282861000  | -3.548603000 | -0.764467000 |
| 1                  | 4.276345000  | 3.127153000  | 1.390787000  | 6 | 3.639037000  | -3.196897000 | -0.379395000 |
| 1                  | 4.934411000  | 4.776170000  | 1.618817000  | 6 | 3.929054000  | -2.893024000 | 0.951341000  |
| 6                  | 8.000222000  | 0.682672000  | -1.554565000 | 6 | 4.806631000  | -1.782037000 | 1.268844000  |
| 8                  | 9.215010000  | 1.154773000  | -1.910371000 | 6 | 4.299132000  | -1.135857000 | 2.469900000  |
| 8                  | 7.254703000  | 0.122733000  | -2.326945000 | 6 | 4.364758000  | 0.253389000  | 2.595768000  |
| 1                  | 9.326894000  | 0.942386000  | -2.857180000 | 6 | 2.587530000  | 3.369954000  | -0.133675000 |
| 1                  | 8.563470000  | 1.406165000  | 0.400196000  | 6 | 3.116930000  | 2.239060000  | 2.426731000  |
| 1                  | 7.520576000  | -0.060897000 | 0.370724000  | 6 | 3.971486000  | 0.059140000  | -2.873401000 |
|                    |              |              |              | 6 | -2.713798000 | -1.260848000 | -1.308300000 |
|                    |              |              |              | 6 | -3.538007000 | -2.471933000 | -0.972289000 |
| AF <sub>INT1</sub> |              |              |              | 7 | -4.836801000 | -2.397869000 | -1.410077000 |
| 6                  | -0.093377000 | -0.277039000 | 2.943370000  | 8 | -3.098731000 | -3.434103000 | -0.347915000 |
| 6                  | 0.781855000  | 0.838946000  | 3.263020000  | 6 | -5.800918000 | -3.407490000 | -1.007121000 |
| 6                  | 0.662554000  | 2.040792000  | 2.566290000  | 1 | -6.191112000 | -3.947399000 | -1.880138000 |
| 6                  | -0.337437000 | 2.178170000  | 1.521229000  | 1 | -5.257397000 | -4.133302000 | -0.398394000 |
| 6                  | -1.172417000 | 1.102455000  | 1.207436000  | 6 | -7.018113000 | -2.835943000 | -0.261391000 |
| 6                  | -1.048087000 | -0.150342000 | 1.929422000  | 1 | -7.583909000 | -3.651092000 | 0.204666000  |
| 6                  | 0.671431000  | -1.496923000 | 3.047794000  | 1 | -7.681791000 | -2.317372000 | -0.960121000 |
| 6                  | 2.028138000  | -1.146044000 | 3.431574000  |   |              |              |              |

|    |              |              |              |   |              |              |              |
|----|--------------|--------------|--------------|---|--------------|--------------|--------------|
| 7  | -6.672646000 | -1.818993000 | 0.781878000  | 6 | -0.874622000 | -1.341699000 | -2.304928000 |
| 1  | -3.221888000 | -0.510551000 | -1.909642000 | 6 | -1.013028000 | -2.506145000 | -1.462240000 |
| 6  | -5.703327000 | -2.282401000 | 1.814000000  | 6 | -0.566755000 | -2.454087000 | -0.137056000 |
| 1  | -4.817633000 | -2.706302000 | 1.341224000  | 6 | -1.371499000 | -3.047696000 | 0.916073000  |
| 1  | -5.412217000 | -1.412221000 | 2.403866000  | 6 | -2.583736000 | -3.667241000 | 0.609640000  |
| 1  | -6.178984000 | -3.034737000 | 2.450882000  | 6 | -4.916016000 | -3.379026000 | 0.625669000  |
| 6  | -7.894902000 | -1.252039000 | 1.416067000  | 6 | -5.941073000 | -2.487121000 | 0.947963000  |
| 1  | -7.587353000 | -0.425366000 | 2.058068000  | 6 | -6.578130000 | -1.704179000 | -0.097920000 |
| 1  | -8.551304000 | -0.868811000 | 0.632761000  | 6 | -6.169328000 | -1.847003000 | -1.424413000 |
| 1  | -8.409579000 | -2.021690000 | 1.998282000  | 6 | -6.023829000 | -0.674640000 | -2.271304000 |
| 1  | -5.186670000 | -1.480923000 | -1.685506000 | 6 | -4.873759000 | -0.883008000 | -3.133416000 |
| 6  | -4.954190000 | 2.245431000  | -0.808582000 | 6 | -4.033841000 | 0.187893000  | -3.446238000 |
| 6  | -4.342976000 | 3.280039000  | -0.059283000 | 6 | -2.593514000 | 0.000344000  | -3.454574000 |
| 8  | -4.175787000 | 3.268789000  | 1.182370000  | 6 | -0.296973000 | -0.181554000 | -1.781930000 |
| 16 | -3.784645000 | 4.701283000  | -1.044694000 | 6 | -0.860781000 | 1.118816000  | -2.092765000 |
| 6  | -2.957289000 | 5.692147000  | 0.246379000  | 6 | -1.984822000 | 1.207789000  | -2.919730000 |
| 1  | -3.301986000 | 5.320854000  | 1.214308000  | 6 | -3.037896000 | 2.136189000  | -2.584917000 |
| 1  | -1.872232000 | 5.583855000  | 0.176250000  | 6 | -4.308774000 | 1.510187000  | -2.907700000 |
| 1  | -3.236654000 | 6.740133000  | 0.119060000  | 6 | -5.413630000 | 1.707625000  | -2.078399000 |
| 1  | -6.253041000 | -0.955956000 | 0.201282000  | 6 | -6.288479000 | 0.595821000  | -1.755675000 |
| 6  | -5.439805000 | 1.100432000  | -0.167115000 | 6 | -6.714488000 | 0.744779000  | -0.372263000 |
| 8  | -5.340857000 | 0.988004000  | 1.178106000  | 6 | -6.858907000 | -0.382768000 | 0.438808000  |
| 8  | -5.984777000 | 0.105602000  | -0.761254000 | 6 | -3.739325000 | -3.469335000 | 1.470079000  |
| 1  | -4.882202000 | 1.830077000  | 1.494157000  | 6 | -5.830926000 | -1.651402000 | 2.130723000  |
| 1  | -5.057697000 | 2.319138000  | -1.883218000 | 6 | -2.921764000 | -2.363305000 | -2.829499000 |

AF<sub>INT2</sub>

|   |              |              |              |    |              |              |              |
|---|--------------|--------------|--------------|----|--------------|--------------|--------------|
| 6 | -3.760380000 | 1.828817000  | 2.844205000  | 6  | 1.031328000  | 1.822314000  | 1.128842000  |
| 6 | -4.634647000 | 0.714166000  | 3.172288000  | 6  | 1.458414000  | 3.265724000  | 1.079188000  |
| 6 | -4.092360000 | -0.533885000 | 3.475846000  | 7  | 2.781459000  | 3.447057000  | 1.363507000  |
| 6 | -2.651132000 | -0.720241000 | 3.461691000  | 8  | 0.693676000  | 4.190875000  | 0.815112000  |
| 6 | -1.811798000 | 0.348555000  | 3.135093000  | 6  | 3.374086000  | 4.754183000  | 1.167469000  |
| 6 | -2.373768000 | 1.648826000  | 2.819673000  | 1  | 2.686339000  | 5.511227000  | 1.554828000  |
| 6 | -4.390836000 | 2.609367000  | 1.807431000  | 1  | 4.297712000  | 4.812960000  | 1.750061000  |
| 6 | -5.660934000 | 1.982984000  | 1.482136000  | 6  | 3.614687000  | 5.095233000  | -0.310016000 |
| 6 | -5.812406000 | 0.809794000  | 2.327527000  | 1  | 4.058995000  | 6.093182000  | -0.410680000 |
| 6 | -6.398266000 | -0.349950000 | 1.815803000  | 1  | 2.652566000  | 5.084953000  | -0.827711000 |
| 6 | -4.700428000 | -1.741281000 | 2.945187000  | 7  | 4.506397000  | 4.120726000  | -1.024917000 |
| 6 | -2.366366000 | -2.032331000 | 2.930732000  | 1  | 1.815245000  | 1.133367000  | 1.433614000  |
| 6 | -1.255621000 | -2.212928000 | 2.098951000  | 6  | 5.893571000  | 4.074415000  | -0.474973000 |
| 6 | -0.376892000 | -1.102566000 | 1.789537000  | 1  | 6.352635000  | 5.063361000  | -0.571430000 |
| 6 | -0.638671000 | 0.150139000  | 2.322247000  | 1  | 5.853752000  | 3.764988000  | 0.567368000  |
| 6 | -0.347591000 | 1.420138000  | 1.595013000  | 1  | 6.469582000  | 3.327200000  | -1.024075000 |
| 6 | -1.552765000 | 2.278067000  | 1.811672000  | 6  | 4.527097000  | 4.390005000  | -2.489326000 |
| 6 | -2.164911000 | 2.996538000  | 0.796556000  | 1  | 5.121827000  | 3.613660000  | -2.972969000 |
| 6 | -3.602654000 | 3.167854000  | 0.795853000  | 1  | 3.504776000  | 4.351670000  | -2.869651000 |
| 6 | -6.102861000 | 1.948605000  | 0.158984000  | 1  | 4.962719000  | 5.374417000  | -2.682972000 |
| 6 | -5.291885000 | 2.541340000  | -0.892904000 | 1  | 3.412855000  | 2.636134000  | 1.294075000  |
| 6 | -4.067947000 | 3.132295000  | -0.579596000 | 6  | 7.128269000  | -0.276051000 | 0.053322000  |
| 6 | -2.914692000 | 2.927572000  | -1.438303000 | 1  | 6.891283000  | 0.633558000  | 0.610619000  |
| 6 | -1.733014000 | 2.845756000  | -0.604101000 | 6  | 8.141858000  | -1.096290000 | 0.848117000  |
| 6 | -0.704666000 | 1.979894000  | -0.943247000 | 8  | 8.991555000  | -1.816716000 | 0.380691000  |
| 6 | 0.120579000  | 1.253525000  | 0.068674000  | 16 | 7.928485000  | -0.898887000 | 2.635182000  |
| 6 | 0.209926000  | -0.147139000 | -0.433804000 | 6  | 9.185692000  | -2.101553000 | 3.189631000  |
| 6 | 0.056096000  | -1.254151000 | 0.385503000  | 1  | 8.953148000  | -3.094717000 | 2.801438000  |
| 6 | -3.631909000 | -2.668403000 | 2.607742000  | 1  | 10.175035000 | -1.799694000 | 2.842025000  |
| 6 | -2.279811000 | -3.141288000 | -1.781720000 | 1  | 9.156173000  | -2.107435000 | 4.281383000  |
| 6 | -3.050317000 | -3.710583000 | -0.766913000 | 1  | 4.069387000  | 3.094875000  | -0.946809000 |
| 6 | -4.489915000 | -3.527922000 | -0.757541000 | 6  | 7.656070000  | 0.206735000  | -1.285468000 |
| 6 | -5.106295000 | -2.778958000 | -1.762030000 | 8  | 8.116743000  | -0.766558000 | -2.090015000 |
| 6 | -4.306439000 | -2.184486000 | -2.818619000 | 8  | 7.647336000  | 1.374850000  | -1.630658000 |
| 6 | -2.049969000 | -1.248178000 | -3.154703000 | 1  | 8.423354000  | -0.321598000 | -2.903616000 |
|   |              |              |              | 6  | 5.714064000  | -1.024213000 | -0.049676000 |
|   |              |              |              | 6  | 4.771937000  | -0.185933000 | -0.859291000 |

|   |             |              |              |
|---|-------------|--------------|--------------|
| 1 | 5.361448000 | -1.006732000 | 0.987612000  |
| 1 | 4.432838000 | -0.446414000 | -1.850697000 |
| 7 | 4.341804000 | 0.962594000  | -0.395986000 |
| 8 | 4.683389000 | 1.402210000  | 0.778957000  |
| 8 | 3.547019000 | 1.718050000  | -1.131011000 |
| 6 | 5.764643000 | -2.474601000 | -0.503368000 |
| 6 | 5.709019000 | -3.487553000 | 0.464381000  |
| 6 | 5.832730000 | -2.849785000 | -1.852386000 |
| 6 | 5.730564000 | -4.834229000 | 0.100356000  |
| 1 | 5.641128000 | -3.216155000 | 1.515152000  |
| 6 | 5.850514000 | -4.194836000 | -2.220089000 |
| 1 | 5.883217000 | -2.090159000 | -2.625403000 |
| 6 | 5.800927000 | -5.192792000 | -1.245682000 |
| 1 | 5.683444000 | -5.601080000 | 0.869045000  |
| 1 | 5.902404000 | -4.462986000 | -3.272072000 |
| 1 | 5.812829000 | -6.240410000 | -1.534195000 |

|    |               |              |              |
|----|---------------|--------------|--------------|
| 6  | 6.652967000   | -0.254150000 | 1.803965000  |
| 6  | 5.695689000   | -0.344213000 | 2.892503000  |
| 6  | 4.877010000   | 0.746447000  | 3.192896000  |
| 6  | 3.474459000   | 0.534659000  | 3.505768000  |
| 6  | 0.917852000   | 0.043323000  | 2.353246000  |
| 6  | 1.464470000   | 1.387938000  | 2.347388000  |
| 6  | 2.717694000   | 1.629177000  | 2.919395000  |
| 6  | 3.642567000   | 2.512058000  | 2.250593000  |
| 6  | 4.980808000   | 1.970545000  | 2.415396000  |
| 6  | 5.900214000   | 2.054265000  | 1.369054000  |
| 6  | 6.753254000   | 0.922306000  | 1.058466000  |
| 6  | 6.905685000   | 0.856308000  | -0.387209000 |
| 6  | 6.951704000   | -0.387938000 | -1.028259000 |
| 6  | 3.851551000   | -3.654982000 | -0.955467000 |
| 6  | 5.690154000   | -1.925960000 | -2.276385000 |
| 6  | 3.797003000   | -1.891719000 | 3.199905000  |
| 6  | -1.031622000  | 1.530116000  | -0.523057000 |
| 6  | -1.501589000  | 2.957930000  | -0.640824000 |
| 7  | -2.848779000  | 3.072428000  | -0.851532000 |
| 8  | -0.750998000  | 3.924768000  | -0.571158000 |
| 6  | -3.496211000  | 4.373730000  | -0.898153000 |
| 1  | -2.742482000  | 5.090420000  | -1.232952000 |
| 1  | -4.289729000  | 4.347224000  | -1.652951000 |
| 6  | -4.033481000  | 4.853822000  | 0.459726000  |
| 1  | -4.289189000  | 5.924227000  | 0.393137000  |
| 1  | -3.228023000  | 4.756011000  | 1.193399000  |
| 7  | -5.203525000  | 4.090239000  | 0.959519000  |
| 1  | -1.815493000  | 0.775972000  | -0.571009000 |
| 6  | -6.450387000  | 4.462200000  | 0.266741000  |
| 1  | -6.725506000  | 5.509105000  | 0.466083000  |
| 1  | -6.335927000  | 4.328986000  | -0.811953000 |
| 1  | -7.253731000  | 3.805514000  | 0.610699000  |
| 6  | -5.368267000  | 4.242580000  | 2.416583000  |
| 1  | -6.189644000  | 3.601268000  | 2.746971000  |
| 1  | -4.451085000  | 3.925535000  | 2.920774000  |
| 1  | -5.584879000  | 5.284500000  | 2.697059000  |
| 1  | -3.430457000  | 2.248309000  | -0.760648000 |
| 6  | -5.634591000  | -0.711342000 | 0.507848000  |
| 6  | -4.826303000  | -0.807822000 | -0.802732000 |
| 8  | -3.624727000  | -0.990259000 | -0.780247000 |
| 16 | -5.715378000  | -0.578487000 | -2.339421000 |
| 6  | -4.288898000  | -0.629956000 | -3.480759000 |
| 1  | -3.629774000  | 0.224817000  | -3.316004000 |
| 1  | -3.726992000  | -1.553877000 | -3.337506000 |
| 1  | -4.701676000  | -0.593061000 | -4.491236000 |
| 6  | -5.909303000  | 0.761464000  | 0.856814000  |
| 8  | -4.943942000  | 1.552633000  | 0.416684000  |
| 8  | -6.852678000  | 1.145528000  | 1.530047000  |
| 1  | -5.081840000  | 2.567548000  | 0.703116000  |
| 1  | -4.883999000  | -1.012566000 | 1.252504000  |
| 6  | -6.820242000  | -1.713250000 | 0.657541000  |
| 1  | -6.367627000  | -2.696635000 | 0.493262000  |
| 6  | -7.298690000  | -1.729941000 | 2.121523000  |
| 6  | -7.999279000  | -1.602102000 | -0.307075000 |
| 6  | -8.821497000  | -0.466436000 | -0.380236000 |
| 6  | -8.317529000  | -2.709500000 | -1.106818000 |
| 6  | -9.913453000  | -0.437469000 | -1.248614000 |
| 1  | -8.611146000  | 0.393762000  | 0.245218000  |
| 6  | -9.411862000  | -2.682072000 | -1.970559000 |
| 1  | -7.703271000  | -3.604012000 | -1.047757000 |
| 6  | -10.212002000 | -1.541939000 | -2.04768000  |
| 1  | -10.537486000 | 0.451311000  | -1.293566000 |

AF<sub>INT3</sub>

|   |             |              |              |
|---|-------------|--------------|--------------|
| 6 | 3.352934000 | 1.354324000  | -3.103227000 |
| 6 | 4.204776000 | 0.218780000  | -3.418312000 |
| 6 | 3.678002000 | -1.072026000 | -3.417415000 |
| 6 | 2.275740000 | -1.281834000 | -3.098348000 |
| 6 | 1.460035000 | -0.191091000 | -2.784126000 |
| 6 | 2.006000000 | 1.153653000  | -2.785487000 |
| 6 | 4.126614000 | 2.302929000  | -2.339091000 |
| 6 | 5.464530000 | 1.761339000  | -2.172075000 |
| 6 | 5.513357000 | 0.471259000  | -2.840715000 |
| 6 | 6.241126000 | -0.580105000 | -2.279548000 |
| 6 | 4.433585000 | -2.167171000 | -2.835227000 |
| 6 | 2.160616000 | -2.497504000 | -2.327884000 |
| 6 | 1.234669000 | -2.565029000 | -1.280870000 |
| 6 | 0.375653000 | -1.436808000 | -0.982181000 |
| 6 | 0.471249000 | -0.280718000 | -1.740079000 |
| 6 | 0.260962000 | 1.082885000  | -1.170663000 |
| 6 | 1.358421000 | 1.919968000  | -1.746402000 |
| 6 | 2.112479000 | 2.803947000  | -0.990655000 |
| 6 | 3.514996000 | 3.001381000  | -1.293115000 |
| 6 | 6.146727000 | 1.947533000  | -0.969129000 |
| 6 | 5.518262000 | 2.685271000  | 0.115421000  |
| 6 | 4.229926000 | 3.195014000  | -0.043799000 |
| 6 | 3.268818000 | 3.107508000  | 1.041559000  |
| 6 | 1.958340000 | 2.870412000  | 0.473021000  |
| 6 | 1.054545000 | 2.051745000  | 1.131830000  |
| 6 | 0.092353000 | 1.156262000  | 0.417830000  |
| 6 | 0.167006000 | -0.149084000 | 1.138667000  |
| 6 | 0.220947000 | -1.369631000 | 0.484645000  |
| 6 | 3.494226000 | -3.048886000 | -2.160580000 |
| 6 | 3.010310000 | -2.839681000 | 2.426979000  |
| 6 | 3.604965000 | -3.548386000 | 1.382274000  |
| 6 | 5.006588000 | -3.341928000 | 1.068630000  |
| 6 | 5.761651000 | -2.430038000 | 1.808996000  |
| 6 | 5.144694000 | -1.690006000 | 2.895793000  |
| 6 | 2.947154000 | -0.755891000 | 3.510974000  |
| 6 | 1.640107000 | -1.006858000 | 2.927160000  |
| 6 | 1.676456000 | -2.288035000 | 2.262440000  |
| 6 | 0.988364000 | -2.458090000 | 1.055933000  |
| 6 | 1.610513000 | -3.197445000 | -0.028484000 |
| 6 | 2.888069000 | -3.735079000 | 0.130845000  |
| 6 | 5.159082000 | -3.407976000 | -0.376808000 |
| 6 | 6.060257000 | -2.559294000 | -1.022856000 |
| 6 | 6.841809000 | -1.607036000 | -0.251502000 |
| 6 | 6.695577000 | -1.543763000 | 1.134685000  |



|   |               |              |              |
|---|---------------|--------------|--------------|
| 1 | -9.638611000  | -3.552648000 | -2.579940000 |
| 1 | -11.065954000 | -1.516738000 | -2.719292000 |
| 1 | -7.950149000  | -0.899711000 | 2.376682000  |
| 7 | -8.080395000  | -2.991367000 | 2.424902000  |
| 8 | -7.642159000  | -4.053679000 | 1.989350000  |
| 8 | -9.080275000  | -2.868302000 | 3.122067000  |
| 1 | -6.454339000  | -1.758784000 | 2.818692000  |

AF<sub>INT4</sub>

|   |              |              |              |
|---|--------------|--------------|--------------|
| 6 | 4.018085000  | 2.884205000  | -1.587406000 |
| 6 | 4.921394000  | 1.890630000  | -2.145067000 |
| 6 | 4.441629000  | 0.926772000  | -3.030581000 |
| 6 | 3.034153000  | 0.913474000  | -3.391702000 |
| 6 | 2.163830000  | 1.861641000  | -2.846790000 |
| 6 | 2.661336000  | 2.867263000  | -1.926500000 |
| 6 | 4.401897000  | 3.127770000  | -0.218607000 |
| 6 | 5.545319000  | 2.284393000  | 0.084961000  |
| 6 | 5.868425000  | 1.519124000  | -1.108299000 |
| 6 | 6.293524000  | 0.193864000  | -0.995720000 |
| 6 | 4.882477000  | -0.452141000 | -2.915409000 |
| 6 | 2.605664000  | -0.460659000 | -3.505450000 |
| 6 | 1.326278000  | -0.821025000 | -3.068601000 |
| 6 | 0.422100000  | 0.176514000  | -2.531865000 |
| 6 | 0.827572000  | 1.499877000  | -2.445931000 |
| 6 | 0.395729000  | 2.420855000  | -1.353333000 |
| 6 | 1.638006000  | 3.148717000  | -0.947536000 |
| 6 | 2.008490000  | 3.343661000  | 0.373568000  |
| 6 | 3.407615000  | 3.336331000  | 0.742911000  |
| 6 | 5.661977000  | 1.692678000  | 1.343196000  |
| 6 | 4.637288000  | 1.920827000  | 2.349675000  |
| 6 | 3.534341000  | 2.720957000  | 2.052249000  |
| 6 | 2.207097000  | 2.332760000  | 2.495531000  |
| 6 | 1.254333000  | 2.715068000  | 1.472402000  |
| 6 | 0.158191000  | 1.906151000  | 1.213763000  |
| 6 | -0.419189000 | 1.724545000  | -0.150918000 |
| 6 | -0.648736000 | 0.259376000  | -0.283964000 |
| 6 | -0.328932000 | -0.455960000 | -1.428383000 |
| 6 | 3.745801000  | -1.310644000 | -3.208843000 |
| 6 | 1.386685000  | -3.286669000 | 0.234786000  |
| 6 | 2.363574000  | -3.501055000 | -0.739082000 |
| 6 | 3.767809000  | -3.493725000 | -0.374587000 |
| 6 | 4.144128000  | -3.264259000 | 0.950491000  |
| 6 | 3.130125000  | -3.037838000 | 1.965046000  |
| 6 | 0.877949000  | -2.058279000 | 2.173335000  |
| 6 | -0.067401000 | -1.683306000 | 1.132943000  |
| 6 | 0.245728000  | -2.438475000 | -0.060417000 |
| 6 | 0.126935000  | -1.828535000 | -1.314379000 |
| 6 | 1.143582000  | -2.055762000 | -2.325492000 |
| 6 | 2.236471000  | -2.877440000 | -2.046750000 |
| 6 | 4.511433000  | -2.871966000 | -1.459878000 |
| 6 | 5.600450000  | -2.045929000 | -1.175166000 |
| 6 | 5.988348000  | -1.804545000 | 0.204748000  |
| 6 | 5.276167000  | -2.401488000 | 1.245459000  |
| 6 | 4.958809000  | -1.638557000 | 2.441033000  |
| 6 | 3.633391000  | -2.031723000 | 2.886371000  |
| 6 | 2.765765000  | -1.077001000 | 3.420698000  |
| 6 | 1.361358000  | -1.089707000 | 3.051674000  |
| 6 | -0.478318000 | -0.350556000 | 1.011742000  |
| 6 | 0.020910000  | 0.657947000  | 1.928158000  |
| 6 | 0.920783000  | 0.291596000  | 2.932985000  |
| 6 | 2.040614000  | 1.152393000  | 3.227282000  |
| 6 | 3.186247000  | 0.310808000  | 3.528435000  |

|    |              |              |              |
|----|--------------|--------------|--------------|
| 6  | 4.458885000  | 0.686382000  | 3.097763000  |
| 6  | 5.362426000  | -0.306024000 | 2.545692000  |
| 6  | 6.105974000  | 0.316250000  | 1.460776000  |
| 6  | 6.415551000  | -0.419602000 | 0.315013000  |
| 6  | 3.566116000  | -2.495910000 | -2.494426000 |
| 6  | 5.790082000  | -0.812087000 | -1.917401000 |
| 6  | 1.778122000  | -3.050922000 | 1.615442000  |
| 6  | -1.039756000 | 2.760871000  | -1.057996000 |
| 6  | -1.443240000 | 4.111497000  | -0.503199000 |
| 7  | -2.763740000 | 4.384821000  | -0.664118000 |
| 8  | -0.641093000 | 4.866121000  | 0.038911000  |
| 6  | -3.383834000 | 5.566305000  | -0.083500000 |
| 1  | -2.663809000 | 6.018423000  | 0.603117000  |
| 1  | -3.591433000 | 6.307232000  | -0.867352000 |
| 6  | -4.665882000 | 5.183620000  | 0.661432000  |
| 1  | -5.108523000 | 6.091475000  | 1.116948000  |
| 1  | -4.394421000 | 4.508279000  | 1.479922000  |
| 7  | -5.615137000 | 4.477837000  | -0.201580000 |
| 1  | -1.744558000 | 2.333896000  | -1.767432000 |
| 6  | -6.309404000 | 5.371424000  | -1.121152000 |
| 1  | -6.948753000 | 6.111858000  | -0.600844000 |
| 1  | -5.592828000 | 5.919477000  | -1.740249000 |
| 1  | -6.945586000 | 4.783546000  | -1.791108000 |
| 6  | -6.562548000 | 3.676587000  | 0.565315000  |
| 1  | -7.203682000 | 3.111934000  | -0.120083000 |
| 1  | -6.022374000 | 2.958150000  | 1.188586000  |
| 1  | -7.218109000 | 4.284331000  | 1.219312000  |
| 1  | -3.399245000 | 3.659023000  | -0.984944000 |
| 6  | -4.761017000 | -2.807833000 | 0.412084000  |
| 6  | -3.935934000 | -3.689858000 | 1.005945000  |
| 8  | -2.842123000 | -3.400222000 | 1.769095000  |
| 16 | -4.291786000 | -5.431260000 | 0.95901300   |
| 6  | -2.623979000 | -6.136546000 | 0.673048000  |
| 1  | -2.247323000 | -5.873964000 | -0.318673000 |
| 1  | -1.931026000 | -5.794080000 | 1.442144000  |
| 1  | -2.738663000 | -7.221261000 | 0.740830000  |
| 6  | -6.438906000 | -3.620793000 | -3.614816000 |
| 8  | -6.404421000 | -2.695840000 | -2.897311000 |
| 8  | -6.474361000 | -4.540222000 | -4.332099000 |
| 6  | -4.720914000 | -1.302881000 | 0.590932000  |
| 1  | -3.966313000 | -1.040171000 | 1.339639000  |
| 6  | -4.282784000 | -0.660511000 | -0.734479000 |
| 6  | -6.061934000 | -0.761082000 | 1.085148000  |
| 6  | -7.218360000 | -0.847141000 | 0.296933000  |
| 6  | -6.157754000 | -0.178853000 | 2.354518000  |
| 6  | -8.438076000 | -0.359586000 | 0.767747000  |
| 1  | -7.176036000 | -1.303172000 | -0.689259000 |
| 6  | -7.377525000 | 0.306355000  | 2.828927000  |
| 1  | -5.269083000 | -0.101899000 | 2.975770000  |
| 6  | -8.522269000 | 0.218999000  | 2.035615000  |
| 1  | -9.324410000 | -0.435742000 | 0.143387000  |
| 1  | -7.431091000 | 0.753124000  | 3.818114000  |
| 1  | -9.472805000 | 0.596463000  | 2.402504000  |
| 1  | -5.005617000 | -0.786675000 | -1.540165000 |
| 7  | -4.042615000 | 0.829205000  | -0.632500000 |
| 8  | -3.734363000 | 1.299211000  | 0.457268000  |
| 8  | -4.110274000 | 1.471756000  | -1.680766000 |
| 1  | -3.319578000 | -1.058535000 | -1.069100000 |
| 1  | -5.552369000 | -3.208071000 | -0.212103000 |
| 1  | -2.501935000 | -2.512646000 | 1.560541000  |

AF<sub>1p</sub>

|   |              |              |              |      |              |              |              |
|---|--------------|--------------|--------------|------|--------------|--------------|--------------|
| 6 | -4.919786000 | 2.096698000  | 0.906312000  | 7    | 1.102154000  | 4.872084000  | 1.202441000  |
| 6 | -5.717939000 | 0.895743000  | 1.090983000  | 8    | -0.809685000 | 5.435202000  | 2.323135000  |
| 6 | -5.394737000 | -0.008559000 | 2.101959000  | 6    | 1.433953000  | 6.196182000  | 0.701283000  |
| 6 | -4.258357000 | 0.250090000  | 2.970141000  | 1    | 0.535162000  | 6.816623000  | 0.744493000  |
| 6 | -3.486185000 | 1.399334000  | 2.785908000  | 1    | 2.186393000  | 6.669546000  | 1.346620000  |
| 6 | -3.821878000 | 2.341019000  | 1.734715000  | 6    | 1.942518000  | 6.069089000  | -0.741247000 |
| 6 | -4.810268000 | 2.357670000  | -0.509196000 | 1    | 2.287366000  | 7.057384000  | -1.100888000 |
| 6 | -5.538170000 | 1.316579000  | -1.213693000 | 1    | 1.100764000  | 5.766970000  | -1.374077000 |
| 6 | -6.100702000 | 0.411717000  | -0.223555000 | 7    | 2.974907000  | 5.036969000  | -0.856676000 |
| 6 | -6.142573000 | -0.961088000 | -0.474702000 | 1    | 0.314539000  | 2.874254000  | 3.237424000  |
| 6 | -5.437791000 | -1.436778000 | 1.843156000  | 6    | 4.269392000  | 5.470738000  | -0.336468000 |
| 6 | -3.602682000 | -1.005337000 | 3.250232000  | 1    | 4.689851000  | 6.325171000  | -0.901382000 |
| 6 | -2.206454000 | -1.049690000 | 3.331652000  | 1    | 4.180477000  | 5.770484000  | 0.712823000  |
| 6 | -1.416315000 | 0.155227000  | 3.166018000  | 1    | 4.977271000  | 4.638867000  | -0.394099000 |
| 6 | -2.051277000 | 1.364578000  | 2.926130000  | 6    | 3.106239000  | 4.526263000  | -2.220179000 |
| 6 | -1.471146000 | 2.436077000  | 2.068355000  | 1    | 3.805204000  | 3.686034000  | -2.224600000 |
| 6 | -2.599240000 | 2.902558000  | 1.212075000  | 1    | 2.135342000  | 4.160732000  | -2.570016000 |
| 6 | -2.482402000 | 3.124011000  | -0.151556000 | 1    | 3.466301000  | 5.292026000  | -2.933418000 |
| 6 | -3.606037000 | 2.847782000  | -1.025544000 | 1    | 1.667692000  | 4.124518000  | 0.813003000  |
| 6 | -5.043441000 | 0.810665000  | -2.416331000 | 6    | 5.107073000  | -2.354193000 | -0.741283000 |
| 6 | -3.798587000 | 1.326601000  | -2.961810000 | 6    | 4.219469000  | -2.216077000 | 1.956026000  |
| 6 | -3.095039000 | 2.318670000  | -2.277341000 | 8    | 3.745170000  | -1.168447000 | 2.349032000  |
| 6 | -1.647665000 | 2.255593000  | -2.183148000 | 16   | 3.947131000  | -3.769495000 | 2.814817000  |
| 6 | -1.253141000 | 2.750492000  | -0.878483000 | 6    | 2.942599000  | -3.161044000 | 4.213510000  |
| 6 | -0.180193000 | 2.169045000  | -0.218586000 | 1    | 3.494689000  | -2.404993000 | 4.774272000  |
| 6 | -0.110906000 | 2.023521000  | 1.265061000  | 1    | 2.008129000  | -2.735404000 | 3.843878000  |
| 6 | 0.373329000  | 0.633020000  | 1.495819000  | 1    | 2.737051000  | -4.024706000 | 4.849469000  |
| 6 | -0.184724000 | -0.216464000 | 2.439163000  | 6    | 9.605933000  | -0.641462000 | 1.901557000  |
| 6 | -4.328561000 | -2.053423000 | 2.554001000  | 8    | 8.585588000  | -0.997541000 | 1.449841000  |
| 6 | -0.481241000 | -3.214712000 | 0.280325000  | 8    | 10.622305000 | -0.288413000 | 2.352144000  |
| 6 | -1.673572000 | -3.705542000 | 0.813798000  | 1    | 4.963042000  | -3.348610000 | 0.289069000  |
| 6 | -2.805484000 | -3.969506000 | -0.055160000 | 6    | 4.850105000  | -1.279517000 | -0.363098000 |
| 6 | -2.705257000 | -3.726457000 | -1.426527000 | 1    | 3.768275000  | -1.189207000 | -0.493893000 |
| 6 | -1.466289000 | -3.213226000 | -1.984091000 | 6    | 5.360284000  | 0.084379000  | 0.120276000  |
| 6 | 0.419486000  | -1.764014000 | -1.334131000 | 6    | 5.462529000  | -1.692300000 | -1.695669000 |
| 6 | 0.800321000  | -1.276866000 | -0.017588000 | 6    | 6.843921000  | -1.892702000 | -1.835570000 |
| 6 | 0.248704000  | -2.168563000 | 0.975346000  | 6    | 4.640116000  | -1.888637000 | -2.811992000 |
| 6 | -0.245639000 | -1.641934000 | 2.175465000  | 6    | 7.386503000  | -2.281776000 | -3.060454000 |
| 6 | -1.487614000 | -2.156267000 | 2.726039000  | 1    | 7.505636000  | -1.746007000 | -0.984991000 |
| 6 | -2.183924000 | -3.169377000 | 2.065126000  | 6    | 5.181236000  | -2.278806000 | -4.037998000 |
| 6 | -4.017636000 | -3.603819000 | 0.661335000  | 1    | 3.568969000  | -1.727820000 | -2.720685000 |
| 6 | -5.079941000 | -3.009612000 | -0.022823000 | 6    | 6.556276000  | -2.476883000 | -4.165898000 |
| 6 | -4.972320000 | -2.752337000 | -1.449305000 | 1    | 8.459041000  | -2.432390000 | -3.151192000 |
| 6 | -3.809952000 | -3.103582000 | -2.136728000 | 1    | 4.526703000  | -2.424076000 | -4.893161000 |
| 6 | -3.252726000 | -2.202195000 | -3.131363000 | 1    | 6.979234000  | -2.779197000 | -5.120055000 |
| 6 | -1.804814000 | -2.270365000 | -3.038375000 | 1    | 6.443722000  | 0.128971000  | 0.228337000  |
| 6 | -1.039596000 | -1.116025000 | -3.215384000 | 7    | 5.002580000  | 1.206543000  | -0.821852000 |
| 6 | 0.093547000  | -0.858417000 | -2.344166000 | 8    | 3.925075000  | 1.148596000  | -1.406812000 |
| 6 | 0.829284000  | 0.096964000  | 0.236957000  | 8    | 5.802623000  | 2.135959000  | -0.905029000 |
| 6 | 0.489720000  | 1.037561000  | -0.813362000 | 1    | 4.884137000  | 0.348353000  | 1.068050000  |
| 6 | 0.134528000  | 0.570603000  | -2.080800000 | 1    | 6.150715000  | -2.320687000 | 1.066684000  |
| 6 | -0.960481000 | 1.194793000  | -2.783528000 |      |              |              |              |
| 6 | -1.691618000 | 0.155323000  | -3.487419000 | AF2R |              |              |              |
| 6 | -3.082628000 | 0.218790000  | -3.573959000 | 6    | -1.952393000 | -2.528232000 | -2.442087000 |
| 6 | -3.878029000 | -0.981926000 | -3.395259000 | 6    | -3.229386000 | -1.992175000 | -2.885199000 |
| 6 | -5.090334000 | -0.615920000 | -2.679109000 | 6    | -3.305775000 | -0.696372000 | -3.393660000 |
| 6 | -5.627609000 | -1.485172000 | -1.727562000 | 6    | -2.106428000 | 0.120247000  | -3.476531000 |
| 6 | -3.633868000 | -3.114648000 | 1.972607000  | 6    | -0.881396000 | -0.391215000 | -3.039358000 |
| 6 | -5.804032000 | -1.904087000 | 0.579578000  | 6    | -0.799013000 | -1.740217000 | -2.511227000 |
| 6 | -0.375452000 | -2.965145000 | -1.148594000 | 6    | -2.183820000 | -3.341916000 | -1.273616000 |
| 6 | -0.164253000 | 3.121464000  | 2.289956000  | 6    | -3.606702000 | -3.314960000 | -0.980779000 |
| 6 | -0.009215000 | 4.597786000  | 1.926727000  | 6    | -4.254660000 | -2.479926000 | -1.979146000 |

|   |              |              |              |         |              |              |              |             |
|---|--------------|--------------|--------------|---------|--------------|--------------|--------------|-------------|
| 6 | -5.314311000 | -1.647226000 | -1.613513000 | 1       | 7.872356000  | -1.397053000 | 2.560837000  |             |
| 6 | -4.407078000 | 0.171181000  | -3.014967000 | 1       | 7.850165000  | -0.440620000 | 1.059503000  |             |
| 6 | -2.460013000 | 1.483041000  | -3.156987000 | 1       | 7.207594000  | 0.244548000  | 2.560913000  |             |
| 6 | -1.570831000 | 2.269497000  | -2.416046000 | 6       | 5.173781000  | -1.443475000 | 2.826585000  |             |
| 6 | -0.290904000 | 1.736943000  | -1.993175000 | 1       | 5.156138000  | -0.565083000 | 3.482998000  |             |
| 6 | 0.056005000  | 0.435798000  | -2.322525000 | 1       | 4.142391000  | -1.684771000 | 2.552951000  |             |
| 6 | 0.878885000  | -0.439439000 | -1.436667000 | 1       | 5.584335000  | -2.287331000 | 3.413327000  |             |
| 6 | 0.195687000  | -1.769933000 | -1.464649000 | 1       | 4.752990000  | 0.193522000  | -1.221500000 |             |
| 6 | -0.047978000 | -2.523868000 | -0.327610000 | 6       | 5.860746000  | 2.325386000  | 0.715401000  |             |
| 6 | -1.251216000 | -3.322607000 | -0.231507000 | 6       | 4.817149000  | 2.903372000  | -0.237453000 |             |
| 6 | -4.045962000 | -3.283918000 | 0.343267000  | 8       | 4.422418000  | 2.304344000  | -1.220942000 |             |
| 6 | -3.078148000 | -3.279241000 | 1.429031000  | 16      | 4.253759000  | 4.530823000  | 0.204244000  |             |
| 6 | -1.712791000 | -3.293350000 | 1.145160000  | 6       | 3.064877000  | 4.507423000  | -1.150169000 |             |
| 6 | -0.797213000 | -2.462672000 | 1.907369000  | 1       | 3.548994000  | 4.653732000  | -2.112417000 |             |
| 6 | 0.237774000  | -1.984705000 | 1.013277000  | 1       | 2.200276000  | 4.169646000  | -1.043787000 |             |
| 6 | 0.755436000  | -0.708013000 | 1.172811000  | 1       | 2.753062000  | 5.870596000  | -1.067293000 |             |
| 6 | 1.184413000  | 0.150582000  | 0.026587000  | 6       | 7.200953000  | 2.233288000  | 0.003690000  |             |
| 6 | 0.614185000  | 1.497545000  | 0.315617000  | 8       | 8.101515000  | 3.095828000  | 0.522558000  |             |
| 6 | -0.005207000 | 2.279864000  | -0.648691000 | 8       | 7.447430000  | 1.492070000  | -0.921023000 |             |
| 6 | -3.883137000 | 1.520011000  | -2.868227000 | 1       | 8.923950000  | 2.980674000  | 0.008432000  |             |
| 6 | -2.992707000 | 3.212388000  | 1.334604000  | 1       | 5.950622000  | 2.925857000  | 1.622246000  |             |
| 6 | -3.914036000 | 3.210576000  | 0.286520000  | 1       | 5.552474000  | 1.299460000  | 0.966403000  |             |
| 6 | -5.113952000 | 2.399216000  | 0.374181000  | 6       | 5.736201000  | -2.766283000 | -1.893223000 |             |
| 6 | -5.345431000 | 1.614423000  | 1.505720000  | 1       | 4.785664000  | -3.303087000 | -1.801398000 |             |
| 6 | -4.387091000 | 1.613143000  | 2.597137000  | 1       | 5.747394000  | -2.297799000 | -2.885013000 |             |
| 6 | -1.960171000 | 1.859512000  | 2.955229000  | 6       | 7.034264000  | -3.251075000 | 0.712365000  |             |
| 6 | -0.936909000 | 2.342122000  | 2.043292000  | 1       | 8.000716000  | -2.748000000 | 0.572604000  |             |
| 6 | -1.568933000 | 3.176276000  | 1.048488000  | 1       | 7.048900000  | -3.680421000 | 1.722655000  |             |
| 6 | -1.117540000 | 3.132677000  | -0.275475000 | 6       | 6.917698000  | -4.362158000 | -0.339478000 |             |
| 6 | -2.079641000 | 3.130919000  | -1.363289000 | 1       | 5.996483000  | -4.938307000 | -0.173227000 |             |
| 6 | -3.447553000 | 3.174083000  | -1.090398000 | 1       | 7.753682000  | -5.065188000 | -0.232809000 |             |
| 6 | -5.394725000 | 1.866203000  | -0.950222000 | 6       | 6.895452000  | -3.758806000 | -1.748437000 |             |
| 6 | -5.895418000 | 0.570087000  | -1.088778000 | 1       | 7.852317000  | -3.250379000 | -1.940621000 |             |
| 6 | -6.131297000 | -0.247325000 | 0.089690000  | 1       | 6.803366000  | -4.547056000 | -2.506087000 |             |
| 6 | -5.862416000 | 0.263875000  | 1.359791000  |         |              |              |              |             |
| 6 | -5.220310000 | -0.572840000 | 2.359943000  |         |              |              |              |             |
| 6 | -4.309183000 | 0.260231000  | 3.124896000  | AF2INT1 | 6            | 0.459545000  | 0.104184000  | 3.010683000 |
| 6 | -3.082418000 | -0.255090000 | 3.548635000  | 6       | 1.550733000  | 1.040780000  | 3.224669000  |             |
| 6 | -1.884488000 | 0.561368000  | 3.458110000  | 6       | 1.638882000  | 2.197616000  | 2.451330000  |             |
| 6 | 0.116275000  | 1.503510000  | 1.667609000  | 6       | 0.639232000  | 2.467777000  | 1.432232000  |             |
| 6 | 0.198174000  | 0.152628000  | 2.191214000  | 6       | -0.404105000 | 1.562751000  | 1.219893000  |             |
| 6 | -0.782296000 | -0.306835000 | 3.075938000  | 6       | -0.496361000 | 0.356647000  | 2.021755000  |             |
| 6 | -1.291792000 | -1.649114000 | 2.931868000  | 6       | 0.973331000  | -1.234995000 | 3.173804000  |             |
| 6 | -2.715354000 | -1.623430000 | 3.222210000  | 6       | 2.388480000  | -1.138750000 | 3.488665000  |             |
| 6 | -3.591412000 | -2.421201000 | 2.485304000  | 6       | 2.746086000  | 0.270090000  | 3.519910000  |             |
| 6 | -4.867741000 | -1.887363000 | 2.047543000  | 6       | 3.983855000  | 0.687760000  | 3.026445000  |             |
| 6 | -5.148693000 | -2.420725000 | 0.723122000  | 6       | 2.925673000  | 2.634603000  | 1.938487000  |             |
| 6 | -5.770561000 | -1.617461000 | -0.235033000 | 6       | 1.297952000  | 3.069912000  | 0.296958000  |             |
| 6 | -4.368147000 | 2.348529000  | -1.855366000 | 6       | 0.882878000  | 2.735353000  | -0.997020000 |             |
| 6 | -5.391863000 | -0.294466000 | -2.141670000 | 6       | -0.215829000 | 1.814489000  | -1.203335000 |             |
| 6 | -3.235147000 | 2.397644000  | 2.514775000  | 6       | -0.863137000 | 1.260501000  | -0.111621000 |             |
| 6 | 2.278179000  | -0.097401000 | -0.989140000 | 6       | -1.416694000 | -0.125596000 | -0.117258000 |             |
| 6 | 3.311847000  | -1.177992000 | -0.754184000 | 6       | -1.023276000 | -0.709828000 | 1.201547000  |             |
| 7 | 4.589146000  | -0.777722000 | -0.976529000 | 6       | -0.503389000 | -1.987836000 | 1.336539000  |             |
| 8 | 2.988256000  | -2.308327000 | -0.387283000 | 6       | 0.506127000  | -2.256216000 | 2.340297000  |             |
| 6 | 5.764431000  | -1.651106000 | -0.823801000 | 6       | 3.283787000  | -2.072878000 | 2.965745000  |             |
| 1 | 6.625358000  | -1.000047000 | -1.012370000 | 6       | 2.798702000  | -3.142794000 | 2.108111000  |             |
| 6 | 5.883534000  | -2.224843000 | 0.614997000  | 6       | 1.441169000  | -3.227247000 | 1.799875000  |             |
| 1 | 4.949075000  | -2.760147000 | 0.799944000  | 6       | 1.016284000  | -3.557469000 | 0.450673000  |             |
| 7 | 5.943582000  | -1.136287000 | 1.624023000  | 6       | -0.183177000 | -2.803754000 | 0.152125000  |             |
| 1 | 2.659018000  | 0.819821000  | -1.429544000 | 6       | -0.396514000 | -2.316333000 | -1.127622000 |             |
| 6 | 7.285057000  | -0.674450000 | 1.966373000  | 6       | -1.075481000 | -1.011190000 | -1.401213000 |             |

|    |              |              |              |
|----|--------------|--------------|--------------|
| 6  | -0.235487000 | -0.346447000 | -2.442300000 |
| 6  | 0.104504000  | 0.995936000  | -2.389252000 |
| 6  | 2.714320000  | 3.173027000  | 0.604234000  |
| 6  | 3.716799000  | 0.614750000  | -3.106854000 |
| 6  | 4.174041000  | 1.645788000  | -2.285106000 |
| 6  | 5.176038000  | 1.376933000  | -1.270543000 |
| 6  | 5.681075000  | 0.084746000  | -1.111851000 |
| 6  | 5.205450000  | -0.990373000 | -1.964685000 |
| 6  | 3.152751000  | -1.665904000 | -3.152561000 |
| 6  | 1.956160000  | -0.893785000 | -3.442862000 |
| 6  | 2.301467000  | 0.507955000  | -3.416764000 |
| 6  | 1.393965000  | 1.431702000  | -2.887157000 |
| 6  | 1.874043000  | 2.503816000  | -2.033030000 |
| 6  | 3.233984000  | 2.613374000  | -1.741815000 |
| 6  | 4.860245000  | 2.183154000  | -0.101165000 |
| 6  | 5.062693000  | 1.664387000  | 1.179355000  |
| 6  | 5.582949000  | 0.317135000  | 1.342918000  |
| 6  | 5.885863000  | -0.456022000 | 0.221547000  |
| 6  | 5.533421000  | -1.865921000 | 0.192778000  |
| 6  | 5.113645000  | -2.196664000 | -1.157733000 |
| 6  | 4.064435000  | -3.095323000 | -1.361483000 |
| 6  | 3.063580000  | -2.821642000 | -2.378021000 |
| 6  | 0.719375000  | -1.305046000 | -2.937669000 |
| 6  | 0.623982000  | -2.508062000 | -2.131258000 |
| 6  | 1.775171000  | -3.255424000 | -1.862032000 |
| 6  | 1.975801000  | -3.794832000 | -0.538762000 |
| 6  | 3.390693000  | -3.697563000 | -0.222596000 |
| 6  | 3.794555000  | -3.376952000 | 1.074100000  |
| 6  | 4.886934000  | -2.445829000 | 1.286225000  |
| 6  | 4.571349000  | -1.639772000 | 2.455960000  |
| 6  | 4.914392000  | -0.286399000 | 2.483867000  |
| 6  | 3.663708000  | 2.950075000  | -0.393995000 |
| 6  | 4.075431000  | 1.894129000  | 2.219585000  |
| 6  | 4.244108000  | -0.730607000 | -2.943354000 |
| 6  | -2.492545000 | -3.594592000 | -1.076806000 |
| 6  | -3.523904000 | -1.595775000 | -0.633958000 |
| 7  | -4.803246000 | -1.276480000 | -1.007905000 |
| 8  | -3.250317000 | -2.599416000 | 0.020531000  |
| 6  | -5.929630000 | -2.065681000 | -0.526618000 |
| 1  | -5.509199000 | -2.768439000 | 0.200138000  |
| 6  | -7.013183000 | -1.200782000 | 0.160038000  |
| 1  | -7.472865000 | -0.557650000 | -0.601947000 |
| 7  | -6.412203000 | -0.198949000 | 1.129394000  |
| 1  | -2.870017000 | 0.205078000  | -1.709898000 |
| 6  | -5.515498000 | -0.753553000 | 2.184461000  |
| 1  | -4.763354000 | -1.404658000 | 1.740426000  |
| 1  | -5.017567000 | 0.092395000  | 2.660582000  |
| 1  | -6.104061000 | -1.309475000 | 2.918581000  |
| 6  | -7.423835000 | 0.720272000  | 1.728582000  |
| 1  | -6.879986000 | 1.561877000  | 2.160321000  |
| 1  | -8.079585000 | 1.087416000  | 0.937092000  |
| 1  | -8.005752000 | 0.206969000  | 2.496152000  |
| 1  | -4.977342000 | -0.326100000 | -1.336525000 |
| 6  | -3.966115000 | 3.311637000  | -0.849413000 |
| 6  | -3.128137000 | 4.247923000  | -0.198149000 |
| 8  | -2.911865000 | 4.288520000  | 1.035635000  |
| 16 | -2.338597000 | 5.457053000  | -1.303408000 |
| 6  | -1.277804000 | 6.346093000  | -0.112855000 |
| 1  | -1.652161000 | 6.122076000  | 0.888771000  |
| 1  | -0.240481000 | 6.013820000  | -0.199978000 |
| 1  | -1.344398000 | 7.417469000  | -0.313655000 |
| 1  | -5.841876000 | 0.478842000  | 0.475128000  |

|   |              |              |              |
|---|--------------|--------------|--------------|
| 6 | -4.646870000 | 2.334435000  | -0.111473000 |
| 8 | -4.511324000 | 2.298292000  | 1.236999000  |
| 8 | -5.406498000 | 1.436907000  | -0.610985000 |
| 1 | -3.879172000 | 3.049033000  | 1.473659000  |
| 1 | -4.099364000 | 3.332902000  | -1.923141000 |
| 6 | -6.588364000 | -2.897108000 | -1.645993000 |
| 1 | -6.985299000 | -2.220802000 | -2.416342000 |
| 1 | -5.810076000 | -3.501235000 | -2.123522000 |
| 6 | -8.098165000 | -2.097491000 | 0.772389000  |
| 1 | -8.868401000 | -1.492106000 | 1.262424000  |
| 1 | -7.654119000 | -2.743123000 | 1.542112000  |
| 6 | -8.749257000 | -2.967937000 | -0.318603000 |
| 1 | -9.496381000 | -3.625760000 | 0.140027000  |
| 1 | -9.293389000 | -2.316047000 | -1.016704000 |
| 6 | -7.707800000 | -3.789202000 | -1.090741000 |
| 1 | -7.269356000 | -4.543240000 | -0.421894000 |
| 1 | -8.190580000 | -4.339425000 | -1.906653000 |

AF2<sub>INT2</sub>

|   |              |              |              |
|---|--------------|--------------|--------------|
| 6 | -3.856765000 | 2.177560000  | 2.511245000  |
| 6 | -4.848862000 | 1.196684000  | 2.921320000  |
| 6 | -4.443844000 | -0.038066000 | 3.426382000  |
| 6 | -3.027864000 | -0.344923000 | 3.540414000  |
| 6 | -2.074644000 | 0.593817000  | 3.135674000  |
| 6 | -2.493717000 | 1.880106000  | 2.610243000  |
| 6 | -4.349230000 | 2.856080000  | 1.337085000  |
| 6 | -5.650304000 | 2.299364000  | 1.007911000  |
| 6 | -5.960302000 | 1.272273000  | 1.989153000  |
| 6 | -6.619928000 | 0.105971000  | 1.595865000  |
| 6 | -5.129015000 | -1.252212000 | 3.019328000  |
| 6 | -2.835373000 | -1.737234000 | 3.210864000  |
| 6 | -1.698790000 | -2.124149000 | 2.492035000  |
| 6 | -0.703889000 | -1.145390000 | 2.101100000  |
| 6 | -0.878261000 | 0.186845000  | 2.443102000  |
| 6 | -0.427328000 | 1.314917000  | 1.575850000  |
| 6 | -1.558998000 | 2.292155000  | 1.589156000  |
| 6 | -2.040952000 | 2.910420000  | 0.445848000  |
| 6 | -3.453673000 | 3.199908000  | 0.319088000  |
| 6 | -6.014189000 | 2.118650000  | -0.327068000 |
| 6 | -5.090399000 | 2.488926000  | -1.387767000 |
| 6 | -3.837630000 | 3.012821000  | -1.069166000 |
| 6 | -2.659399000 | 2.594691000  | -1.808132000 |
| 6 | -1.542166000 | 2.530446000  | -0.887642000 |
| 6 | -0.580280000 | 1.542271000  | -1.033845000 |
| 6 | 0.110280000  | 0.896170000  | 0.122356000  |
| 6 | 0.099724000  | -0.562132000 | -0.181974000 |
| 6 | -0.204097000 | -1.527274000 | 0.764464000  |
| 6 | -4.133115000 | -2.303677000 | 2.885818000  |
| 6 | -2.572128000 | -3.494552000 | -1.293318000 |
| 6 | -3.451246000 | -3.850428000 | -0.269497000 |
| 6 | -4.865638000 | -3.547988000 | -0.387709000 |
| 6 | -5.348983000 | -2.897051000 | -1.524597000 |
| 6 | -4.435798000 | -2.524523000 | -2.590864000 |
| 6 | -2.086067000 | -1.837132000 | -2.886487000 |
| 6 | -0.977028000 | -1.909858000 | -1.949899000 |
| 6 | -1.273142000 | -2.929932000 | -0.971531000 |
| 6 | -0.903586000 | -2.731635000 | -0.363415000 |
| 6 | -1.821237000 | -3.102945000 | 1.425868000  |
| 6 | -3.065386000 | -3.655137000 | 1.118758000  |
| 6 | -5.357455000 | -3.172690000 | 0.929196000  |
| 6 | -6.312453000 | -2.161751000 | 1.055523000  |
| 6 | -6.810650000 | -1.481343000 | -0.128257000 |

|    |              |              |              |                     |              |              |              |
|----|--------------|--------------|--------------|---------------------|--------------|--------------|--------------|
| 6  | -6.338993000 | -1.841279000 | -1.391248000 | 6                   | 4.833158000  | -5.268181000 | -1.555020000 |
| 6  | -6.035054000 | -0.814498000 | -2.374304000 | 1                   | 4.948816000  | -3.263665000 | -2.306215000 |
| 6  | -4.859914000 | -1.236532000 | -3.116156000 | 6                   | 4.874910000  | -6.095340000 | -0.431641000 |
| 6  | -3.906858000 | -0.293980000 | -3.507939000 | 1                   | 5.082682000  | -6.161052000 | 1.714314000  |
| 6  | -2.492296000 | -0.601277000 | -3.388351000 | 1                   | 4.689937000  | -5.698221000 | -2.542886000 |
| 6  | -0.325774000 | -0.741087000 | -1.546494000 | 1                   | 4.763525000  | -7.170944000 | -0.539466000 |
| 6  | -0.746751000 | 0.546042000  | -2.067270000 | 6                   | 3.266994000  | 5.383757000  | 1.751402000  |
| 6  | -1.806636000 | 0.613350000  | -2.976842000 | 1                   | 2.204847000  | 5.566572000  | 1.564593000  |
| 6  | -2.787085000 | 1.664516000  | -2.844858000 | 1                   | 3.366627000  | 5.106752000  | 2.806795000  |
| 6  | -4.089198000 | 1.108676000  | -3.171522000 | 6                   | 4.508473000  | 5.798918000  | -0.902587000 |
| 6  | -5.218363000 | 1.511598000  | -2.457208000 | 1                   | 5.567326000  | 5.629561000  | -0.668131000 |
| 6  | -6.210497000 | 0.533033000  | -2.052699000 | 1                   | 4.452280000  | 6.048164000  | -1.969360000 |
| 6  | -6.702326000 | 0.908286000  | -0.735585000 | 6                   | 4.078800000  | 6.645630000  | 1.436739000  |
| 6  | -6.998896000 | -0.079283000 | 0.206089000  | 1                   | 3.702723000  | 7.484734000  | 2.033762000  |
| 6  | -4.246637000 | -3.243114000 | 1.860177000  | 1                   | 5.130119000  | 6.501447000  | 1.727352000  |
| 6  | -6.195914000 | -1.182010000 | 2.121347000  | 6                   | 4.008326000  | 6.981564000  | -0.057787000 |
| 6  | -3.075573000 | -2.819060000 | -2.478964000 | 1                   | 4.610212000  | 7.868910000  | -0.286346000 |
| 6  | 1.008274000  | 1.526365000  | 1.155938000  | 1                   | 2.972282000  | 7.220905000  | -0.333916000 |
| 6  | 1.577906000  | 2.904196000  | 0.931457000  |                     |              |              |              |
| 7  | 2.913438000  | 2.981860000  | 1.198551000  | AF2 <sub>INT3</sub> |              |              |              |
| 8  | 0.890963000  | 3.850015000  | 0.543570000  | 6                   | 3.776614000  | 2.729360000  | -1.868086000 |
| 6  | 3.708912000  | 4.171418000  | 0.903006000  | 6                   | 4.819138000  | 1.862005000  | -2.392688000 |
| 1  | 4.734868000  | 3.914689000  | 1.193646000  | 6                   | 4.482771000  | 0.762156000  | -3.180523000 |
| 6  | 3.696651000  | 4.529890000  | -0.605281000 | 6                   | 3.087413000  | 0.481758000  | -3.474506000 |
| 1  | 2.650514000  | 4.688089000  | -0.880853000 | 6                   | 2.084990000  | 1.309335000  | -2.960850000 |
| 7  | 4.145241000  | 3.344575000  | -1.456059000 | 6                   | 2.432742000  | 2.455471000  | -2.141503000 |
| 1  | 1.701970000  | 0.818990000  | 1.602999000  | 6                   | 4.158478000  | 3.144083000  | -0.539968000 |
| 6  | 5.616485000  | 3.070769000  | -1.441030000 | 6                   | 5.440263000  | 2.534523000  | -0.229194000 |
| 1  | 6.145872000  | 3.852100000  | -1.988944000 | 6                   | 5.850052000  | 1.741278000  | -1.376539000 |
| 1  | 5.961937000  | 3.019804000  | -0.409963000 | 6                   | 6.500277000  | 0.520277000  | -1.185979000 |
| 1  | 5.796303000  | 2.099772000  | -1.904261000 | 6                   | 5.158483000  | -0.508385000 | -2.984723000 |
| 6  | 3.643007000  | 3.434422000  | -2.859081000 | 6                   | 2.898742000  | -0.949723000 | -3.465785000 |
| 1  | 3.879704000  | 2.494115000  | -3.358368000 | 6                   | 1.716296000  | -1.485285000 | -2.943902000 |
| 1  | 2.559665000  | 3.563705000  | -2.834904000 | 6                   | 0.672446000  | -0.615675000 | -2.439215000 |
| 1  | 4.113426000  | 4.270335000  | -3.380421000 | 6                   | 0.846176000  | 0.758895000  | -2.472208000 |
| 1  | 3.446362000  | 2.099564000  | 1.193630000  | 6                   | 0.301756000  | 1.674871000  | -1.426047000 |
| 6  | 6.752669000  | -1.195750000 | -0.185587000 | 6                   | 1.410538000  | 2.636999000  | -1.137377000 |
| 1  | 6.671009000  | -0.185461000 | 0.222984000  | 6                   | 1.785528000  | 2.999408000  | 0.146722000  |
| 6  | 7.812155000  | -1.964963000 | 0.598430000  | 6                   | 3.177027000  | 3.260380000  | 0.449449000  |
| 8  | 8.522789000  | -2.839367000 | 0.162806000  | 6                   | 5.698672000  | 2.074539000  | 1.062610000  |
| 16 | 7.894957000  | -1.438946000 | 2.330824000  | 6                   | 4.684557000  | 2.207158000  | 2.096748000  |
| 6  | 9.130762000  | -2.648022000 | 2.918349000  | 6                   | 3.451327000  | 2.783165000  | 1.793399000  |
| 1  | 8.765378000  | -3.665034000 | 2.765381000  | 6                   | 2.226249000  | 2.212641000  | 2.325617000  |
| 1  | 10.071078000 | -2.517241000 | 2.380304000  | 6                   | 1.189155000  | 2.342692000  | 1.322887000  |
| 1  | 9.277285000  | -2.456992000 | 3.983694000  | 6                   | 0.238174000  | 1.344080000  | 1.175802000  |
| 1  | 3.689094000  | 2.419794000  | -1.100651000 | 6                   | -0.342944000 | 0.958358000  | -0.146883000 |
| 6  | 7.099367000  | -1.002796000 | -1.650248000 | 6                   | -0.326396000 | -0.534010000 | -0.158843000 |
| 8  | 7.372562000  | -2.138654000 | -2.316903000 | 6                   | 0.077243000  | -1.274467000 | -1.259923000 |
| 8  | 7.108690000  | 0.083539000  | -2.199652000 | 6                   | 4.177712000  | -1.567600000 | -3.160891000 |
| 1  | 7.575188000  | -1.869224000 | -3.233546000 | 6                   | 2.310159000  | -3.627916000 | 0.525880000  |
| 6  | 5.287886000  | -1.803993000 | 0.049319000  | 6                   | 3.275999000  | -3.752876000 | -0.473332000 |
| 6  | 4.287278000  | -1.012801000 | -0.736999000 | 6                   | 4.669429000  | -3.478420000 | -0.176346000 |
| 1  | 5.113234000  | -1.592577000 | 1.110295000  | 6                   | 5.045076000  | -3.082993000 | 1.109053000  |
| 1  | 3.764066000  | -1.391896000 | -1.601933000 | 6                   | 4.041255000  | -2.949975000 | 2.150236000  |
| 7  | 4.023116000  | 0.231513000  | -0.413182000 | 6                   | 1.661791000  | -2.349722000 | 2.388270000  |
| 8  | 4.598499000  | 0.808152000  | 0.602481000  | 6                   | 0.633955000  | -2.224672000 | 1.367924000  |
| 8  | 3.166707000  | 0.934806000  | -1.121748000 | 6                   | 1.030675000  | -3.201042500 | 0.223079000  |
| 6  | 5.157694000  | -3.304729000 | -0.157081000 | 6                   | 0.766033000  | -2.534390000 | -1.065823000 |
| 6  | 5.191558000  | -4.147221000 | 0.963050000  | 6                   | 1.773232000  | -2.668490000 | -2.103458000 |
| 6  | 4.973459000  | -3.887438000 | -1.418745000 | 6                   | 2.999701000  | -3.267979000 | -1.816403000 |
| 6  | 5.055609000  | -5.529395000 | 0.830262000  | 6                   | 5.258105000  | -2.829550000 | -1.337985000 |
| 1  | 5.319578000  | -3.712522000 | 1.951571000  | 6                   | 6.198423000  | -1.811609000 | -1.166773000 |



|    |              |              |              |      |              |              |              |
|----|--------------|--------------|--------------|------|--------------|--------------|--------------|
| 6  | 6.078305000  | 1.669282000  | 0.925445000  | 1    | -9.315979000 | 0.659823000  | -1.901128000 |
| 6  | 6.373472000  | 1.267241000  | -0.439878000 | 1    | -4.539729000 | 2.083805000  | 1.654875000  |
| 6  | 5.701877000  | 1.866990000  | -1.505690000 | 7    | -3.841724000 | 0.223555000  | 1.015041000  |
| 6  | 5.238606000  | 1.058191000  | -2.620758000 | 8    | -3.638444000 | -0.453881000 | 0.008387000  |
| 6  | 3.957739000  | 1.586220000  | -3.057006000 | 8    | -3.953132000 | -0.225619000 | 2.151091000  |
| 6  | 2.952137000  | 0.715092000  | -3.480529000 | 1    | -2.856794000 | 2.039625000  | 1.103605000  |
| 6  | 1.577940000  | 0.944670000  | -3.071823000 | 1    | -4.849682000 | 4.299015000  | -0.052611000 |
| 6  | -0.256211000 | 0.624442000  | -0.919236000 | 1    | -1.969194000 | 2.939424000  | -1.721857000 |
| 6  | 0.070867000  | -0.511125000 | -1.761499000 | 6    | -3.143759000 | -5.460574000 | -1.080073000 |
| 6  | 0.967642000  | -0.351560000 | -2.820790000 | 1    | -3.106705000 | -4.777600000 | -1.940751000 |
| 6  | 1.952770000  | -1.375475000 | -3.073171000 | 1    | -2.116768000 | -5.763519000 | -0.860053000 |
| 6  | 3.184041000  | -0.720655000 | -3.480593000 | 6    | -6.034982000 | -5.481306000 | -0.449447000 |
| 6  | 4.414074000  | -1.225558000 | -3.058611000 | 1    | -6.074854000 | -6.127038000 | 0.438722000  |
| 6  | 5.461345000  | -0.320218000 | -2.622739000 | 1    | -7.064849000 | -5.163069000 | -0.653943000 |
| 6  | 6.162595000  | -0.945389000 | -1.511845000 | 6    | -5.481663000 | -6.284027000 | -1.638445000 |
| 6  | 6.612649000  | -0.166412000 | -0.443876000 | 1    | -5.555353000 | -5.673433000 | -2.550494000 |
| 6  | 4.176237000  | 2.490528000  | 2.263319000  | 1    | -6.098242000 | -7.175364000 | -1.810716000 |
| 6  | 6.137535000  | 0.485571000  | 1.764833000  | 6    | -4.015462000 | -6.680526000 | -1.412357000 |
| 6  | 2.304842000  | 2.942558000  | -1.821828000 | 1    | -3.958162000 | -7.402457000 | -0.584577000 |
| 6  | -1.109569000 | -2.233943000 | 1.408680000  | 1    | -3.618110000 | -7.193121000 | -2.297083000 |
| 6  | -1.658052000 | -3.590831000 | 0.973924000  |      |              |              |              |
| 7  | -2.912664000 | -3.514499000 | 0.471471000  |      |              |              |              |
| 8  | -1.006157000 | -4.625846000 | 1.078106000  |      |              |              |              |
| 6  | -3.705642000 | -4.693668000 | 0.132100000  |      |              |              |              |
| 1  | -3.690656000 | -5.380032000 | 0.991997000  |      |              |              |              |
| 6  | -5.157877000 | -4.244926000 | -0.152228000 |      |              |              |              |
| 1  | -5.118007000 | -3.641797000 | -1.071614000 |      |              |              |              |
| 7  | -5.648465000 | -3.323073000 | 0.882864000  |      |              |              |              |
| 1  | -1.763428000 | -1.695156000 | 2.093183000  |      |              |              |              |
| 6  | -5.889660000 | -3.911851000 | 2.194187000  |      |              |              |              |
| 1  | -6.772825000 | -4.575728000 | 2.231425000  |      |              |              |              |
| 1  | -5.017716000 | -4.485931000 | 2.520978000  |      |              |              |              |
| 1  | -6.046351000 | -3.106351000 | 2.920169000  |      |              |              |              |
| 6  | -6.761844000 | -2.489993000 | 0.450951000  |      |              |              |              |
| 1  | -6.940972000 | -1.712384000 | 1.202101000  |      |              |              |              |
| 1  | -6.512011000 | -1.991723000 | -0.491278000 |      |              |              |              |
| 1  | -7.710499000 | -3.042119000 | 0.310627000  |      |              |              |              |
| 1  | -3.431689000 | -2.643955000 | 0.564512000  |      |              |              |              |
| 6  | -4.137115000 | 3.703637000  | -0.612836000 |      |              |              |              |
| 6  | -3.230880000 | 4.362736000  | -1.358336000 |      |              |              |              |
| 8  | -2.209549000 | 3.812900000  | -2.077601000 |      |              |              |              |
| 16 | -3.367367000 | 6.118878000  | -1.600442000 |      |              |              |              |
| 6  | -1.615846000 | 6.643152000  | -1.466351000 |      |              |              |              |
| 1  | -1.237118000 | 6.504712000  | -0.450597000 |      |              |              |              |
| 1  | -1.000021000 | 6.090932000  | -2.176843000 |      |              |              |              |
| 1  | -1.598520000 | 7.706790000  | -1.716797000 |      |              |              |              |
| 6  | -5.495781000 | 5.367187000  | 3.259665000  |      |              |              |              |
| 8  | -5.634365000 | 4.345734000  | 2.703816000  |      |              |              |              |
| 8  | -5.358933000 | 6.383366000  | 3.816219000  |      |              |              |              |
| 6  | -4.290865000 | 2.197153000  | -0.539073000 |      |              |              |              |
| 1  | -3.607791000 | 1.721716000  | -1.250555000 |      |              |              |              |
| 6  | -3.878636000 | 1.727780000  | 0.865078000  |      |              |              |              |
| 6  | -5.708888000 | 1.760122000  | -0.905550000 |      |              |              |              |
| 6  | -6.810355000 | 2.122079000  | -0.117083000 |      |              |              |              |
| 6  | -5.931200000 | 0.996140000  | -2.057173000 |      |              |              |              |
| 6  | -8.100465000 | 1.726493000  | -0.472389000 |      |              |              |              |
| 1  | -6.668860000 | 2.723181000  | 0.777885000  |      |              |              |              |
| 6  | -7.221286000 | 0.602704000  | -2.416786000 |      |              |              |              |
| 1  | -5.086695000 | 0.704688000  | -2.676401000 |      |              |              |              |
| 6  | -8.310886000 | 0.965499000  | -1.623722000 |      |              |              |              |
| 1  | -8.942395000 | 2.016777000  | 0.150539000  |      |              |              |              |
| 1  | -7.373069000 | 0.012939000  | -3.316927000 |      |              |              |              |
|    |              |              |              | AF2p |              |              |              |
|    |              |              |              | 6    | 2.276707000  | 0.799402000  | -3.317156000 |
|    |              |              |              | 6    | 2.993938000  | -0.453036000 | -3.492769000 |
|    |              |              |              | 6    | 2.432606000  | -1.649460000 | -3.048270000 |
|    |              |              |              | 6    | 1.129965000  | -1.642126000 | -2.404270000 |
|    |              |              |              | 6    | 0.446156000  | -0.436487000 | -2.224312000 |
|    |              |              |              | 6    | 1.027902000  | 0.809524000  | -2.687548000 |
|    |              |              |              | 6    | 3.235798000  | 1.830034000  | -3.002320000 |
|    |              |              |              | 6    | 4.556220000  | 1.224156000  | -2.978108000 |
|    |              |              |              | 6    | 4.406810000  | -0.189662000 | -3.282502000 |
|    |              |              |              | 6    | 5.201516000  | -1.133813000 | -2.628992000 |
|    |              |              |              | 6    | 3.257572000  | -2.632720000 | -2.369007000 |
|    |              |              |              | 6    | 1.142771000  | -2.616231000 | -1.338176000 |
|    |              |              |              | 6    | 0.471285000  | -2.336464000 | -0.141519000 |
|    |              |              |              | 6    | -0.259286000 | -1.094731000 | 0.022052000  |
|    |              |              |              | 6    | -0.289603000 | -0.172437000 | -1.013752000 |
|    |              |              |              | 6    | -0.323161000 | 1.303040000  | -0.792528000 |
|    |              |              |              | 6    | 0.654842000  | 1.864670000  | -1.774979000 |
|    |              |              |              | 6    | 1.591869000  | 2.831406000  | -1.446324000 |
|    |              |              |              | 6    | 2.897975000  | 2.816388000  | -2.070117000 |
|    |              |              |              | 6    | 5.495371000  | 1.636074000  | -2.031842000 |
|    |              |              |              | 6    | 5.151555000  | 2.672844000  | -1.071363000 |
|    |              |              |              | 6    | 3.879641000  | 3.244496000  | -1.089167000 |
|    |              |              |              | 6    | 3.181114000  | 3.516969000  | 0.154721000  |
|    |              |              |              | 6    | 1.768687000  | 3.270987000  | -0.051415000 |
|    |              |              |              | 6    | 1.004404000  | 2.726726000  | 0.969058000  |
|    |              |              |              | 6    | -0.126689000 | 1.778848000  | 0.729480000  |
|    |              |              |              | 6    | 0.061341000  | 0.689965000  | 1.730467000  |
|    |              |              |              | 6    | -0.080334000 | -0.654900000 | 1.422005000  |
|    |              |              |              | 6    | 2.459680000  | -3.230348000 | -1.309918000 |
|    |              |              |              | 6    | 3.016578000  | -1.855218000 | 3.062735000  |
|    |              |              |              | 6    | 3.337170000  | -2.851544000 | 2.139721000  |
|    |              |              |              | 6    | 4.640733000  | -2.860409000 | 1.502383000  |
|    |              |              |              | 6    | 5.574587000  | -1.868361000 | 1.808127000  |
|    |              |              |              | 6    | 5.242871000  | -0.829502000 | 2.767374000  |
|    |              |              |              | 6    | 3.274222000  | 0.427707000  | 3.557121000  |
|    |              |              |              | 6    | 1.861967000  | 0.163759000  | 3.338758000  |
|    |              |              |              | 6    | 1.701200000  | -1.239337000 | 3.038221000  |
|    |              |              |              | 6    | 0.755616000  | -1.636145000 | 2.085953000  |
|    |              |              |              | 6    | 1.093298000  | -2.672853000 | 1.126860000  |
|    |              |              |              | 6    | 2.353570000  | -3.271840000 | 1.154798000  |

|    |              |              |              |
|----|--------------|--------------|--------------|
| 6  | 4.465388000  | -3.293814000 | 0.124579000  |
| 6  | 5.230965000  | -2.717404000 | -0.890996000 |
| 6  | 6.199670000  | -1.681713000 | -0.571860000 |
| 6  | 6.367790000  | -1.266061000 | 0.749494000  |
| 6  | 6.523454000  | 0.146720000  | 1.053931000  |
| 6  | 5.829233000  | 0.416811000  | 2.300716000  |
| 6  | 5.139124000  | 1.619177000  | 2.468157000  |
| 6  | 3.834279000  | 1.622329000  | 3.106571000  |
| 6  | 1.070474000  | 1.103379000  | 2.672353000  |
| 6  | 1.650791000  | 2.348162000  | 2.204187000  |
| 6  | 3.007631000  | 2.604884000  | 2.424166000  |
| 6  | 3.792730000  | 3.206247000  | 1.373539000  |
| 6  | 5.112742000  | 2.599362000  | 1.394715000  |
| 6  | 5.778885000  | 2.336926000  | 0.197040000  |
| 6  | 6.498606000  | 1.088966000  | 0.023624000  |
| 6  | 6.323162000  | 0.655521000  | -1.354392000 |
| 6  | 6.179641000  | -0.702536000 | -1.645836000 |
| 6  | 3.053400000  | -3.552180000 | -0.088385000 |
| 6  | 4.615176000  | -2.380028000 | -2.162449000 |
| 6  | 3.990384000  | -0.823813000 | 3.384132000  |
| 6  | -1.413775000 | 2.014107000  | -0.029362000 |
| 6  | -1.836903000 | 3.420993000  | -0.393912000 |
| 7  | -3.142237000 | 3.686107000  | -0.121972000 |
| 8  | -1.046878000 | 4.241592000  | -0.854057000 |
| 6  | -3.786208000 | 4.942317000  | -0.506554000 |
| 1  | -3.644461000 | 5.094382000  | -1.587889000 |
| 6  | -5.295892000 | 4.819788000  | -0.190498000 |
| 1  | -5.375562000 | 4.790889000  | 0.906451000  |
| 7  | -5.827426000 | 3.526246000  | -0.640413000 |
| 1  | -2.219545000 | 1.352922000  | 0.279181000  |
| 6  | -5.945472000 | 3.351769000  | -2.084748000 |
| 1  | -6.757665000 | 3.948627000  | -2.537861000 |
| 1  | -5.007564000 | 3.623147000  | -2.578901000 |
| 1  | -6.141765000 | 2.295306000  | -2.290808000 |
| 6  | -7.042456000 | 3.110475000  | 0.048987000  |
| 1  | -7.242571000 | 2.061952000  | -0.190767000 |
| 1  | -6.899130000 | 3.192462000  | 1.132079000  |
| 1  | -7.935722000 | 3.703033000  | -0.224494000 |
| 1  | -3.800748000 | 2.914321000  | -0.018270000 |
| 6  | -3.750332000 | -3.968284000 | 0.337844000  |
| 6  | -2.794907000 | -4.328616000 | -0.794381000 |
| 8  | -2.630886000 | -3.659878000 | -1.795440000 |
| 16 | -1.930256000 | -5.879557000 | -0.528816000 |
| 6  | -0.987037000 | -5.960258000 | -2.090771000 |
| 1  | -1.666797000 | -5.940103000 | -2.944170000 |
| 1  | -0.295317000 | -5.118377000 | -2.151113000 |
| 1  | -0.433574000 | -6.901492000 | -2.072848000 |
| 6  | -8.219103000 | -5.219276000 | -1.350228000 |
| 8  | -7.286732000 | -4.750194000 | -0.818535000 |
| 8  | -9.147312000 | -5.687804000 | -1.878816000 |
| 1  | -3.331002000 | -4.324072000 | 1.284958000  |
| 6  | -4.059041000 | -2.453748000 | 0.457655000  |
| 1  | -3.108872000 | -1.913547000 | 0.413846000  |
| 6  | -4.896802000 | -1.999164000 | -0.744666000 |
| 6  | -4.726675000 | -2.148743000 | 1.793177000  |
| 6  | -6.007849000 | -2.630860000 | 2.099321000  |
| 6  | -4.048677000 | -1.390033000 | 2.755457000  |
| 6  | -6.594558000 | -2.358097000 | 3.335500000  |
| 1  | -6.555867000 | -3.226684000 | 1.373187000  |
| 6  | -4.632965000 | -1.118278000 | 3.993414000  |
| 1  | -3.055304000 | -1.008238000 | 2.532471000  |
| 6  | -5.908808000 | -1.600778000 | 4.286871000  |

|   |              |              |              |
|---|--------------|--------------|--------------|
| 1 | -7.588571000 | -2.738639000 | 3.555311000  |
| 1 | -4.090782000 | -0.526619000 | 4.726094000  |
| 1 | -6.366274000 | -1.388442000 | 5.249317000  |
| 1 | -5.869528000 | -2.486217000 | -0.805792000 |
| 7 | -5.192452000 | -0.521519000 | -0.729664000 |
| 8 | -4.325917000 | 0.239341000  | -0.304970000 |
| 8 | -6.275505000 | -0.171460000 | -1.190533000 |
| 1 | -4.343364000 | -2.171557000 | -1.671297000 |
| 1 | -4.676185000 | -4.539472000 | 0.183158000  |
| 6 | -3.204713000 | 6.172461000  | 0.213460000  |
| 1 | -3.309112000 | 6.027292000  | 1.298233000  |
| 1 | -2.136845000 | 6.243365000  | -0.005283000 |
| 6 | -6.032904000 | 6.087335000  | -0.672040000 |
| 1 | -5.940995000 | 6.176698000  | -1.763286000 |
| 1 | -7.104120000 | 5.999534000  | -0.451623000 |
| 6 | -5.454090000 | 7.345834000  | -0.003698000 |
| 1 | -5.959045000 | 8.242105000  | -0.385810000 |
| 1 | -5.663099000 | 7.307147000  | 1.075569000  |
| 6 | -3.937176000 | 7.451345000  | -0.221341000 |
| 1 | -3.735696000 | 7.637136000  | -1.286481000 |
| 1 | -3.534053000 | 8.313862000  | 0.323547000  |

Cartesian coordinates of all transition states in both the pathways

| ${}^{\text{D}}\text{F1}_{\text{TS1}}$ |              |              |              |
|---------------------------------------|--------------|--------------|--------------|
| 6                                     | 0.362637000  | -1.272973000 | 2.758325000  |
| 6                                     | 1.311526000  | -0.412859000 | 3.447255000  |
| 6                                     | 1.211359000  | 0.972921000  | 3.331197000  |
| 6                                     | 0.158023000  | 1.556897000  | 2.517895000  |
| 6                                     | -0.746633000 | 0.729258000  | 1.847296000  |
| 6                                     | -0.644942000 | -0.713127000 | 1.966884000  |
| 6                                     | 1.069124000  | -2.438783000 | 2.284524000  |
| 6                                     | 2.462956000  | -2.309244000 | 2.674026000  |
| 6                                     | 2.613155000  | -1.055220000 | 3.394193000  |
| 6                                     | 3.764058000  | -0.283300000 | 3.221932000  |
| 6                                     | 2.406953000  | 1.777707000  | 3.152238000  |
| 6                                     | 0.693110000  | 2.715638000  | 1.842482000  |
| 6                                     | 0.297267000  | 2.992453000  | 0.529103000  |
| 6                                     | -0.662639000 | 2.142219000  | -0.146713000 |
| 6                                     | -1.193599000 | 1.044861000  | 0.513969000  |
| 6                                     | -1.544996000 | -0.227628000 | -0.180018000 |
| 6                                     | -1.033443000 | -1.312394000 | 0.711144000  |
| 6                                     | -0.329687000 | -2.410980000 | 0.241865000  |
| 6                                     | 0.734076000  | -2.984372000 | 1.041000000  |
| 6                                     | 3.470959000  | -2.740588000 | 1.810843000  |
| 6                                     | 3.124778000  | -3.320917000 | 0.523001000  |
| 6                                     | 1.786511000  | -3.434366000 | 0.147053000  |
| 6                                     | 1.379921000  | -3.130520000 | -1.213782000 |
| 6                                     | 0.075837000  | -2.502890000 | -1.171707000 |
| 6                                     | -0.238040000 | -1.494618000 | -2.069466000 |
| 6                                     | -1.107747000 | -0.329423000 | -1.719751000 |
| 6                                     | -0.397388000 | 0.863536000  | -2.267753000 |
| 6                                     | -0.257257000 | 2.049567000  | -1.563989000 |
| 6                                     | 2.085891000  | 2.856318000  | 2.230931000  |
| 6                                     | 3.354268000  | 2.568301000  | -2.199712000 |
| 6                                     | 3.677989000  | 3.129285000  | -0.963631000 |
| 6                                     | 4.733961000  | 2.548219000  | -0.155438000 |
| 6                                     | 5.424931000  | 1.423861000  | -0.611721000 |
| 6                                     | 5.089154000  | 0.837542000  | -1.897387000 |
| 6                                     | 3.127467000  | 0.538169000  | -3.361151000 |
| 6                                     | 1.824351000  | 1.178702000  | -3.301859000 |





|    |             |              |              |   |              |              |              |
|----|-------------|--------------|--------------|---|--------------|--------------|--------------|
| 8  | 2.719519000 | 3.079497000  | -0.533158000 | 6 | 2.428917000  | 2.623530000  | 2.426704000  |
| 6  | 5.404271000 | 2.984385000  | -0.961722000 | 6 | 2.540608000  | 2.866032000  | -2.183043000 |
| 1  | 5.245914000 | 3.511345000  | -1.913644000 | 6 | 3.100530000  | 3.371280000  | -1.008917000 |
| 1  | 5.094737000 | 3.686269000  | -0.181028000 | 6 | 4.391369000  | 2.890091000  | -0.553087000 |
| 6  | 6.895506000 | 2.680215000  | -0.873448000 | 6 | 5.073210000  | 1.917065000  | -1.286628000 |
| 1  | 7.445641000 | 3.626442000  | -0.849834000 | 6 | 4.492124000  | 1.388852000  | -2.508456000 |
| 1  | 7.227788000 | 2.103549000  | -1.741126000 | 6 | 2.271570000  | 0.920401000  | -3.473033000 |
| 7  | 7.319298000 | 1.863959000  | 0.320815000  | 6 | 0.959679000  | 1.357291000  | -3.025688000 |
| 1  | 3.046811000 | -0.215997000 | -0.633494000 | 6 | 1.122720000  | 2.554522000  | -2.235319000 |
| 6  | 6.676922000 | 2.256096000  | 1.609145000  | 6 | 0.316531000  | 2.751748000  | -1.108827000 |
| 1  | 6.932578000 | 3.292767000  | 1.845459000  | 6 | 0.903142000  | 3.278400000  | 0.111016000  |
| 1  | 5.597525000 | 2.143460000  | 1.516605000  | 6 | 2.263283000  | 3.585842000  | 0.160417000  |
| 1  | 7.045819000 | 1.580141000  | 2.379425000  | 6 | 4.356295000  | 2.813723000  | 0.899508000  |
| 6  | 8.806417000 | 1.870584000  | 0.445662000  | 6 | 5.004230000  | 1.767198000  | 1.559092000  |
| 1  | 9.083371000 | 1.152766000  | 1.216684000  | 6 | 5.709532000  | 0.752399000  | 0.794023000  |
| 1  | 9.241076000 | 1.573857000  | -0.510653000 | 6 | 5.743071000  | 0.825723000  | -0.598963000 |
| 1  | 9.141367000 | 2.877406000  | 0.709682000  | 6 | 5.572978000  | -0.378150000 | -1.395619000 |
| 1  | 4.984599000 | 0.876552000  | -0.997175000 | 6 | 4.800756000  | -0.030677000 | -2.575505000 |
| 6  | 8.389632000 | -1.684719000 | -0.389082000 | 6 | 3.856874000  | -0.927632000 | -3.079990000 |
| 1  | 8.841979000 | -2.654479000 | -0.561919000 | 6 | 2.566076000  | -0.440942000 | -3.534825000 |
| 6  | 7.086424000 | -1.460618000 | -0.810208000 | 6 | -0.000832000 | 0.413657000  | -2.651277000 |
| 8  | 6.439391000 | -0.354396000 | -0.748786000 | 6 | 0.302696000  | -1.003894000 | -2.716468000 |
| 16 | 6.257163000 | -2.925818000 | -1.482490000 | 6 | 1.562225000  | -1.422653000 | -3.156667000 |
| 6  | 4.504190000 | -2.435144000 | -1.433560000 | 6 | 2.224426000  | -2.508425000 | -2.475440000 |
| 1  | 4.174515000 | -2.248066000 | -0.408384000 | 6 | 3.644961000  | -2.207480000 | -2.423629000 |
| 1  | 4.325903000 | -1.556204000 | -2.056749000 | 6 | 4.386881000  | -2.538529000 | -1.289157000 |
| 1  | 3.937974000 | -3.277516000 | -1.839143000 | 6 | 5.369775000  | -1.608014000 | -0.766246000 |
| 1  | 7.021750000 | 0.846251000  | 0.063407000  | 6 | 5.334378000  | -1.684448000 | 0.686441000  |
| 1  | 9.069439000 | -0.841145000 | -0.318697000 | 6 | 5.503686000  | -0.528010000 | 1.450515000  |
| 6  | 8.045981000 | -1.786777000 | 1.851379000  | 6 | 3.043411000  | 3.247221000  | 1.340135000  |
| 8  | 7.836862000 | -0.639251000 | 2.133872000  | 6 | 4.365756000  | 1.115085000  | 2.688960000  |
| 8  | 8.204031000 | -2.931956000 | 2.107891000  | 6 | 3.252070000  | 1.855054000  | -2.949290000 |

DFITS3

|   |              |              |              |    |              |              |              |
|---|--------------|--------------|--------------|----|--------------|--------------|--------------|
| 6 | 1.414973000  | -1.741382000 | 2.895856000  | 6  | -2.545642000 | -0.913054000 | -0.195154000 |
| 6 | 2.397012000  | -0.807415000 | 3.423337000  | 6  | -3.271121000 | -2.235873000 | -0.265330000 |
| 6 | 2.102632000  | 0.553757000  | 3.490721000  | 7  | -4.627135000 | -2.119797000 | -0.181209000 |
| 6 | 0.812802000  | 1.038805000  | 3.029066000  | 8  | -2.683980000 | -3.307993000 | -0.371288000 |
| 6 | -0.126297000 | 0.142079000  | 2.511716000  | 6  | -5.504425000 | -3.275062000 | -0.295037000 |
| 6 | 0.177185000  | -1.275430000 | 2.441546000  | 1  | -4.889185000 | -4.116330000 | -0.622889000 |
| 6 | 2.112072000  | -2.751306000 | 2.136870000  | 1  | -5.912315000 | -3.541149000 | 0.689542000  |
| 6 | 3.532734000  | -2.450272000 | 2.186144000  | 1  | -6.630106000 | -3.027061000 | -1.300966000 |
| 6 | 3.709472000  | -1.247112000 | 2.982872000  | 6  | -7.215330000 | -3.959890000 | -1.423146000 |
| 6 | 4.674254000  | -0.304437000 | 2.621557000  | 1  | -6.174661000 | -2.803301000 | -2.272104000 |
| 6 | 3.104790000  | 1.535786000  | 3.115822000  | 7  | -7.487221000 | -1.893484000 | -0.935549000 |
| 6 | 1.010865000  | 2.311848000  | 2.377022000  | 1  | -3.190193000 | -0.038334000 | -0.159140000 |
| 6 | 0.259762000  | 2.628678000  | 1.239490000  | 6  | -8.392547000 | -2.217909000 | 0.164592000  |
| 6 | -0.730669000 | 1.702138000  | 0.727992000  | 1  | -9.103496000 | -3.027567000 | -0.090764000 |
| 6 | -0.936282000 | 0.491162000  | 1.371677000  | 1  | -7.828323000 | -2.528469000 | 1.048530000  |
| 6 | -1.297609000 | -0.762231000 | 0.647225000  | 1  | -8.970292000 | -1.328621000 | 0.436834000  |
| 6 | -0.445597000 | -1.826864000 | 1.260319000  | 6  | -8.240344000 | -1.410358000 | -2.089780000 |
| 6 | 0.242522000  | -2.770803000 | 0.513827000  | 1  | -8.839571000 | -0.539725000 | -1.800772000 |
| 6 | 1.537391000  | -3.242007000 | 0.959977000  | 1  | -7.550244000 | -1.101973000 | -2.881841000 |
| 6 | 4.329456000  | -2.662066000 | 1.060420000  | 1  | -8.929229000 | -2.169332000 | -2.508051000 |
| 6 | 3.737117000  | -3.185897000 | -0.160307000 | 1  | -5.058856000 | -1.200414000 | -0.142996000 |
| 6 | 2.371308000  | -3.463701000 | -0.208247000 | 8  | -5.710880000 | 4.015266000  | -1.886936000 |
| 6 | 1.594606000  | -3.118377000 | -1.385816000 | 6  | -6.382933000 | 1.124884000  | 1.163048000  |
| 6 | 0.278504000  | -2.693595000 | -0.956943000 | 8  | -5.411190000 | 0.864254000  | 0.329442000  |
| 6 | -0.375642000 | -1.675551000 | -1.632563000 | 16 | -6.334397000 | 0.660839000  | 2.824734000  |
| 6 | -1.261403000 | -0.679675000 | -0.953712000 | 6  | -4.587042000 | 0.153404000  | 3.051678000  |
| 6 | -0.865418000 | 0.642643000  | -1.521584000 | 1  | -4.419737000 | 0.095351000  | 4.129701000  |
| 6 | -0.695212000 | 1.779174000  | -0.746565000 | 1  | -4.411302000 | -0.821360000 | 2.595041000  |
|   |              |              |              | 1  | -3.922352000 | 0.899132000  | 2.611595000  |
|   |              |              |              | 6  | -6.718807000 | 4.451841000  | -1.484195000 |

|   |              |             |              |
|---|--------------|-------------|--------------|
| 8 | -7.724620000 | 4.904795000 | -1.098050000 |
| 6 | -7.383794000 | 1.883112000 | 0.492942000  |
| 1 | -8.026899000 | 2.568626000 | 1.040945000  |
| 1 | -6.077265000 | 1.724780000 | -0.299321000 |
| 1 | -7.913528000 | 1.288743000 | -0.256469000 |

DF<sub>TS1</sub>

|   |              |              |              |
|---|--------------|--------------|--------------|
| 6 | 0.927299000  | -0.713922000 | 3.014173000  |
| 6 | 1.991460000  | 0.156615000  | 3.487966000  |
| 6 | 1.992914000  | 1.508484000  | 3.146896000  |
| 6 | 0.929867000  | 2.046288000  | 2.314552000  |
| 6 | -0.086436000 | 1.206668000  | 1.850575000  |
| 6 | -0.090371000 | -0.200465000 | 2.204359000  |
| 6 | 1.500623000  | -2.000471000 | 2.699593000  |
| 6 | 2.926062000  | -1.936879000 | 2.974038000  |
| 6 | 3.230120000  | -0.601600000 | 3.462366000  |
| 6 | 4.421928000  | 0.024242000  | 3.090839000  |
| 6 | 3.231339000  | 2.161378000  | 2.760623000  |
| 6 | 1.501826000  | 3.026599000  | 1.421673000  |
| 6 | 1.029619000  | 3.121356000  | 0.107782000  |
| 6 | -0.043935000 | 2.263815000  | -0.354032000 |
| 6 | -0.607953000 | 1.340984000  | 0.513768000  |
| 6 | -1.111561000 | 0.010392000  | 0.067234000  |
| 6 | -0.620487000 | -0.957606000 | 1.093800000  |
| 6 | -0.044274000 | -2.177303000 | 0.772730000  |
| 6 | 1.028846000  | -2.707743000 | 1.588996000  |
| 6 | 3.827440000  | -2.592427000 | 2.134431000  |
| 6 | 3.338565000  | -3.340168000 | 0.986738000  |
| 6 | 1.970575000  | -3.390600000 | 0.719485000  |
| 6 | 1.486330000  | -3.275386000 | -0.644887000 |
| 6 | 0.243170000  | -2.533718000 | -0.627768000 |
| 6 | -0.057825000 | -1.659979000 | -1.660727000 |
| 6 | -0.803986000 | -0.379677000 | -1.459039000 |
| 6 | -0.044397000 | 0.639106000  | -2.242099000 |
| 6 | 0.243062000  | 1.905821000  | -1.758068000 |
| 6 | 2.927057000  | 3.100895000  | 1.692959000  |
| 6 | 3.824883000  | 1.983927000  | -2.696510000 |
| 6 | 4.285975000  | 2.706113000  | -1.595048000 |
| 6 | 5.351240000  | 2.170121000  | -0.768340000 |
| 6 | 5.914024000  | 0.928693000  | -1.071413000 |
| 6 | 5.435242000  | 0.174647000  | -2.216622000 |
| 6 | 3.349454000  | -0.178477000 | -3.483690000 |
| 6 | 2.109582000  | 0.579081000  | -3.451647000 |
| 6 | 2.400266000  | 1.908976000  | -2.970650000 |
| 6 | 1.486620000  | 2.551837000  | -2.128105000 |
| 6 | 1.970800000  | 3.303127000  | -0.983217000 |
| 6 | 3.339431000  | 3.383518000  | -0.723487000 |
| 6 | 5.068493000  | 2.522079000  | 0.614794000  |
| 6 | 5.359737000  | 1.618016000  | 1.638385000  |
| 6 | 5.940800000  | 0.324100000  | 1.321098000  |
| 6 | 6.212037000  | -0.013376000 | -0.005434000 |
| 6 | 5.914057000  | -1.350301000 | -0.491993000 |
| 6 | 5.434875000  | -1.234749000 | -1.858155000 |
| 6 | 4.411848000  | -2.070355000 | -2.311177000 |
| 6 | 3.347387000  | -1.529138000 | -3.138208000 |
| 6 | 0.919568000  | -0.044589000 | -3.066586000 |
| 6 | 0.914629000  | -1.450729000 | -2.707827000 |
| 6 | 2.106946000  | -2.180529000 | -2.749237000 |
| 6 | 2.399655000  | -3.118146000 | -1.692433000 |
| 6 | 3.824530000  | -3.053550000 | -1.415439000 |
| 6 | 4.285416000  | -3.161682000 | -0.102801000 |
| 6 | 5.350561000  | -2.295781000 | 0.367382000  |

|    |              |              |              |
|----|--------------|--------------|--------------|
| 6  | 5.067516000  | -1.943850000 | 1.750704000  |
| 6  | 5.359287000  | -0.660792000 | 2.218127000  |
| 6  | 3.828215000  | 3.274930000  | 0.641808000  |
| 6  | 4.422596000  | 1.433667000  | 2.732631000  |
| 6  | 4.412818000  | 0.692156000  | -3.014282000 |
| 6  | -2.210265000 | -0.165719000 | -0.955230000 |
| 6  | -3.186474000 | -1.304779000 | -0.825520000 |
| 7  | -4.488506000 | -0.927497000 | -0.962338000 |
| 8  | -2.835237000 | -2.461684000 | -0.593864000 |
| 6  | -5.596367000 | -1.868984000 | -0.882336000 |
| 1  | -5.133268000 | -2.858411000 | -0.826987000 |
| 6  | -6.516505000 | -1.667173000 | 0.356989000  |
| 1  | -6.987544000 | -0.679173000 | 0.274045000  |
| 7  | -5.758756000 | -1.588831000 | 1.660328000  |
| 1  | -2.651633000 | 0.776367000  | -1.271095000 |
| 6  | -4.870597000 | -2.739443000 | 1.954610000  |
| 1  | -4.143887000 | -2.881679000 | 1.153961000  |
| 1  | -4.329266000 | -2.517358000 | 2.878441000  |
| 1  | -5.449296000 | -3.659114000 | 2.103400000  |
| 6  | -6.654427000 | -1.326947000 | 2.815794000  |
| 1  | -6.026300000 | -1.077754000 | 3.675628000  |
| 1  | -7.280577000 | -0.463247000 | 2.588713000  |
| 1  | -7.263065000 | -2.201335000 | 3.066601000  |
| 1  | -4.683961000 | 0.050730000  | -1.154688000 |
| 6  | -4.571284000 | 2.820635000  | 0.812766000  |
| 1  | -3.486782000 | 2.692732000  | 0.812544000  |
| 6  | -5.027640000 | 2.917186000  | -0.636794000 |
| 8  | -4.559814000 | 2.192475000  | -1.503046000 |
| 16 | -6.310594000 | 4.056571000  | -1.129316000 |
| 6  | -6.982001000 | 4.733695000  | 0.435554000  |
| 1  | -7.204031000 | 3.915149000  | 1.122815000  |
| 1  | -6.303610000 | 5.461068000  | 0.888236000  |
| 1  | -7.910130000 | 5.240953000  | 0.159345000  |
| 1  | -5.064847000 | -0.481873000 | 1.627572000  |
| 1  | -4.843023000 | 3.699339000  | 1.398222000  |
| 6  | -5.261383000 | 1.570776000  | 1.397162000  |
| 8  | -6.485964000 | 1.580179000  | 1.555831000  |
| 8  | -4.463863000 | 0.567383000  | 1.589008000  |
| 6  | -6.439932000 | -1.795680000 | -2.172875000 |
| 1  | -6.854480000 | -0.781710000 | -2.272942000 |
| 1  | -5.770187000 | -1.947782000 | -3.026380000 |
| 6  | -7.577086000 | -2.823770000 | -2.184036000 |
| 1  | -8.175647000 | -2.709663000 | -3.095683000 |
| 1  | -7.150615000 | -3.836687000 | -2.213485000 |
| 6  | -7.623987000 | -2.740751000 | 0.348465000  |
| 1  | -7.172374000 | -3.738431000 | 0.439471000  |
| 1  | -8.284481000 | -2.609611000 | 1.211333000  |
| 6  | -8.459469000 | -2.678186000 | -0.940081000 |
| 1  | -9.227807000 | -3.460257000 | -0.917645000 |
| 1  | -8.991511000 | -1.716939000 | -0.978023000 |

DF<sub>TS2</sub>

|   |              |              |             |
|---|--------------|--------------|-------------|
| 6 | -0.934411000 | 0.085291000  | 3.164049000 |
| 6 | -2.053825000 | -0.810964000 | 3.404522000 |
| 6 | -2.092395000 | -2.060568000 | 2.787549000 |
| 6 | -1.012985000 | -2.466987000 | 1.903707000 |
| 6 | 0.057695000  | -1.601372000 | 1.664628000 |
| 6 | 0.099559000  | -0.299579000 | 2.304562000 |
| 6 | -1.440320000 | 1.435606000  | 3.103020000 |
| 6 | -2.878695000 | 1.386744000  | 3.302580000 |
| 6 | -3.258702000 | -0.004032000 | 3.489446000 |
| 6 | -4.455485000 | -0.480065000 | 2.949829000 |

|   |              |              |              |                    |              |              |              |
|---|--------------|--------------|--------------|--------------------|--------------|--------------|--------------|
| 6 | -3.336383000 | -2.558039000 | 2.226662000  | 1                  | 4.668909000  | 1.492000000  | 2.034230000  |
| 6 | -1.580214000 | -3.212628000 | 0.805416000  | 1                  | 5.054412000  | 0.199019000  | 3.185680000  |
| 6 | -1.049855000 | -3.056792000 | -0.479767000 | 6                  | 7.344331000  | -0.621004000 | 2.148516000  |
| 6 | 0.077105000  | -2.175974000 | -0.710482000 | 1                  | 6.822702000  | -1.350265000 | 2.769123000  |
| 6 | 0.635766000  | -1.482050000 | 0.350415000  | 1                  | 7.896097000  | -1.141043000 | 1.365426000  |
| 6 | 1.212207000  | -0.111768000 | 0.210401000  | 1                  | 8.008148000  | -0.010705000 | 2.761505000  |
| 6 | 0.711556000  | 0.645022000  | 1.399168000  | 1                  | 4.898299000  | 0.024411000  | -0.989485000 |
| 6 | 0.200131000  | 1.930821000  | 1.317854000  | 6                  | 5.410266000  | -3.645732000 | 0.382586000  |
| 6 | -0.888032000 | 2.333934000  | 2.184260000  | 1                  | 5.064431000  | -4.650138000 | 0.175434000  |
| 6 | -3.711791000 | 2.245452000  | 2.584175000  | 6                  | 5.364557000  | -2.674687000 | -0.597869000 |
| 6 | -3.138805000 | 3.189501000  | 1.637516000  | 8                  | 5.882144000  | -1.511232000 | -0.552945000 |
| 6 | -1.758617000 | 3.227407000  | 1.440313000  | 16                 | 4.287261000  | -3.081988000 | -2.046323000 |
| 6 | -1.214106000 | 3.373240000  | 0.101673000  | 6                  | 5.180961000  | -0.193826000 | -3.373528000 |
| 6 | -0.004095000 | 2.582519000  | 0.012351000  | 1                  | 4.456015000  | -1.898707000 | -4.135766000 |
| 6 | 0.310059000  | 1.926359000  | -1.167625000 | 1                  | 5.653388000  | -1.303872000 | -2.951929000 |
| 6 | 0.990147000  | 0.594950000  | -1.205810000 | 1                  | 5.944022000  | -2.831511000 | -3.828149000 |
| 6 | 0.233539000  | -0.199910000 | -2.217976000 | 1                  | 5.719011000  | -0.456733000 | 0.977643000  |
| 6 | -0.128505000 | -1.522460000 | -2.018198000 | 1                  | 6.110353000  | -3.519858000 | 1.204680000  |
| 6 | -3.018764000 | -3.270552000 | 0.999332000  | 6                  | 3.733563000  | -2.801911000 | 1.755720000  |
| 6 | -3.660259000 | -1.228849000 | -3.092019000 | 8                  | 4.131659000  | -1.694868000 | 1.980383000  |
| 6 | -4.201798000 | -2.139329000 | -2.183630000 | 8                  | 3.001289000  | -3.722947000 | 1.863223000  |
| 6 | -5.283283000 | -1.733968000 | -1.305092000 | 6                  | 6.357223000  | 2.574086000  | -1.586906000 |
| 6 | -5.781016000 | -0.430578000 | -1.364265000 | 1                  | 5.551756000  | 3.101424000  | -2.108437000 |
| 6 | -5.217769000 | 0.519389000  | -2.307546000 | 1                  | 6.748407000  | 1.818627000  | -2.282754000 |
| 6 | -3.060748000 | 1.023520000  | -3.391085000 | 6                  | 7.955853000  | 2.104048000  | 0.866975000  |
| 6 | -1.855257000 | 0.215601000  | -3.470635000 | 1                  | 7.521424000  | 2.834699000  | 1.562171000  |
| 6 | -2.222087000 | -1.168936000 | -3.288838000 | 1                  | 8.755970000  | 1.580863000  | 1.402126000  |
| 6 | -1.376964000 | -2.016194000 | -2.563770000 | 6                  | 8.553884000  | 2.844593000  | -0.345098000 |
| 6 | -1.944707000 | -2.962971000 | -1.619912000 | 1                  | 9.088791000  | 2.120770000  | -0.975788000 |
| 6 | -3.326284000 | -3.028548000 | -1.436620000 | 1                  | 9.300740000  | 3.566221000  | 0.005057000  |
| 6 | -5.081370000 | -2.377634000 | -0.015902000 | 6                  | 7.471484000  | 3.547543000  | -1.175996000 |
| 6 | -5.385484000 | -1.691502000 | 1.161719000  | 1                  | 7.035851000  | 4.367662000  | -0.587836000 |
| 6 | -5.898075000 | -0.332869000 | 1.098830000  | 1                  | 7.918644000  | 4.005708000  | -2.065766000 |
| 6 | -6.091762000 | 0.284318000  | -0.137553000 |                    |              |              |              |
| 6 | -5.717058000 | 1.676530000  | -0.322509000 |                    |              |              |              |
| 6 | -5.177933000 | 1.822467000  | -1.663178000 |                    |              |              |              |
| 6 | -4.101697000 | 2.682351000  | -1.892040000 |                    |              |              |              |
| 6 | -3.021379000 | 2.272098000  | -2.772033000 |                    |              |              |              |
| 6 | -0.660782000 | 0.686598000  | -2.918095000 |                    |              |              |              |
| 6 | -0.617304000 | 1.986248000  | -2.273416000 |                    |              |              |              |
| 6 | -1.775854000 | 2.766731000  | -2.207690000 |                    |              |              |              |
| 6 | -2.081421000 | 3.479021000  | -0.990441000 |                    |              |              |              |
| 6 | -3.519566000 | 3.429360000  | -0.788927000 |                    |              |              |              |
| 6 | -4.038328000 | 3.286378000  | 0.498632000  |                    |              |              |              |
| 6 | -5.158643000 | 2.395441000  | 0.736366000  |                    |              |              |              |
| 6 | -4.956837000 | 1.751973000  | 2.025872000  |                    |              |              |              |
| 6 | -5.321420000 | 0.415720000  | 2.203533000  |                    |              |              |              |
| 6 | -3.875271000 | -3.180392000 | -0.098682000 |                    |              |              |              |
| 6 | -4.495065000 | -1.783197000 | 2.305515000  |                    |              |              |              |
| 6 | -4.179719000 | 0.128026000  | -3.155342000 |                    |              |              |              |
| 6 | 2.369252000  | 0.218695000  | -0.706204000 |                    |              |              |              |
| 6 | 3.370081000  | 1.276822000  | -0.333672000 |                    |              |              |              |
| 7 | 4.653462000  | 0.980091000  | -0.704772000 |                    |              |              |              |
| 8 | 3.067692000  | 2.314799000  | 0.253985000  |                    |              |              |              |
| 6 | 5.751986000  | 1.867858000  | -0.356792000 |                    |              |              |              |
| 1 | 5.324168000  | 2.639338000  | 0.291358000  |                    |              |              |              |
| 6 | 6.879399000  | 1.121470000  | 0.391966000  |                    |              |              |              |
| 1 | 7.322202000  | 0.389187000  | -0.290137000 |                    |              |              |              |
| 7 | 6.307269000  | 0.237153000  | 1.498426000  |                    |              |              |              |
| 1 | 2.786078000  | -0.656604000 | -1.203135000 |                    |              |              |              |
| 6 | 5.478829000  | 0.949832000  | 2.521255000  |                    |              |              |              |
| 1 | 6.116784000  | 1.638417000  | 3.078555000  |                    |              |              |              |
|   |              |              |              | DF <sub>2TS3</sub> |              |              |              |
|   |              |              |              | 6                  | 1.208466000  | -2.071800000 | 2.565681000  |
|   |              |              |              | 6                  | 2.290578000  | -1.407918000 | 3.274976000  |
|   |              |              |              | 6                  | 2.222077000  | -0.039636000 | 3.533630000  |
|   |              |              |              | 6                  | 1.067904000  | 0.723633000  | 3.089496000  |
|   |              |              |              | 6                  | 0.033476000  | 0.087051000  | 2.398049000  |
|   |              |              |              | 6                  | 0.101563000  | -1.337340000 | 2.128525000  |
|   |              |              |              | 6                  | 1.781884000  | -3.070985000 | 1.697086000  |
|   |              |              |              | 6                  | 3.225393000  | -3.033254000 | 1.859506000  |
|   |              |              |              | 6                  | 3.540562000  | -2.004085000 | 2.836818000  |
|   |              |              |              | 6                  | 4.672219000  | -1.203315000 | 2.669027000  |
|   |              |              |              | 6                  | 3.398018000  | 0.794818000  | 3.360568000  |
|   |              |              |              | 6                  | 1.521754000  | 2.021313000  | 2.647852000  |
|   |              |              |              | 6                  | 0.918883000  | 2.622286000  | 1.537077000  |
|   |              |              |              | 6                  | -0.171307000 | 1.964633000  | 0.844222000  |
|   |              |              |              | 6                  | -0.621675000 | 0.729812000  | 1.286551000  |
|   |              |              |              | 6                  | -1.132288000 | -0.326047000 | 0.364134000  |
|   |              |              |              | 6                  | -0.516218000 | -1.599204000 | 0.849119000  |
|   |              |              |              | 6                  | 0.059018000  | -2.533878000 | 0.002077000  |
|   |              |              |              | 6                  | 1.221444000  | -3.282573000 | 0.433221000  |
|   |              |              |              | 6                  | 4.056111000  | -3.220189000 | 0.754124000  |
|   |              |              |              | 6                  | 3.476074000  | -3.455041000 | -0.558855000 |
|   |              |              |              | 6                  | 2.090298000  | -3.479983000 | -0.713770000 |
|   |              |              |              | 6                  | 1.469983000  | -2.841776000 | -1.861425000 |
|   |              |              |              | 6                  | 0.214844000  | -2.257883000 | -1.436695000 |
|   |              |              |              | 6                  | -0.209897000 | -1.056235000 | -1.980980000 |
|   |              |              |              | 6                  | -0.964938000 | -0.026553000 | -1.202355000 |
|   |              |              |              | 6                  | -0.314640000 | 1.272639000  | -1.543699000 |

|    |              |              |              |
|----|--------------|--------------|--------------|
| 6  | -0.015679000 | 2.241275000  | -0.598285000 |
| 6  | 2.964287000  | 2.070199000  | 2.812450000  |
| 6  | 3.451932000  | 2.936785000  | -1.696727000 |
| 6  | 4.000458000  | 3.165746000  | -0.434166000 |
| 6  | 5.156551000  | 2.406599000  | 0.004943000  |
| 6  | 5.719474000  | 1.442659000  | -0.833971000 |
| 6  | 5.149896000  | 1.201916000  | -2.148224000 |
| 6  | 2.958878000  | 1.269674000  | -3.277670000 |
| 6  | 1.708514000  | 1.861987000  | -2.833098000 |
| 6  | 2.009662000  | 2.888759000  | -1.863631000 |
| 6  | 1.167176000  | 3.063140000  | -0.760153000 |
| 6  | 1.742053000  | 3.301894000  | 0.552131000  |
| 6  | 3.127062000  | 3.356528000  | 0.712672000  |
| 6  | 5.002828000  | 2.133452000  | 1.425732000  |
| 6  | 5.418059000  | 0.907427000  | 1.949484000  |
| 6  | 5.999461000  | -0.096933000 | 1.074403000  |
| 6  | 6.146691000  | 0.165029000  | -0.288175000 |
| 6  | 5.837747000  | -0.865958000 | -1.265125000 |
| 6  | 5.222539000  | -0.225947000 | -2.414521000 |
| 6  | 4.182354000  | -0.863715000 | -3.093566000 |
| 6  | 3.027037000  | -0.099613000 | -3.530819000 |
| 6  | 0.579981000  | 1.057664000  | -2.652486000 |
| 6  | 0.647940000  | -0.367586000 | -2.916973000 |
| 6  | 1.849227000  | -0.933954000 | -3.354638000 |
| 6  | 2.270376000  | -2.203902000 | -2.814623000 |
| 6  | 3.713429000  | -2.166230000 | -2.649453000 |
| 6  | 4.305154000  | -2.778746000 | -1.544167000 |
| 6  | 5.387922000  | -2.117645000 | -0.839870000 |
| 6  | 5.234016000  | -2.390683000 | 0.581107000  |
| 6  | 5.536592000  | -1.401202000 | 1.518786000  |
| 6  | 3.751593000  | 2.723693000  | 1.863574000  |
| 6  | 4.599419000  | 0.224403000  | 2.935742000  |
| 6  | 4.039828000  | 1.935051000  | -2.572017000 |
| 6  | -2.322245000 | -0.135439000 | -0.549739000 |
| 6  | -3.254211000 | -1.284660000 | -0.852990000 |
| 7  | -4.567452000 | -0.933697000 | -0.851069000 |
| 8  | -2.844308000 | -2.422370000 | -1.076585000 |
| 6  | -5.633581000 | -1.890895000 | -1.114808000 |
| 1  | -5.131383000 | -2.848121000 | -1.279958000 |
| 6  | -6.621173000 | -2.022576000 | 0.073433000  |
| 1  | -7.134428000 | -1.052407000 | 0.171365000  |
| 7  | -5.934857000 | -2.222340000 | 1.363235000  |
| 1  | -2.810853000 | 0.827578000  | -0.419338000 |
| 6  | -5.135173000 | -3.443100000 | 1.472965000  |
| 1  | -5.736132000 | -4.370257000 | 1.458068000  |
| 1  | -4.391419000 | -3.491658000 | 0.674287000  |
| 1  | -4.594261000 | -3.419375000 | 2.425651000  |
| 6  | -6.829100000 | -2.077138000 | 2.506653000  |
| 1  | -6.233842000 | -2.031699000 | 3.426237000  |
| 1  | -7.394632000 | -1.142228000 | 2.421831000  |
| 1  | -7.551988000 | -2.904879000 | 2.625427000  |
| 1  | -4.824637000 | 0.014496000  | -0.590105000 |
| 8  | -4.093902000 | 5.014909000  | -2.028044000 |
| 6  | -5.745221000 | 2.554807000  | 0.997885000  |
| 8  | -5.095788000 | 1.952777000  | 0.031821000  |
| 16 | -5.754618000 | 1.988722000  | 2.624522000  |
| 6  | -4.406122000 | 0.744833000  | 2.653942000  |
| 1  | -4.243080000 | 0.512297000  | 3.709464000  |
| 1  | -4.701595000 | -0.158985000 | 2.113093000  |
| 1  | -3.495676000 | 1.177398000  | 2.234236000  |
| 6  | -4.704417000 | 5.852897000  | -1.485657000 |
| 8  | -5.306768000 | 6.704522000  | -0.958964000 |

|        |              |              |              |
|--------|--------------|--------------|--------------|
| 6      | -6.341490000 | 3.741107000  | 0.484311000  |
| 1      | -6.530675000 | 4.593576000  | 1.133315000  |
| 1      | -5.340895000 | 3.074680000  | -0.473249000 |
| 1      | -7.161376000 | 3.534810000  | -0.209496000 |
| 6      | -7.698982000 | -3.077278000 | -0.280085000 |
| 1      | -7.221469000 | -4.058522000 | -0.408084000 |
| 1      | -8.406004000 | -3.178563000 | 0.551599000  |
| 6      | -6.390654000 | -1.514598000 | -2.405458000 |
| 1      | -6.832789000 | -0.514215000 | -2.282705000 |
| 1      | -5.667333000 | -1.440556000 | -3.225549000 |
| 6      | -7.492329000 | -2.528138000 | -2.743321000 |
| 1      | -7.030016000 | -3.495225000 | -2.988049000 |
| 1      | -8.035607000 | -2.206330000 | -3.640407000 |
| 6      | -8.456738000 | -2.711263000 | -1.565135000 |
| 1      | -9.015754000 | -1.777601000 | -1.403192000 |
| 1      | -9.201637000 | -3.483116000 | -1.795500000 |
| AF1Tsi |              |              |              |
| 6      | -1.792762000 | -2.382368000 | -2.562469000 |
| 6      | -3.006732000 | -1.728847000 | -3.024514000 |
| 6      | -2.963628000 | -0.408947000 | -3.471361000 |
| 6      | -1.703153000 | 0.314362000  | -3.471982000 |
| 6      | -0.538742000 | -0.310661000 | -3.017374000 |
| 6      | -0.580928000 | -1.684844000 | -2.552888000 |
| 6      | -2.131267000 | -3.228351000 | -1.443588000 |
| 6      | -3.558507000 | -3.103839000 | -1.201207000 |
| 6      | -4.100917000 | -2.175947000 | -2.180282000 |
| 6      | -5.107052000 | -1.820288000 | -1.812307000 |
| 6      | -4.009572000 | 0.523968000  | -3.090634000 |
| 6      | -1.963767000 | 1.684662000  | -3.099017000 |
| 6      | -1.047148000 | 2.365107000  | -2.290041000 |
| 6      | 0.170200000  | 1.714924000  | -1.847250000 |
| 6      | 0.429027000  | 0.407690000  | -2.227909000 |
| 6      | 1.142770000  | -0.568130000 | -1.352896000 |
| 6      | 0.365503000  | -1.840229000 | -1.472845000 |
| 6      | 0.022265000  | -2.625026000 | -0.383116000 |
| 6      | -1.241794000 | -3.331905000 | -0.369345000 |
| 6      | -4.045671000 | -3.098717000 | 0.106343000  |
| 6      | -3.124018000 | -3.219674000 | 1.224865000  |
| 6      | -1.753739000 | -3.328834000 | 0.989825000  |
| 6      | -0.808549000 | -2.607275000 | 1.823816000  |
| 6      | 0.293229000  | -2.170415000 | 0.991813000  |
| 6      | 0.900355000  | -0.947274000 | 1.231486000  |
| 6      | 1.437893000  | -0.074567000 | 0.142333000  |
| 6      | 0.965220000  | 1.301119000  | 0.477059000  |
| 6      | 0.442021000  | 2.169683000  | -0.468847000 |
| 6      | -3.390264000 | 1.819458000  | -2.859954000 |
| 6      | -2.538596000 | 3.242552000  | 1.449533000  |
| 6      | -3.415347000 | 3.360837000  | 0.370426000  |
| 6      | -4.676253000 | 2.642609000  | 0.375682000  |
| 6      | -5.011715000 | 1.827568000  | 1.458742000  |
| 6      | -4.099992000 | 1.701387000  | 2.582277000  |
| 6      | -1.677052000 | 1.740285000  | 3.037805000  |
| 6      | -0.584260000 | 2.183354000  | 2.188209000  |
| 6      | -1.111505000 | 3.108239000  | 1.212904000  |
| 6      | -0.613545000 | 3.089671000  | -0.094674000 |
| 6      | -1.529475000 | 3.214099000  | -1.214911000 |
| 6      | -2.899446000 | 3.351560000  | -0.989310000 |
| 6      | -4.944552000 | 2.194264000  | -0.982195000 |
| 6      | -5.537423000 | 0.949249000  | -1.201515000 |
| 6      | -5.881540000 | 0.099829000  | -0.073398000 |
| 6      | -5.624351000 | 0.529775000  | 1.228863000  |



|    |             |              |              |   |             |              |              |
|----|-------------|--------------|--------------|---|-------------|--------------|--------------|
| 1  | 1.600561000 | -0.515536000 | 0.215609000  | 6 | 2.900428000 | -2.703562000 | 1.691916000  |
| 6  | 5.678722000 | 5.141689000  | 0.527633000  | 6 | 5.750553000 | -2.583788000 | 1.632238000  |
| 1  | 4.939631000 | 5.872313000  | 0.189755000  | 6 | 5.026463000 | -3.254351000 | 0.563774000  |
| 1  | 5.436499000 | 4.807030000  | 1.536911000  | 6 | 3.633198000 | -3.307468000 | 0.592965000  |
| 1  | 6.678599000 | 5.578845000  | 0.521133000  | 6 | 2.867146000 | -3.102141000 | -0.623757000 |
| 6  | 6.051438000 | 4.363530000  | -1.788102000 | 6 | 1.656764000 | -2.382479000 | -0.285209000 |
| 1  | 7.013675000 | 4.872055000  | -1.757937000 | 6 | 1.141721000 | -1.441538000 | -1.163076000 |
| 1  | 6.141539000 | 3.451002000  | -2.377547000 | 6 | 0.461696000 | -0.188854000 | -0.709497000 |
| 1  | 5.271038000 | 5.013728000  | -2.192304000 | 6 | 1.030529000 | 0.895032000  | -1.563567000 |
| 1  | 3.581549000 | 0.535267000  | 0.346310000  | 6 | 1.415282000 | 2.127484000  | -1.059823000 |
| 6  | 7.165113000 | -1.078510000 | -1.595133000 | 6 | 4.776568000 | 3.111728000  | 1.814928000  |
| 6  | 7.035985000 | -2.465565000 | -1.225645000 | 6 | 4.711342000 | 2.328804000  | -2.735290000 |
| 8  | 6.250740000 | -2.897742000 | -0.365219000 | 6 | 5.397843000 | 2.976430000  | -1.707503000 |
| 16 | 8.183143000 | -3.585981000 | -2.048723000 | 6 | 6.615981000 | 2.399518000  | -1.170086000 |
| 6  | 7.765836000 | -5.131413000 | -1.170108000 | 6 | 7.100262000 | 1.192066000  | -1.677376000 |
| 1  | 8.438599000 | -5.900853000 | -1.555780000 | 6 | 6.386484000 | 0.515107000  | -2.745911000 |
| 1  | 7.912267000 | -5.003783000 | -0.096394000 | 6 | 4.077504000 | 0.221602000  | -3.559607000 |
| 1  | 6.728842000 | -5.409450000 | -1.364537000 | 6 | 2.873586000 | 0.955285000  | -3.206891000 |
| 6  | 6.058787000 | -0.153756000 | -1.331289000 | 6 | 3.261060000 | 2.251547000  | -2.702468000 |
| 8  | 5.151621000 | -0.542994000 | -0.393351000 | 6 | 2.549804000 | 2.818789000  | -1.639266000 |
| 8  | 5.944670000 | 0.936828000  | -1.878939000 | 6 | 3.268183000 | 3.492565000  | -0.571785000 |
| 1  | 5.382529000 | -1.477905000 | -0.121139000 | 6 | 4.660640000 | 3.574722000  | -0.605954000 |
| 1  | 7.707335000 | -0.853130000 | -2.506313000 | 6 | 6.636504000 | 2.646229000  | 0.263623000  |
| 6  | 8.775707000 | -0.317676000 | -0.274875000 | 6 | 7.140376000 | 1.675325000  | 1.131499000  |
| 1  | 9.472859000 | -0.950611000 | -0.818618000 | 6 | 7.639681000 | 0.416986000  | 0.602517000  |
| 6  | 8.993807000 | 1.019809000  | -0.673657000 | 6 | 7.620071000 | 0.180425000  | -0.772472000 |
| 6  | 8.482715000 | -0.919744000 | 1.049508000  | 6 | 7.224244000 | -1.122408000 | -1.281181000 |
| 6  | 7.573775000 | -0.431403000 | 2.005331000  | 6 | 6.462809000 | -0.916259000 | -2.500614000 |
| 6  | 9.200277000 | -2.093799000 | 1.361420000  | 6 | 5.366368000 | -1.733059000 | -2.784411000 |
| 6  | 7.406527000 | -1.087034000 | 3.223737000  | 6 | 4.149359000 | -1.150314000 | -3.322154000 |
| 1  | 7.016442000 | 0.466009000  | 1.786359000  | 6 | 1.793615000 | 0.286806000  | -2.623567000 |
| 6  | 9.036226000 | -2.742040000 | 2.582731000  | 6 | 1.865499000 | -1.141620000 | -2.376565000 |
| 1  | 9.903679000 | -2.494147000 | 0.636141000  | 6 | 3.021149000 | -1.847432000 | -2.725671000 |
| 6  | 8.134663000 | -2.239820000 | 3.521947000  | 6 | 3.534010000 | -2.853932000 | -1.827758000 |
| 1  | 6.699601000 | -0.690366000 | 3.947905000  | 6 | 4.985203000 | -2.787538000 | -1.859063000 |
| 1  | 9.613378000 | -3.636899000 | 2.799786000  | 6 | 5.717056000 | -2.982474000 | -0.687105000 |
| 1  | 7.999533000 | -2.742619000 | 4.475851000  | 6 | 6.858481000 | -2.136158000 | -0.393274000 |
| 1  | 6.427106000 | 3.306931000  | -0.032243000 | 6 | 6.879134000 | -1.889569000 | 1.040707000  |
| 7  | 8.372581000 | 2.163428000  | -0.275897000 | 6 | 7.264559000 | -0.639099000 | 1.528185000  |
| 8  | 7.429887000 | 2.150842000  | 0.600595000  | 6 | 5.431162000 | 3.375609000  | 0.611132000  |
| 8  | 8.708477000 | 3.259844000  | -0.793205000 | 6 | 6.460166000 | 1.397791000  | 2.384342000  |
| 1  | 9.658270000 | 1.210178000  | -1.505105000 | 6 | 5.217006000 | 1.072820000  | -3.266053000 |

<sup>A</sup>F<sub>ITS3</sub>

|   |             |              |             |   |              |              |              |
|---|-------------|--------------|-------------|---|--------------|--------------|--------------|
| 6 | 3.107012000 | -0.819606000 | 3.248547000 | 6 | -0.810887000 | -0.042809000 | 0.095723000  |
| 6 | 4.247930000 | 0.031386000  | 3.546071000 | 6 | -1.735223000 | -1.214173000 | 0.308499000  |
| 6 | 4.176071000 | 1.404083000  | 3.313294000 | 7 | -3.057586000 | -0.884484000 | 0.264630000  |
| 6 | 2.959281000 | 1.983469000  | 2.769378000 | 8 | -1.336616000 | -2.356019000 | 0.514835000  |
| 6 | 1.866874000 | 1.163583000  | 2.473221000 | 6 | -4.097625000 | -1.885650000 | 0.397933000  |
| 6 | 1.938909000 | -0.265455000 | 2.715806000 | 1 | -3.710322000 | -2.685522000 | 1.031953000  |
| 6 | 3.599433000 | -2.070612000 | 2.724620000 | 1 | -4.949136000 | -1.415612000 | 0.893246000  |
| 6 | 5.050514000 | -2.004527000 | 2.691237000 | 6 | -4.511067000 | -2.415070000 | -0.984726000 |
| 6 | 5.452287000 | -0.703309000 | 3.200200000 | 1 | -3.788907000 | -3.158974000 | -1.339994000 |
| 6 | 6.536450000 | -0.033629000 | 2.629348000 | 1 | -4.534992000 | -1.578546000 | -1.684075000 |
| 6 | 5.302845000 | 2.102701000  | 2.720440000 | 7 | -5.877753000 | -3.023891000 | -1.027940000 |
| 6 | 3.326331000 | 3.034861000  | 1.850329000 | 1 | -1.308632000 | 0.912710000  | -0.058468000 |
| 6 | 2.583013000 | 3.217476000  | 0.678971000 | 6 | -6.074703000 | -4.126228000 | -0.044892000 |
| 6 | 1.436022000 | 2.377847000  | 0.395760000 | 1 | -5.334617000 | -4.913676000 | -0.219711000 |
| 6 | 1.071534000 | 1.386227000  | 1.292726000 | 1 | -5.960955000 | -3.703472000 | 0.967013000  |
| 6 | 0.484090000 | 0.081834000  | 0.866555000 | 1 | -7.088312000 | -4.507867000 | -0.171242000 |
| 6 | 1.183124000 | -0.950188000 | 1.693287000 | 6 | -6.175357000 | -3.496617000 | -2.412011000 |
| 6 | 1.677644000 | -2.132878000 | 1.166740000 | 1 | -7.225746000 | -3.785087000 | -2.445616000 |
|   |             |              |             | 1 | -5.994895000 | -2.672940000 | -3.106231000 |
|   |             |              |             | 1 | -5.517129000 | -4.334477000 | -2.660926000 |

|        |               |              |              |    |              |              |              |
|--------|---------------|--------------|--------------|----|--------------|--------------|--------------|
| 1      | -3.374122000  | 0.031686000  | -0.037285000 | 6  | -0.073256000 | -1.295485000 | -0.624262000 |
| 6      | -7.589687000  | 1.202550000  | -0.946639000 | 6  | 3.819619000  | -2.427439000 | -2.646493000 |
| 6      | -8.300138000  | 2.546238000  | -0.856722000 | 6  | 2.212440000  | -3.155643000 | 1.620540000  |
| 8      | -8.145904000  | 3.323988000  | 0.075472000  | 6  | 3.075933000  | -3.640642000 | 0.637417000  |
| 16     | -9.399117000  | 2.861858000  | -2.223541000 | 6  | 4.501496000  | -3.387053000 | 0.731721000  |
| 6      | -10.144228000 | 4.450096000  | -1.709616000 | 6  | 5.011182000  | -2.651900000 | 1.803982000  |
| 1      | -11.173901000 | 4.289192000  | -1.384988000 | 6  | 4.114455000  | -2.143817000 | 2.827174000  |
| 1      | -9.548704000  | 4.850883000  | -0.886553000 | 6  | 1.795296000  | -1.336852000 | 3.049174000  |
| 1      | -10.121566000 | 5.131748000  | -2.561605000 | 6  | 0.684120000  | -1.452469000 | 2.118981000  |
| 6      | -6.141676000  | 1.270769000  | -0.448114000 | 6  | 0.937664000  | -2.570979000 | 1.241379000  |
| 8      | -5.871428000  | 2.068691000  | 0.580524000  | 6  | 0.576424000  | -2.483683000 | -0.108034000 |
| 8      | -5.263568000  | 0.596487000  | -0.959336000 | 6  | 1.477429000  | -2.991182000 | -1.127741000 |
| 1      | -6.674821000  | 2.599831000  | 0.802701000  | 6  | 2.698046000  | -3.561641000 | -0.764780000 |
| 1      | -7.534658000  | 0.907479000  | -1.997715000 | 6  | 5.008073000  | -3.158438000 | -0.612982000 |
| 6      | -8.447973000  | 0.077730000  | -0.200434000 | 6  | 6.003418000  | -2.203445000 | -0.830293000 |
| 1      | -9.490688000  | 0.308091000  | -0.466483000 | 6  | 6.529207000  | -1.435204000 | 0.286003000  |
| 6      | -8.085946000  | -1.279252000 | -0.810702000 | 6  | 6.043904000  | -1.654892000 | 1.575602000  |
| 6      | -8.366091000  | 0.192201000  | 1.320412000  | 6  | 5.782455000  | -0.528497000 | 2.456195000  |
| 6      | -7.466283000  | -0.562024000 | 2.081283000  | 6  | 4.590982000  | -0.830240000 | 3.229980000  |
| 6      | -9.214425000  | 1.079833000  | 1.997130000  | 6  | 3.677903000  | 0.183460000  | 3.527972000  |
| 6      | -7.392673000  | -0.420022000 | 3.466471000  | 6  | 2.252046000  | -0.076076000 | 3.431449000  |
| 1      | -6.844164000  | -1.295401000 | 1.581272000  | 6  | 0.081359000  | -0.299834000 | 1.603895000  |
| 6      | -9.145452000  | 1.229259000  | 3.382498000  | 6  | 0.555065000  | 1.013785000  | 2.002032000  |
| 1      | -9.950038000  | 1.651325000  | 1.437622000  | 6  | 1.616907000  | 1.121911000  | 2.905105000  |
| 6      | -8.228176000  | 0.483727000  | 4.123772000  | 6  | 2.638957000  | 2.114933000  | 2.678611000  |
| 1      | -6.688392000  | -1.023048000 | 4.033856000  | 6  | 3.917099000  | 1.539518000  | 3.061260000  |
| 1      | -9.817626000  | 1.921527000  | 3.882559000  | 6  | 5.061370000  | 1.826567000  | 2.316251000  |
| 1      | -8.175315000  | 0.594782000  | 5.203377000  | 6  | 6.012409000  | 0.774349000  | 2.009484000  |
| 1      | -6.673254000  | -2.213538000 | -0.795079000 | 6  | 6.519166000  | 1.003473000  | 0.664805000  |
| 7      | -9.041391000  | -2.291062000 | -0.510469000 | 6  | 6.775081000  | -0.079860000 | -0.178346000 |
| 8      | -9.844305000  | -2.131567000 | 0.422685000  | 6  | 3.895178000  | -3.270832000 | -1.537276000 |
| 8      | -9.000254000  | -3.363924000 | -1.172784000 | 6  | 5.926911000  | -1.324471000 | -1.983954000 |
| 1      | -8.006991000  | -1.229439000 | -1.899305000 | 6  | 2.743247000  | -2.392465000 | 2.739043000  |
|        |               |              |              | 6  | -1.158107000 | 1.759800000  | -1.314175000 |
|        |               |              |              | 6  | -1.662985000 | 3.182530000  | -1.233807000 |
| AF1TS4 |               |              |              | 7  | -3.008830000 | 3.291340000  | -1.408824000 |
| 6      | 3.727908000   | 2.076306000  | -2.697179000 | 8  | -0.916936000 | 4.136478000  | -1.032826000 |
| 6      | 4.678514000   | 1.021224000  | -3.009299000 | 6  | -3.685344000 | 4.576577000  | -1.322980000 |
| 6      | 4.223377000   | -0.237942000 | -3.397857000 | 1  | -2.909664000 | 5.342860000  | -1.385407000 |
| 6      | 2.795883000   | -0.495906000 | -3.487063000 | 1  | -4.338902000 | 4.692650000  | -2.195148000 |
| 6      | 1.882588000   | 0.514906000  | -3.175276000 | 6  | -4.467308000 | 4.766772000  | -0.019371000 |
| 6      | 2.353831000   | 1.826749000  | -2.772218000 | 1  | -4.808416000 | 5.821331000  | 0.034508000  |
| 6      | 4.248033000   | 2.842139000  | -1.590893000 | 1  | -3.771550000 | 4.613697000  | 0.813317000  |
| 6      | 5.524976000   | 2.265925000  | -1.205652000 | 7  | -5.587307000 | 3.836503000  | 0.147494000  |
| 6      | 5.792329000   | 1.138764000  | -2.084299000 | 1  | -1.876963000 | 1.044101000  | -1.704363000 |
| 6      | 6.403901000   | -0.011144000 | -1.580715000 | 6  | -6.700325000 | 4.152493000  | -0.747747000 |
| 6      | 4.857959000   | -1.435150000 | -2.875285000 | 1  | -7.105777000 | 5.169481000  | -0.576882000 |
| 6      | 2.546305000   | -1.842020000 | -3.028494000 | 1  | -6.384310000 | 4.086636000  | -1.793185000 |
| 6      | 1.394567000   | -2.112945000 | -2.281616000 | 1  | -7.506884000 | 3.429376000  | -0.600170000 |
| 6      | 0.440169000   | -1.062027000 | -1.989138000 | 6  | -6.045689000 | 3.837029000  | 1.535870000  |
| 6      | 0.670635000   | 0.224427000  | -2.451558000 | 1  | -6.876978000 | 3.135040000  | 1.650054000  |
| 6      | 0.264122000   | 1.448520000  | -1.700046000 | 1  | -5.230078000 | 3.520174000  | 2.194987000  |
| 6      | 1.436957000   | 2.371124000  | -1.798535000 | 1  | -6.392126000 | 4.833829000  | 1.873240000  |
| 6      | 1.943991000   | 3.074631000  | -0.717718000 | 1  | -3.575748000 | 2.451875000  | -1.454545000 |
| 6      | 3.367128000   | 3.316003000  | -0.613268000 | 6  | -5.687828000 | -0.456143000 | 0.256877000  |
| 6      | 5.881535000   | 2.197316000  | 0.141684000  | 6  | -5.033427000 | -0.952621000 | 1.392746000  |
| 6      | 4.973527000   | 2.703241000  | 1.159085000  | 8  | -4.573079000 | -2.192439000 | 1.476403000  |
| 6      | 3.743290000   | 3.245287000  | 0.787686000  | 16 | -4.678834000 | 0.094526000  | 2.741537000  |
| 6      | 2.548768000   | 2.947106000  | 1.558114000  | 6  | -3.348723000 | -0.813004000 | 3.614103000  |
| 6      | 1.429748000   | 2.843406000  | 0.643292000  | 1  | -3.700939000 | -1.789364000 | 3.947429000  |
| 6      | 0.428208000   | 1.913452000  | 0.878642000  | 1  | -2.471025000 | -0.921673000 | 2.974485000  |
| 6      | -0.290670000  | 1.190244000  | -0.213469000 | 1  | -3.098163000 | -0.194695000 | 4.479285000  |
| 6      | -0.337830000  | -0.233286000 | 0.225969000  |    |              |              |              |



|   |              |              |              |
|---|--------------|--------------|--------------|
| 6 | -4.186659000 | -0.666088000 | -1.098999000 |
| 8 | -3.749150000 | -1.790101000 | -0.997012000 |
| 8 | -4.150142000 | 0.369174000  | -1.708430000 |
| 1 | -4.406601000 | -2.503740000 | 0.547965000  |
| 1 | -5.822918000 | 0.624399000  | 0.278832000  |
| 6 | -6.849124000 | -1.163767000 | -0.482184000 |
| 6 | -6.761441000 | -2.665533000 | -0.738805000 |
| 6 | -8.193815000 | -0.872127000 | 0.233198000  |
| 6 | -6.953366000 | -3.614558000 | 0.277128000  |
| 6 | -6.546608000 | -3.123493000 | -2.046122000 |
| 1 | -8.215744000 | -1.229389000 | 1.261370000  |
| 7 | -8.451734000 | 0.608279000  | 0.301679000  |
| 6 | -6.918568000 | -4.980722000 | -0.006820000 |
| 1 | -7.121481000 | -3.295787000 | 1.301849000  |
| 6 | -6.510306000 | -4.487760000 | -2.332058000 |
| 1 | -6.401417000 | -2.403382000 | -2.847550000 |
| 8 | -8.629121000 | 1.186810000  | -0.767572000 |
| 8 | -8.441512000 | 1.139207000  | 1.409184000  |
| 6 | -6.696470000 | -5.421628000 | -1.311932000 |
| 1 | -7.067056000 | -5.699053000 | 0.794661000  |
| 1 | -6.337194000 | -4.819014000 | -3.352040000 |
| 1 | -6.669938000 | -6.485091000 | -1.532162000 |
| 1 | -6.924027000 | -0.668493000 | -1.456121000 |
| 1 | -9.021573000 | -1.292462000 | -0.341648000 |

AF<sub>1TSS</sub>

|   |              |              |              |
|---|--------------|--------------|--------------|
| 6 | -2.646340000 | 0.816176000  | -3.387403000 |
| 6 | -3.565490000 | 1.891526000  | -3.050910000 |
| 6 | -3.150385000 | 2.933578000  | -2.222963000 |
| 6 | -1.797359000 | 2.941168000  | -1.692588000 |
| 6 | -0.918049000 | 1.901278000  | -2.006760000 |
| 6 | -1.347030000 | 0.816578000  | -2.870134000 |
| 6 | -3.390352000 | -0.419157000 | -3.429546000 |
| 6 | -4.777412000 | -0.119871000 | -3.117042000 |
| 6 | -4.886405000 | 1.310969000  | -2.883382000 |
| 6 | -5.738225000 | 1.794254000  | -1.888011000 |
| 6 | -4.034862000 | 3.437879000  | -1.187322000 |
| 6 | -1.839901000 | 3.449786000  | -0.341873000 |
| 6 | -1.000193000 | 2.895002000  | 0.630250000  |
| 6 | -0.072352000 | 1.835819000  | 0.286092000  |
| 6 | -0.017301000 | 1.366554000  | -1.017252000 |
| 6 | 0.269648000  | -0.057441000 | -1.359875000 |
| 6 | -0.712464000 | -0.404979000 | -2.433035000 |
| 6 | -1.442654000 | -1.582802000 | -2.440213000 |
| 6 | -2.798350000 | -1.591345000 | -2.948286000 |
| 6 | -5.526085000 | -1.009498000 | -2.345674000 |
| 6 | -4.916936000 | -2.236162000 | -1.856177000 |
| 6 | -3.582210000 | -2.515760000 | -2.148089000 |
| 6 | -2.711922000 | -3.076940000 | -1.129845000 |
| 6 | -1.388104000 | -2.514137000 | -1.299879000 |
| 6 | -0.606505000 | -2.236194000 | -0.189100000 |
| 6 | 0.325395000  | -1.069563000 | -0.116576000 |
| 6 | 0.089534000  | -0.464947000 | 1.226631000  |
| 6 | -0.018665000 | 0.902529000  | 1.429821000  |
| 6 | -3.223535000 | 3.756962000  | -0.023269000 |
| 6 | -3.054351000 | 0.838022000  | 3.550552000  |
| 6 | -3.629729000 | 2.018626000  | 3.079000000  |
| 6 | -4.983191000 | 2.009754000  | 2.555800000  |
| 6 | -5.709996000 | 0.818012000  | 2.518346000  |
| 6 | -5.112660000 | -0.412519000 | 3.006786000  |
| 6 | -2.894702000 | -1.476372000 | 3.175610000  |
| 6 | -1.575018000 | -0.893059000 | 3.001720000  |

|    |              |               |              |
|----|--------------|---------------|--------------|
| 6  | -1.670648000 | 0.528928000   | 3.233833000  |
| 6  | -0.913993000 | 1.408468000   | 2.451228000  |
| 6  | -1.516627000 | 2.636360000   | 1.962877000  |
| 6  | -2.843074000 | 2.938689000   | 2.272935000  |
| 6  | -5.036468000 | 2.929584000   | 1.429741000  |
| 6  | -5.814484000 | 2.620188000   | 0.312283000  |
| 6  | -6.566621000 | 1.377059000   | 0.272585000  |
| 6  | -6.515631000 | 0.494931000   | 1.352488000  |
| 6  | -6.413073000 | -0.936083000  | 1.118966000  |
| 6  | -5.547059000 | -1.497277000  | 2.141002000  |
| 6  | -4.663486000 | -2.528848000  | 1.816604000  |
| 6  | -3.309808000 | -2.514857000  | 2.343102000  |
| 6  | -0.728249000 | -1.996473000  | 1.996473000  |
| 6  | -1.157477000 | -2.449904000  | 1.129203000  |
| 6  | -2.423728000 | -3.016586000  | 1.304824000  |
| 6  | -3.220470000 | -3.339931000  | 0.146193000  |
| 6  | -4.607868000 | -3.039346000  | 0.456424000  |
| 6  | -5.439373000 | -2.497220000  | -0.524155000 |
| 6  | -6.360092000 | -1.427614000  | -0.186954000 |
| 6  | -6.413406000 | -0.5746638000 | -1.313126000 |
| 6  | -6.517651000 | 0.866425000   | -1.087472000 |
| 6  | -3.716070000 | 3.506348000   | 1.258079000  |
| 6  | -5.303723000 | 2.879125000   | -1.022464000 |
| 6  | -3.812101000 | -0.402773000  | 3.514589000  |
| 6  | 1.539407000  | -0.772634000  | -0.968733000 |
| 6  | 2.145897000  | -1.844552000  | -1.843759000 |
| 7  | 3.504191000  | -1.891990000  | -1.783669000 |
| 8  | 1.469631000  | -2.595760000  | -2.540783000 |
| 6  | 4.254109000  | -2.905520000  | -2.509907000 |
| 1  | 3.733904000  | -3.089579000  | -3.453798000 |
| 1  | 5.238824000  | -2.491730000  | -2.747890000 |
| 6  | 4.372095000  | -4.242448000  | -1.765710000 |
| 1  | 4.866530000  | -4.971047000  | -2.440048000 |
| 1  | 3.356343000  | -4.609817000  | -1.585864000 |
| 7  | 5.060045000  | -4.156844000  | -0.474585000 |
| 1  | 2.259946000  | -0.126522000  | -0.472252000 |
| 6  | 6.488453000  | -3.876139000  | -0.619067000 |
| 1  | 7.018847000  | -4.661193000  | -1.192165000 |
| 1  | 6.648585000  | -2.919260000  | -1.121991000 |
| 1  | 6.952676000  | -3.798185000  | 0.368089000  |
| 6  | 4.860255000  | -5.383098000  | 0.294489000  |
| 1  | 5.337752000  | -5.284569000  | 1.275400000  |
| 1  | 3.789802000  | -5.556251000  | 0.447415000  |
| 1  | 5.285292000  | -6.277115000  | -0.200984000 |
| 1  | 3.994798000  | -1.308405000  | -1.113487000 |
| 6  | 6.326146000  | 1.295677000   | 1.234706000  |
| 6  | 5.544638000  | 0.096545000   | 1.252505000  |
| 8  | 4.733703000  | 0.096343000   | 0.217692000  |
| 16 | 5.501849000  | -1.108726000  | 2.474881000  |
| 6  | 3.952593000  | -2.016642000  | 2.105999000  |
| 1  | 4.092256000  | -2.639403000  | 1.217237000  |
| 1  | 3.759099000  | -2.643871000  | 2.980004000  |
| 1  | 3.130042000  | -1.310553000  | 1.973257000  |
| 1  | 5.137065000  | 1.275827000   | 0.257293000  |
| 6  | 7.415785000  | 1.449523000   | 0.160800000  |
| 6  | 7.551622000  | 2.866571000   | -0.397632000 |
| 6  | 8.807240000  | 1.021735000   | 0.694338000  |
| 6  | 8.217068000  | 3.059066000   | -1.617637000 |
| 6  | 7.054280000  | 3.988058000   | 0.275297000  |
| 1  | 9.104245000  | 1.594850000   | 1.572430000  |
| 7  | 8.787119000  | -0.422769000  | 1.110864000  |
| 6  | 8.383807000  | 4.336516000   | -2.150364000 |

|   |             |              |              |
|---|-------------|--------------|--------------|
| 1 | 8.597920000 | 2.197660000  | -2.163665000 |
| 6 | 7.223425000 | 5.269594000  | -0.253667000 |
| 1 | 6.512919000 | 3.860703000  | 1.207349000  |
| 8 | 8.970107000 | -0.684236000 | 2.295380000  |
| 8 | 8.553749000 | -1.247394000 | 0.227324000  |
| 6 | 7.889257000 | 5.448874000  | -1.465989000 |
| 1 | 8.893079000 | 4.462106000  | -3.102090000 |
| 1 | 6.827354000 | 6.127784000  | 0.282650000  |
| 1 | 8.016006000 | 6.445827000  | -1.878905000 |
| 1 | 7.186335000 | 0.776736000  | -0.673452000 |
| 1 | 9.569266000 | 1.095029000  | -0.084971000 |
| 1 | 6.600078000 | 1.712835000  | 2.205172000  |

AF2<sub>Ts1</sub>

|   |              |              |              |
|---|--------------|--------------|--------------|
| 6 | -1.812158000 | -2.724461000 | -2.138356000 |
| 6 | -3.075135000 | -2.299430000 | -2.720263000 |
| 6 | -3.166573000 | -1.069740000 | -3.370773000 |
| 6 | -1.997667000 | -0.211369000 | -3.464198000 |
| 6 | -0.786909000 | -0.615610000 | -2.895141000 |
| 6 | -0.689029000 | -1.895509000 | -2.218267000 |
| 6 | -2.092527000 | -3.419437000 | -0.905109000 |
| 6 | -3.532534000 | -3.428496000 | -0.711319000 |
| 6 | -4.141134000 | -2.735520000 | -1.835230000 |
| 6 | -5.255541000 | -1.918839000 | -1.632696000 |
| 6 | -4.325170000 | -0.219182000 | -3.162263000 |
| 6 | -2.426129000 | 1.159780000  | -3.319036000 |
| 6 | -1.622993000 | 2.061678000  | -2.612434000 |
| 6 | -0.356437000 | 1.637186000  | -2.050035000 |
| 6 | 0.063070000  | 0.326461000  | -2.212739000 |
| 6 | 0.850867000  | -0.408688000 | -1.180689000 |
| 6 | 0.229127000  | -1.766861000 | -1.110307000 |
| 6 | -0.061638000 | -2.407285000 | 0.084318000  |
| 6 | -1.236700000 | -3.248243000 | 0.187586000  |
| 6 | -4.064382000 | -3.277076000 | 0.569818000  |
| 6 | -3.176311000 | -3.112352000 | 1.709772000  |
| 6 | -1.794847000 | -3.093666000 | 1.519481000  |
| 6 | -0.969171000 | -2.143802000 | 2.244472000  |
| 6 | 0.104939000  | -1.714773000 | 1.373880000  |
| 6 | 0.560543000  | -0.406585000 | 1.426409000  |
| 6 | 1.036478000  | 0.342792000  | 0.222195000  |
| 6 | 0.396110000  | 1.687811000  | 0.324462000  |
| 6 | -0.188214000 | 2.330178000  | -0.756888000 |
| 6 | -3.866455000 | 1.160546000  | -3.129980000 |
| 6 | -3.339554000 | 3.329104000  | 0.912407000  |
| 6 | -4.184387000 | 3.173150000  | -0.187162000 |
| 6 | -5.354561000 | 2.320519000  | -0.090070000 |
| 6 | -5.634089000 | 1.650605000  | 1.102811000  |
| 6 | -4.755330000 | 1.810026000  | 2.248116000  |
| 6 | -2.370720000 | 2.205804000  | 2.734816000  |
| 6 | -1.305382000 | 2.636723000  | 1.845084000  |
| 6 | -1.898831000 | 3.329109000  | 0.725746000  |
| 6 | -1.354739000 | 3.165817000  | -0.553012000 |
| 6 | -2.237634000 | 3.005060000  | -1.695020000 |
| 6 | -3.621713000 | 3.012923000  | -1.518608000 |
| 6 | -5.520533000 | 1.637190000  | -1.363793000 |
| 6 | -5.959318000 | 0.311933000  | -1.392592000 |
| 6 | -6.245143000 | -0.385689000 | -0.149888000 |
| 6 | -6.086164000 | 0.269571000  | 1.071674000  |
| 6 | -5.483211000 | -0.425211000 | 2.197166000  |
| 6 | -4.661716000 | 0.526186000  | 2.924699000  |
| 6 | -3.448371000 | 0.116912000  | 3.481638000  |
| 6 | -2.279994000 | 0.974110000  | 3.381472000  |

|    |              |              |              |
|----|--------------|--------------|--------------|
| 6  | -0.196019000 | 1.813402000  | 1.632640000  |
| 6  | -0.099048000 | 0.531014000  | 2.305114000  |
| 6  | -1.120550000 | 0.122584000  | 3.168829000  |
| 6  | -1.565686000 | -1.249472000 | 3.139233000  |
| 6  | -3.005959000 | -1.259688000 | 3.331090000  |
| 6  | -3.795930000 | -2.171670000 | 2.630237000  |
| 6  | -5.058368000 | -1.747686000 | 2.054125000  |
| 6  | -5.224319000 | -2.431135000 | 0.780247000  |
| 6  | -5.808128000 | -1.764016000 | -0.298602000 |
| 6  | -4.453164000 | 2.068267000  | -2.247310000 |
| 6  | -5.349281000 | -0.635019000 | -2.309388000 |
| 6  | -3.631913000 | 2.633831000  | 2.155780000  |
| 6  | 2.207653000  | 0.040094000  | -0.684336000 |
| 6  | 3.257673000  | -0.971150000 | -0.290787000 |
| 7  | 4.501486000  | -0.665946000 | -0.742372000 |
| 8  | 3.002629000  | -1.962235000 | 0.395834000  |
| 6  | 5.673141000  | -1.528734000 | -0.586079000 |
| 1  | 6.457468000  | -1.026419000 | -1.159237000 |
| 6  | 6.193794000  | -1.682302000 | 0.874055000  |
| 1  | 5.456512000  | -2.218267000 | 1.439904000  |
| 7  | 6.299030000  | -0.331030000 | 1.577247000  |
| 1  | 2.592721000  | 0.917758000  | -1.198778000 |
| 6  | 7.523174000  | -0.112712000 | 2.394434000  |
| 1  | 7.598723000  | -0.846828000 | 3.202004000  |
| 1  | 8.404695000  | -0.139267000 | 1.755193000  |
| 1  | 7.447760000  | 0.885178000  | 2.833685000  |
| 6  | 5.105775000  | -0.058510000 | 2.422705000  |
| 1  | 5.044965000  | 1.017693000  | 2.608847000  |
| 1  | 4.201843000  | -0.398480000 | 1.923888000  |
| 1  | 5.196397000  | -0.588030000 | 3.378309000  |
| 1  | 4.642019000  | 0.222677000  | -1.227595000 |
| 6  | 6.754071000  | 1.847446000  | -0.020037000 |
| 6  | 5.534005000  | 2.508981000  | -0.465532000 |
| 8  | 4.770689000  | 2.135386000  | -1.355066000 |
| 16 | 5.138167000  | 3.988487000  | 0.520456000  |
| 6  | 3.498905000  | 4.404146000  | -0.166831000 |
| 1  | 3.523702000  | 4.275497000  | -1.250050000 |
| 1  | 2.715838000  | 3.771840000  | 0.257579000  |
| 1  | 3.303282000  | 5.449287000  | 0.082963000  |
| 6  | 7.704525000  | 1.240316000  | -0.955547000 |
| 8  | 7.248815000  | 1.066250000  | -2.230289000 |
| 8  | 8.815034000  | 0.829742000  | -0.635709000 |
| 1  | 7.993164000  | 0.645547000  | -2.700662000 |
| 1  | 7.296528000  | 2.392158000  | 0.753741000  |
| 1  | 6.384841000  | 0.634409000  | 0.752833000  |
| 6  | 5.457574000  | -2.918905000 | -1.222105000 |
| 1  | 4.666356000  | -3.442957000 | -0.676618000 |
| 1  | 5.097514000  | -2.769775000 | -2.246577000 |
| 6  | 7.517627000  | -2.467997000 | 0.840070000  |
| 1  | 8.265351000  | -1.900956000 | 0.269500000  |
| 1  | 7.911881000  | -2.597914000 | 1.852662000  |
| 6  | 7.320807000  | -3.852675000 | 0.200490000  |
| 1  | 6.638818000  | -4.446586000 | 0.825364000  |
| 1  | 8.280252000  | -4.383349000 | 0.191373000  |
| 6  | 6.749913000  | -3.743367000 | -1.217098000 |
| 1  | 7.494489000  | -3.269242000 | -1.873066000 |
| 1  | 6.559084000  | -4.741056000 | -1.630161000 |

AF2<sub>Ts2</sub>

|   |              |              |             |
|---|--------------|--------------|-------------|
| 6 | -3.283686000 | 1.528094000  | 3.040749000 |
| 6 | -4.363943000 | 0.625596000  | 3.405755000 |
| 6 | -4.130777000 | -0.746377000 | 3.489424000 |

|   |              |              |              |        |             |              |              |
|---|--------------|--------------|--------------|--------|-------------|--------------|--------------|
| 6 | -2.806226000 | -1.274209000 | 3.208732000  | 1      | 5.090463000 | 2.173162000  | 1.015234000  |
| 6 | -1.771185000 | -0.407488000 | 2.847051000  | 6      | 4.311304000 | 3.349698000  | -0.615323000 |
| 6 | -2.011065000 | 1.021127000  | 2.760000000  | 1      | 3.849094000 | 2.623184000  | -1.282512000 |
| 6 | -3.828510000 | 2.573355000  | 2.208272000  | 7      | 5.778100000 | 3.302617000  | -1.069301000 |
| 6 | -5.251394000 | 2.325757000  | 2.048666000  | 1      | 1.649475000 | -0.309919000 | 0.636338000  |
| 6 | -5.583194000 | 1.120189000  | 2.790395000  | 6      | 6.685952000 | 4.361149000  | -0.529883000 |
| 6 | -6.519454000 | 0.219583000  | 2.278125000  | 1      | 6.576295000 | 4.410889000  | 0.552723000  |
| 6 | -5.103462000 | -1.684826000 | 2.958019000  | 1      | 7.702795000 | 4.054152000  | -0.776820000 |
| 6 | -2.954295000 | -2.530539000 | 2.512680000  | 1      | 6.439264000 | 5.323384000  | -0.979699000 |
| 6 | -2.059843000 | -2.860829000 | 1.488507000  | 6      | 5.894950000 | 3.214024000  | -2.561489000 |
| 6 | -0.974444000 | -1.965762000 | 1.140550000  | 1      | 5.480267000 | 4.116809000  | -3.013224000 |
| 6 | -0.820233000 | -0.772575000 | 1.828249000  | 1      | 6.952187000 | 3.105239000  | -2.802328000 |
| 6 | -0.314085000 | 0.475062000  | 1.185135000  | 1      | 5.355623000 | 2.324987000  | -2.885771000 |
| 6 | -1.206237000 | 1.563950000  | 1.690097000  | 1      | 3.506566000 | 0.756514000  | 0.779270000  |
| 6 | -1.746280000 | 2.542561000  | 0.869996000  | 6      | 5.895251000 | -1.872222000 | -1.397679000 |
| 6 | -3.074117000 | 3.057283000  | 1.134716000  | 6      | 5.546403000 | -3.190698000 | -0.927312000 |
| 6 | -5.870539000 | 2.582042000  | 0.824670000  | 8      | 4.916677000 | -3.423986000 | 0.117654000  |
| 6 | -5.090896000 | 3.098329000  | -0.289305000 | 16     | 6.174483000 | -4.550559000 | -1.929946000 |
| 6 | -3.723345000 | 3.325135000  | -0.136544000 | 6      | 5.603942000 | -5.956125000 | -0.913133000 |
| 6 | -2.798738000 | 2.965504000  | -1.197262000 | 1      | 5.984684000 | -5.863143000 | -0.105027000 |
| 6 | -1.574333000 | 2.484733000  | -0.592190000 | 1      | 4.513515000 | -5.990072000 | -0.890185000 |
| 6 | -0.866349000 | 1.451464000  | -1.185641000 | 1      | 5.996381000 | -6.860571000 | -1.383508000 |
| 6 | -0.124502000 | 0.414220000  | -0.403918000 | 6      | 5.091096000 | -0.725350000 | -0.962372000 |
| 6 | -0.479456000 | -0.885007000 | -1.047855000 | 8      | 4.401672000 | -0.880348000 | 0.200422000  |
| 6 | -0.800865000 | -2.022935000 | -0.325002000 | 8      | 5.039689000 | 0.344002000  | -1.558506000 |
| 6 | -4.374995000 | -2.788892000 | 2.353485000  | 1      | 4.491989000 | -1.834501000 | 0.488849000  |
| 6 | -3.833033000 | -2.968841000 | -2.228835000 | 1      | 6.247474000 | -1.788375000 | -2.419606000 |
| 6 | -4.573124000 | -3.466807000 | -1.155712000 | 6      | 7.860160000 | -1.482845000 | -0.491341000 |
| 6 | -5.897993000 | -2.942810000 | -0.880433000 | 1      | 8.253006000 | -2.336206000 | -1.039302000 |
| 6 | -6.432651000 | -1.935621000 | -1.686345000 | 6      | 8.342388000 | -0.305172000 | -1.112981000 |
| 6 | -5.663726000 | -1.414490000 | -2.802875000 | 6      | 7.694843000 | -1.841323000 | 0.938957000  |
| 6 | -3.312448000 | -1.018322000 | -3.431343000 | 6      | 7.299990000 | -0.972498000 | 1.973266000  |
| 6 | -2.094405000 | -1.510564000 | -2.809840000 | 6      | 8.002267000 | -3.175704000 | 1.279928000  |
| 6 | -2.412003000 | -2.710540000 | -2.072419000 | 6      | 7.228621000 | -1.425940000 | 3.289234000  |
| 6 | -1.783716000 | -2.952165000 | -0.845743000 | 1      | 7.068384000 | 0.054357000  | 1.733028000  |
| 6 | -2.557549000 | -3.471344000 | 0.268313000  | 6      | 7.932584000 | -3.623934000 | 2.595757000  |
| 6 | -3.920652000 | -3.728096000 | 0.117314000  | 1      | 8.311119000 | -3.864744000 | 0.497884000  |
| 6 | -6.068683000 | -2.886037000 | 0.563350000  | 6      | 7.542860000 | -2.747762000 | 3.609478000  |
| 6 | -6.767010000 | -1.824396000 | 1.142220000  | 1      | 6.926163000 | -0.736006000 | 4.072864000  |
| 6 | -7.318580000 | -0.774058000 | 0.302573000  | 1      | 8.184584000 | -4.655024000 | 2.828472000  |
| 6 | -7.154833000 | -0.828507000 | -1.082046000 | 1      | 7.485267000 | -3.091513000 | 4.638844000  |
| 6 | -6.829259000 | 0.378036000  | -1.824452000 | 1      | 6.189319000 | 2.413249000  | -0.690965000 |
| 6 | -5.908710000 | 0.016424000  | -2.888057000 | 7      | 8.082017000 | 0.998636000  | -0.826008000 |
| 6 | -4.870854000 | 0.883215000  | -3.236469000 | 8      | 7.304302000 | 1.336573000  | 0.138070000  |
| 6 | -3.546381000 | 0.353752000  | -3.510827000 | 8      | 8.594126000 | 1.895659000  | -1.552328000 |
| 6 | -1.163918000 | -0.609073000 | -2.285320000 | 1      | 8.893345000 | -0.398400000 | -2.038825000 |
| 6 | -1.404970000 | 0.819645000  | -2.367536000 | 6      | 4.068584000 | 3.788545000  | 1.968800000  |
| 6 | -2.572711000 | 1.291617000  | -2.975341000 | 1      | 3.672044000 | 3.275411000  | 2.851384000  |
| 6 | -3.286768000 | 2.393193000  | -2.376440000 | 1      | 5.091664000 | 4.095316000  | 2.231029000  |
| 6 | -4.709898000 | 2.145665000  | -2.533612000 | 6      | 3.650703000 | 4.725776000  | -0.826490000 |
| 6 | -5.594528000 | 2.490306000  | -1.510913000 | 1      | 2.592578000 | 4.514980000  | -1.004384000 |
| 6 | -6.674952000 | 1.591315000  | -1.150594000 | 6      | 3.252023000 | 5.049334000  | 1.655506000  |
| 6 | -6.845708000 | 1.648069000  | 0.293411000  | 1      | 3.350442000 | 5.753862000  | 2.490864000  |
| 6 | -7.163738000 | 0.489270000  | 1.004665000  | 6      | 3.738665000 | 5.704487000  | 0.357741000  |
| 6 | -4.849294000 | -3.375220000 | 1.179347000  | 1      | 4.034246000 | 5.191896000  | -1.743241000 |
| 6 | -6.274487000 | -1.211357000 | 2.363312000  | 1      | 4.763414000 | 6.076084000  | 0.491710000  |
| 6 | -4.390696000 | -1.921805000 | -3.070168000 | 1      | 2.194922000 | 4.791600000  | 1.558735000  |
| 6 | 1.046996000  | 0.589927000  | 0.534652000  | 1      | 3.124599000 | 6.582528000  | 0.124312000  |
| 6 | 1.823926000  | 1.884141000  | 0.582254000  |        |             |              |              |
| 7 | 3.142049000  | 1.704131000  | 0.862220000  | AF2TS3 |             |              |              |
| 8 | 1.289630000  | 2.976746000  | 0.398146000  | 6      | 3.447135000 | -1.306652000 | 3.107813000  |
| 6 | 4.179079000  | 2.746321000  | 0.827169000  | 6      | 4.579030000 | -0.459021000 | 3.446577000  |

|   |              |              |              |        |              |              |              |
|---|--------------|--------------|--------------|--------|--------------|--------------|--------------|
| 6 | 4.436437000  | 0.927781000  | 3.455085000  | 6      | -4.112856000 | -2.078975000 | 0.611709000  |
| 6 | 3.154537000  | 1.525865000  | 3.121601000  | 1      | -4.952704000 | -1.395186000 | 0.736871000  |
| 6 | 2.070094000  | 0.710961000  | 2.784949000  | 6      | -4.260636000 | -2.714811000 | -0.809190000 |
| 6 | 2.215524000  | -0.732926000 | 2.776736000  | 1      | -3.745772000 | -2.029256000 | -1.484663000 |
| 6 | 3.934333000  | -2.427963000 | 2.341505000  | 7      | -5.695929000 | -2.670462000 | -1.337550000 |
| 6 | 5.372868000  | -2.283228000 | 2.196840000  | 1      | -1.308400000 | 0.725945000  | 0.522125000  |
| 6 | 5.772323000  | -1.064416000 | 2.881414000  | 6      | -6.607060000 | -3.724979000 | -0.808318000 |
| 6 | 6.774545000  | -0.255593000 | 2.341758000  | 1      | -6.248605000 | -4.717487000 | -1.088522000 |
| 6 | 5.477814000  | 1.770882000  | 2.894890000  | 1      | -6.664240000 | -3.649102000 | 0.278244000  |
| 6 | 3.397147000  | 2.731152000  | 2.364553000  | 1      | -7.594927000 | -3.561034000 | -1.238437000 |
| 6 | 2.542979000  | 3.065253000  | 1.307768000  | 6      | -5.678715000 | -2.726095000 | -2.830786000 |
| 6 | 1.405756000  | 2.226350000  | 0.985659000  | 1      | -6.703064000 | -2.601525000 | -3.182095000 |
| 6 | 1.161798000  | 1.083360000  | 1.730496000  | 1      | -5.060704000 | -1.905194000 | -3.201566000 |
| 6 | 0.582802000  | -0.161034000 | 1.143784000  | 1      | -5.267634000 | -3.677975000 | -3.177236000 |
| 6 | 1.393452000  | -1.277688000 | 1.721477000  | 1      | -3.229982000 | -0.211694000 | 0.385673000  |
| 6 | 1.881030000  | -2.330689000 | 0.963571000  | 6      | -6.571345000 | 1.893549000  | -0.824611000 |
| 6 | 3.166654000  | -2.916855000 | 1.279692000  | 6      | -7.009600000 | 3.288796000  | -0.398401000 |
| 6 | 5.992907000  | -2.643866000 | 0.999930000  | 8      | -6.800062000 | 3.747873000  | 0.717697000  |
| 6 | 5.198447000  | -3.165933000 | -0.100876000 | 16     | -7.881584000 | 4.199828000  | -1.648988000 |
| 6 | 3.816572000  | -3.294016000 | 0.036843000  | 6      | -8.279992000 | 5.711023000  | -0.702762000 |
| 6 | 2.934783000  | -2.931231000 | -1.058692000 | 1      | -7.363385000 | 6.175612000  | -0.336465000 |
| 6 | 1.735210000  | -2.339748000 | -0.502492000 | 1      | -8.792044000 | 6.381714000  | -1.395706000 |
| 6 | 1.107706000  | -1.294549000 | -1.162512000 | 1      | -8.933045000 | 5.470840000  | 0.137782000  |
| 6 | 0.426174000  | -0.170130000 | -0.449840000 | 6      | -5.232207000 | 1.486541000  | -0.214669000 |
| 6 | 0.876144000  | 1.066500000  | -1.153636000 | 8      | -4.956192000 | 1.890978000  | 1.022871000  |
| 6 | 1.260442000  | 2.217627000  | -0.484283000 | 8      | -4.454775000 | 0.770309000  | -0.823080000 |
| 6 | 4.834201000  | 2.886787000  | 2.219815000  | 1      | -5.643815000 | 2.541684000  | 1.313964000  |
| 6 | 4.378923000  | 2.860139000  | -2.375204000 | 1      | -6.427794000 | 1.886383000  | -1.908419000 |
| 6 | 5.133176000  | 3.364206000  | -1.314897000 | 6      | -7.711969000 | 0.821795000  | -0.519988000 |
| 6 | 6.415525000  | 2.769475000  | -0.987213000 | 1      | -8.616201000 | 1.278738000  | -0.946002000 |
| 6 | 6.894652000  | 1.688286000  | -1.729645000 | 6      | -7.422962000 | -0.456319000 | -1.329619000 |
| 6 | 6.110663000  | 1.160596000  | -2.832554000 | 6      | -7.996377000 | 0.653562000  | 0.970404000  |
| 6 | 3.748730000  | 0.887212000  | -3.485358000 | 6      | -7.428267000 | -0.367444000 | 1.739096000  |
| 6 | 2.556603000  | 1.490566000  | -2.913724000 | 6      | -8.871093000 | 1.544345000  | 1.609751000  |
| 6 | 2.941515000  | 2.704515000  | -2.233268000 | 6      | -7.696514000 | -0.482442000 | 3.103420000  |
| 6 | 2.311189000  | 3.051519000  | -1.033104000 | 1      | -6.796715000 | -1.102320000 | 1.254988000  |
| 6 | 3.099801000  | 3.576696000  | 0.067674000  | 6      | -9.144772000 | 1.436766000  | 2.972642000  |
| 6 | 4.479297000  | 3.734836000  | -0.069970000 | 1      | -9.362061000 | 2.321694000  | 1.029423000  |
| 6 | 6.559261000  | 2.778322000  | 0.460571000  | 6      | -8.551599000 | 0.424854000  | 3.728807000  |
| 6 | 7.175633000  | 1.704889000  | 1.106862000  | 1      | -7.243361000 | -1.288211000 | 3.675119000  |
| 6 | 7.669245000  | 0.577715000  | 0.333385000  | 1      | -9.830550000 | 2.137841000  | 3.440831000  |
| 6 | 7.531789000  | 0.569592000  | -1.055105000 | 1      | -8.765312000 | 0.335790000  | 4.790412000  |
| 6 | 7.138233000  | -0.650422000 | -1.740273000 | 1      | -6.325015000 | -1.619317000 | -1.119929000 |
| 6 | 6.260895000  | -0.285857000 | -2.838752000 | 7      | -8.649628000 | -1.173546000 | -1.569144000 |
| 6 | 5.173406000  | -1.099933000 | -3.162174000 | 8      | -9.616337000 | -1.003118000 | -0.812912000 |
| 6 | 3.891739000  | -0.499614000 | -3.489168000 | 8      | -8.687786000 | -1.997362000 | -2.515517000 |
| 6 | 1.559927000  | 0.681001000  | -2.361670000 | 1      | -7.022284000 | -0.210279000 | -2.316016000 |
| 6 | 1.706037000  | -0.762916000 | -2.365217000 | 6      | -4.171018000 | -3.075242000 | 1.792587000  |
| 6 | 2.849244000  | -1.341893000 | -2.924941000 | 1      | -3.825591000 | -2.551900000 | 2.690965000  |
| 6 | 3.478702000  | -2.454779000 | -2.255805000 | 1      | -5.231918000 | -3.307892000 | 1.965472000  |
| 6 | 4.917454000  | -2.310054000 | -2.398214000 | 6      | -3.583000000 | -4.101988000 | -0.923900000 |
| 6 | 5.760765000  | -2.657461000 | -1.342143000 | 1      | -2.510976000 | -3.898572000 | -1.007902000 |
| 6 | 6.893000000  | -1.813757000 | -1.007894000 | 1      | -3.878612000 | -4.593727000 | -1.858458000 |
| 6 | 7.036327000  | -1.805201000 | 0.440194000  | 6      | -3.407975000 | -4.393158000 | 1.600463000  |
| 6 | 7.419516000  | -0.633848000 | 1.096664000  | 1      | -2.334085000 | -4.200651000 | 1.622888000  |
| 6 | 5.365343000  | 3.378310000  | 1.026658000  | 6      | -3.778939000 | -5.057755000 | 0.269240000  |
| 6 | 6.624097000  | 1.190859000  | 2.348228000  | 1      | -4.810623000 | -5.426945000 | 0.316853000  |
| 6 | 4.878803000  | 1.735698000  | -3.150412000 | 1      | -3.148815000 | -5.940437000 | 0.105501000  |
| 6 | -0.770883000 | -0.218782000 | 0.474184000  | 1      | -3.645668000 | -5.067104000 | 2.433200000  |
| 6 | -1.637421000 | -1.455356000 | 0.564010000  |        |              |              |              |
| 7 | -2.962444000 | -1.157209000 | 0.650841000  |        |              |              |              |
| 8 | -1.154039000 | -2.584978000 | 0.569409000  |        |              |              |              |
|   |              |              |              | AF2TS4 |              |              |              |
|   |              |              |              | 6      | -3.422779000 | 2.289830000  | 2.597940000  |

|   |              |              |              |    |             |              |              |
|---|--------------|--------------|--------------|----|-------------|--------------|--------------|
| 6 | -4.376223000 | 1.272802000  | 3.011589000  | 8  | 1.201731000 | 4.135860000  | 0.548385000  |
| 6 | -3.925474000 | 0.034238000  | 3.465921000  | 6  | 4.065105000 | 4.513616000  | 0.785996000  |
| 6 | -2.499520000 | -0.240693000 | 3.520813000  | 1  | 5.086579000 | 4.273541000  | 1.110827000  |
| 6 | -1.583905000 | 0.733222000  | 3.113042000  | 6  | 4.089780000 | 4.779225000  | -0.742711000 |
| 6 | -2.050532000 | 2.023906000  | 2.641515000  | 1  | 3.046351000 | 4.938735000  | -1.035557000 |
| 6 | -3.972012000 | 2.990120000  | 1.462413000  | 7  | 4.538315000 | 3.573573000  | -1.473880000 |
| 6 | -5.270293000 | 2.411281000  | 1.161487000  | 1  | 2.120256000 | 1.094157000  | 1.480443000  |
| 6 | -5.521302000 | 1.348474000  | 2.121174000  | 6  | 5.985804000 | 3.378436000  | -1.525164000 |
| 6 | -6.166177000 | 0.178170000  | 1.715801000  | 1  | 6.513139000 | 4.102651000  | -2.171671000 |
| 6 | -4.595461000 | -1.184085000 | 3.046468000  | 1  | 6.418556000 | 3.449653000  | -0.520940000 |
| 6 | -2.285851000 | -1.618267000 | 3.144113000  | 1  | 6.194503000 | 2.375825000  | -1.911655000 |
| 6 | -1.166053000 | -1.957662000 | 2.377161000  | 6  | 3.954551000 | 3.469166000  | -2.809951000 |
| 6 | -0.209169000 | -0.942676000 | 1.982865000  | 1  | 4.219783000 | 2.497111000  | -3.242718000 |
| 6 | -0.404585000 | 0.375004000  | 2.366640000  | 1  | 2.863181000 | 3.524393000  | -2.740193000 |
| 6 | -0.010011000 | 1.539110000  | 1.518810000  | 1  | 4.295673000 | 4.258080000  | -3.506569000 |
| 6 | -1.162781000 | 2.489147000  | 1.601718000  | 1  | 3.791184000 | 2.447247000  | 1.100692000  |
| 6 | -1.698647000 | 3.127699000  | 0.494853000  | 6  | 4.108640000 | -1.549356000 | -0.389013000 |
| 6 | -3.121374000 | 3.385995000  | 0.425291000  | 6  | 4.758504000 | -0.679456000 | 0.516001000  |
| 6 | -5.675837000 | 2.260606000  | -0.165055000 | 8  | 4.713529000 | 0.630223000  | 0.311008000  |
| 6 | -4.798671000 | 2.684605000  | -1.245009000 | 16 | 5.684621000 | -1.195959000 | 1.899753000  |
| 6 | -3.548799000 | 3.230237000  | -0.953941000 | 6  | 6.354829000 | 0.396740000  | 2.506052000  |
| 6 | -2.387353000 | 2.862831000  | -1.744782000 | 1  | 6.929200000 | 0.895180000  | 1.724382000  |
| 6 | -1.237740000 | 2.799975000  | -0.865625000 | 1  | 5.559258000 | 1.050977000  | 2.866265000  |
| 6 | -0.257157000 | 1.842371000  | -1.075750000 | 1  | 7.012498000 | 0.128924000  | 3.336231000  |
| 6 | 0.486820000  | 1.178883000  | 0.038793000  | 6  | 4.865850000 | -1.026529000 | -2.135322000 |
| 6 | 0.499876000  | -0.271586000 | -0.309993000 | 8  | 4.829047000 | 0.197219000  | -2.185788000 |
| 6 | 0.249605000  | -1.272579000 | 0.618239000  | 8  | 5.112907000 | -2.001494000 | -2.789425000 |
| 6 | -3.580371000 | -2.206374000 | 2.847052000  | 1  | 4.574848000 | 0.776426000  | -0.685296000 |
| 6 | -2.139369000 | -3.236511000 | -1.418081000 | 1  | 3.161534000 | -1.105146000 | -0.708291000 |
| 6 | -2.972685000 | -3.641995000 | -0.375204000 | 6  | 3.935690000 | -3.048499000 | -0.101653000 |
| 6 | -4.396891000 | -3.371753000 | -0.435659000 | 1  | 3.231213000 | -3.104874000 | 0.737742000  |
| 6 | -4.934628000 | -2.699647000 | -1.535145000 | 6  | 3.196473000 | -3.720162000 | -1.276437000 |
| 6 | -4.068734000 | -2.274038000 | -2.620545000 | 6  | 5.173041000 | -3.850277000 | 0.299032000  |
| 6 | -1.748588000 | -1.520965000 | -2.976302000 | 6  | 6.340803000 | -3.875778000 | -0.479004000 |
| 6 | -0.607298000 | -1.592562000 | -2.079389000 | 6  | 5.121189000 | -4.637324000 | 1.458925000  |
| 6 | -0.844480000 | -2.648073000 | -1.122130000 | 6  | 7.432178000 | -4.652217000 | -0.089736000 |
| 6 | -0.431996000 | -2.483226000 | 0.205316000  | 1  | 6.393282000 | -3.293269000 | -1.392079000 |
| 6 | -1.301964000 | -2.908136000 | 1.287472000  | 6  | 6.212480000 | -5.416366000 | 1.845478000  |
| 6 | -2.543055000 | -3.478469000 | 1.004915000  | 1  | 4.215284000 | -4.644952000 | 2.059269000  |
| 6 | -4.851008000 | -3.047392000 | 0.907977000  | 6  | 7.374180000 | -5.422507000 | 1.073474000  |
| 6 | -5.824370000 | -2.064494000 | 1.097338000  | 1  | 8.329717000 | -4.658592000 | -0.702577000 |
| 6 | -6.379636000 | -1.362115000 | -0.047704000 | 1  | 6.150741000 | -6.019602000 | 2.747198000  |
| 6 | -5.944328000 | -1.673125000 | -1.336339000 | 1  | 8.225888000 | -6.028150000 | 1.371379000  |
| 6 | -5.699203000 | -0.610900000 | -2.297653000 | 1  | 3.841482000 | -3.966341000 | -2.114596000 |
| 6 | -4.540825000 | -0.981830000 | -3.091492000 | 7  | 2.553025000 | -5.019465000 | -0.842444000 |
| 6 | -3.625119000 | -0.004810000 | -3.487411000 | 8  | 1.974157000 | -5.038395000 | 0.242838000  |
| 6 | -2.200557000 | -0.280642000 | -3.424403000 | 8  | 2.617540000 | -5.958327000 | -1.625945000 |
| 6 | 0.030517000  | -0.419469000 | -1.664918000 | 1  | 2.358350000 | -3.107917000 | -1.625954000 |
| 6 | -0.436494000 | 0.872792000  | -2.131844000 | 6  | 3.594777000 | 5.741931000  | 1.589516000  |
| 6 | -1.529774000 | 0.938545000  | -3.000846000 | 1  | 2.535752000 | 5.913324000  | 1.376635000  |
| 6 | -2.529207000 | 1.960395000  | -2.803838000 | 1  | 3.674686000 | 5.513508000  | 2.659609000  |
| 6 | -3.828477000 | 1.382315000  | -3.102746000 | 6  | 4.873714000 | 6.072161000  | -1.060982000 |
| 6 | -4.940745000 | 1.735978000  | -2.338363000 | 1  | 5.935680000 | 5.931916000  | -0.816224000 |
| 6 | -5.894799000 | 0.721808000  | -1.929793000 | 1  | 4.826286000 | 6.270212000  | -2.139242000 |
| 6 | -6.348939000 | 1.046092000  | -0.585984000 | 6  | 4.401748000 | 6.998291000  | 1.237780000  |
| 6 | -6.589231000 | 0.024356000  | 0.335022000  | 1  | 5.450801000 | 6.870790000  | 1.545835000  |
| 6 | -3.707136000 | -3.117731000 | 1.797913000  | 1  | 4.013434000 | 7.854361000  | 1.803139000  |
| 6 | -5.693877000 | -1.113793000 | 2.187558000  | 6  | 4.348622000 | 7.278255000  | -0.269608000 |
| 6 | -2.698986000 | -2.538751000 | -2.564523000 | 1  | 4.936410000 | 8.171613000  | -0.515661000 |
| 6 | 1.405684000  | 1.802514000  | 1.067193000  | 1  | 3.311423000 | 7.492409000  | -0.564046000 |
| 6 | 1.933969000  | 3.207267000  | 0.875626000  |    |             |              |              |
| 7 | 3.273528000  | 3.316816000  | 1.118548000  |    |             |              |              |

AF<sub>2TSS</sub>

|   |              |              |              |    |               |              |              |
|---|--------------|--------------|--------------|----|---------------|--------------|--------------|
| 6 | 2.750860000  | 0.272043000  | -3.433243000 | 7  | -3.492003000  | 1.616699000  | -0.836356000 |
| 6 | 3.776972000  | -0.754791000 | -3.518703000 | 8  | -1.557814000  | 2.753774000  | -1.311396000 |
| 6 | 3.504838000  | -2.053495000 | -3.090877000 | 6  | -4.450098000  | 2.683654000  | -1.160294000 |
| 6 | 2.193785000  | -2.378833000 | -2.555009000 | 1  | -5.434509000  | 2.262110000  | -0.927907000 |
| 6 | 1.211794000  | -1.388728000 | -2.462130000 | 6  | -4.241167000  | 3.954607000  | -0.293413000 |
| 6 | 1.491963000  | -0.036608000 | -2.908282000 | 1  | -3.226829000  | 4.302296000  | -0.510246000 |
| 6 | 3.383941000  | 1.515692000  | -3.067215000 | 7  | -4.260154000  | 3.638486000  | 1.152169000  |
| 6 | 4.808310000  | 1.269304000  | -2.920208000 | 1  | -2.019535000  | -0.344760000 | -0.221918000 |
| 6 | 5.052179000  | -0.136222000 | -3.200524000 | 6  | -5.589207000  | 3.514071000  | 1.749431000  |
| 6 | 6.003332000  | -0.842139000 | -2.460936000 | 1  | -6.125584000  | 4.475279000  | 1.844234000  |
| 6 | 4.492695000  | -2.789551000 | -2.321833000 | 1  | -6.217037000  | 2.826507000  | 1.175968000  |
| 6 | 2.364668000  | -3.312018000 | -1.466503000 | 1  | -5.487796000  | 3.099176000  | 2.759226000  |
| 6 | 1.544623000  | -3.211028000 | -0.337182000 | 6  | -3.421s381000 | 4.543871000  | 1.931345000  |
| 6 | 0.510846000  | -2.197558000 | -0.264343000 | 1  | -3.371031000  | 4.190635000  | 2.968409000  |
| 6 | 0.333693000  | -1.318665000 | -1.321809000 | 1  | -2.405278000  | 4.549522000  | 1.524509000  |
| 6 | -0.094739000 | 0.099410000  | -1.141163000 | 1  | -3.791281000  | 5.586596000  | 1.957356000  |
| 6 | 0.785104000  | 0.890750000  | -2.055815000 | 1  | -3.862135000  | 0.759885000  | -0.438764000 |
| 6 | 1.411798000  | 2.067413000  | -1.676614000 | 6  | -6.152020000  | -2.194185000 | 1.157046000  |
| 6 | 2.726964000  | 2.386055000  | -2.191424000 | 6  | -5.233612000  | -1.138611000 | 1.453582000  |
| 6 | 5.526974000  | 1.912297000  | -1.911738000 | 8  | -4.337012000  | -1.058079000 | 0.495093000  |
| 6 | 4.848927000  | 2.829311000  | -1.008996000 | 16 | -5.150948000  | -0.204422000 | 2.893222000  |
| 6 | 3.479440000  | 3.055154000  | -1.144849000 | 6  | -3.487617000  | 0.562326000  | 2.808920000  |
| 6 | 2.631320000  | 3.143122000  | 0.030861000  | 1  | -3.511916000  | 1.432298000  | 2.145161000  |
| 6 | 1.351508000  | 2.541950000  | -0.283211000 | 1  | -3.244787000  | 0.871632000  | 3.828576000  |
| 6 | 0.667689000  | 1.823088000  | 0.685285000  | 1  | -2.759830000  | -0.175572000 | 2.465440000  |
| 6 | -0.157387000 | 0.614797000  | 0.377838000  | 1  | -4.876588000  | -2.165039000 | 0.290607000  |
| 6 | 0.215586000  | -0.386102000 | 1.419350000  | 6  | -7.144497000  | -2.031486000 | -0.011752000 |
| 6 | 0.451236000  | -1.722338000 | 1.132936000  | 6  | -7.569101000  | -3.379152000 | -0.583863000 |
| 6 | 3.786713000  | -3.568145000 | -1.316506000 | 6  | -8.414521000  | -1.238709000 | 0.377597000  |
| 6 | 3.599462000  | -2.080978000 | 3.050914000  | 6  | -7.338976000  | -3.671424000 | -1.933739000 |
| 6 | 4.241207000  | -2.964461000 | 2.182030000  | 6  | -8.205749000  | -4.343184000 | 0.210580000  |
| 6 | 5.553088000  | -2.640356000 | 1.653290000  | 1  | -8.933128000  | -1.651869000 | 1.242086000  |
| 6 | 6.172958000  | -1.440721000 | 2.009160000  | 7  | -8.073685000  | 0.185138000  | 0.738878000  |
| 6 | 5.506264000  | -0.518648000 | 2.911835000  | 6  | -7.728883000  | -4.896165000 | -2.478059000 |
| 6 | 3.221760000  | 0.193300000  | 3.506724000  | 1  | -6.846658000  | -2.934726000 | -2.564761000 |
| 6 | 1.947652000  | -0.425511000 | 3.181401000  | 6  | -8.598004000  | -5.567604000 | -0.330564000 |
| 6 | 2.177340000  | -1.823605000 | 2.903286000  | 1  | -8.393658000  | -4.144681000 | 1.263162000  |
| 6 | 1.449276000  | -2.453843000 | 1.887791000  | 8  | -8.475828000  | 0.622277000  | 1.809449000  |
| 6 | 2.121049000  | -3.373157000 | 0.986071000  | 8  | -7.403357000  | 0.817213000  | -0.079964000 |
| 6 | 3.485301000  | -3.627683000 | 1.131453000  | 6  | -8.360413000  | -5.848324000 | -1.677420000 |
| 6 | 5.612215000  | -3.109187000 | 0.277183000  | 1  | -7.537742000  | -5.104570000 | -3.527269000 |
| 6 | 6.288590000  | -2.358832000 | -0.686834000 | 1  | -9.087922000  | -6.303317000 | 0.301551000  |
| 6 | 6.929318000  | -1.107958000 | -0.316076000 | 1  | -8.664519000  | -6.802534000 | -2.098605000 |
| 6 | 6.872882000  | -0.658509000 | 1.003703000  | 1  | -6.667782000  | -1.457636000 | -0.812086000 |
| 6 | 6.635224000  | 0.747845000  | 1.283874000  | 1  | -9.100587000  | -1.164174000 | -0.471511000 |
| 6 | 5.791672000  | 0.834843000  | 2.462921000  | 1  | -6.564261000  | -2.739155000 | 2.007269000  |
| 6 | 4.805422000  | 1.820159000  | 2.543304000  | 6  | -5.227360000  | 5.065347000  | -0.721755000 |
| 6 | 3.493931000  | 1.490197000  | 3.073314000  | 1  | -6.257222000  | 4.752200000  | -0.502213000 |
| 6 | 1.001647000  | 0.276789000  | 2.429465000  | 1  | -5.040367000  | 5.966403000  | -0.123576000 |
| 6 | 1.282089000  | 1.627163000  | 1.978141000  | 6  | -4.404811000  | 3.010975000  | -2.669273000 |
| 6 | 2.504539000  | 2.224617000  | 2.300968000  | 1  | -3.382151000  | 3.308415000  | -2.925556000 |
| 6 | 3.196058000  | 3.003825000  | 1.302815000  | 1  | -4.623985000  | 2.094902000  | -3.231857000 |
| 6 | 4.620757000  | 2.757009000  | 1.446962000  | 6  | -5.379731000  | 4.129714000  | -3.056243000 |
| 6 | 5.431104000  | 2.670262000  | 0.314370000  | 1  | -5.282572000  | 4.350910000  | -4.126616000 |
| 6 | 6.458086000  | 1.648523000  | 0.231580000  | 1  | -6.415426000  | 3.793330000  | -2.898376000 |
| 6 | 6.517288000  | 1.179863000  | -1.144749000 | 6  | -5.125050000  | 5.388445000  | -2.218583000 |
| 6 | 6.751128000  | -0.170494000 | -1.412625000 | 1  | -5.840996000  | 6.177602000  | -2.481659000 |
| 6 | 4.336847000  | -3.722826000 | -0.043399000 | 1  | -4.123908000  | 5.781994000  | -2.445532000 |
| 6 | 5.717698000  | -2.195592000 | -2.012245000 |    |               |              |              |
| 6 | 4.246143000  | -0.832927000 | 3.424302000  |    |               |              |              |
| 6 | -1.393175000 | 0.503850000  | -0.486540000 |    |               |              |              |
| 6 | -2.144054000 | 1.744271000  | -0.922579000 |    |               |              |              |
